# Supplementary material for: VCD spectroscopy reveals conformational changes of chiral crown ethers upon complexation of potassium and ammonium cations
Source: Royal Society of Chemistry journal article supplement (doi:10.1039/d2cp01309f), 2022-01-01
Supplement: d2cp01309f1.pdf [file d2cp01309f1.pdf]

Supporting information for

# VCD spectroscopy reveals conformational changes of chiral crown ethers upon complexation of potassium and ammonium cations

Luisa Weirich,<sup>a</sup> Gers Tusha,<sup>b</sup> Elric Engelage,<sup>a</sup> Lars V. Schäfer,<sup>b</sup> Christian Merten\*<sup>a</sup>

a) Ruhr Universität Bochum  
Fakultät für Chemie und Biochemie, Organische Chemie II  
Universitätsstraße 150  
44801 Bochum, Germany  
christian.merten@ruhr-uni-bochum.de  
www.mertenlab.de

b) Ruhr Universität Bochum  
Fakultät für Chemie und Biochemie, Theoretische Chemie  
Universitätsstraße 150  
44801 Bochum, Germany

## Table of Contents

|      |                                                                                           |    |
|------|-------------------------------------------------------------------------------------------|----|
| 1.   | Additional figures .....                                                                  | 2  |
| 2.   | X-ray structures of 2,3-DiPh-18c6 and 2-Ph-18c6 .....                                     | 5  |
| 3.   | Conformational analysis of 2,3-DiPh-18c6 and its complexes.....                           | 11 |
| 3.1  | Cartesian coordinates of 2,3-DiPh-18c6.....                                               | 13 |
| 3.2. | Cartesian Coordinates of K <sup>+</sup> /2,3-DiPh-18c6.....                               | 17 |
| 3.3  | Cartesian coordinates of CH <sub>3</sub> NH <sub>3</sub> <sup>+</sup> / 2,3-DiPh18c6..... | 20 |
| 4.   | Conformational analysis of 2-Ph-18c6 and its K <sup>+</sup> complex.....                  | 26 |
| 4.1  | Cartesian Coordinates of 2-Ph-18c6.....                                                   | 27 |
| 4.2  | Cartesian Coordinates of K <sup>+</sup> /2-Ph-18c6.....                                   | 29 |

## 1. Additional figures

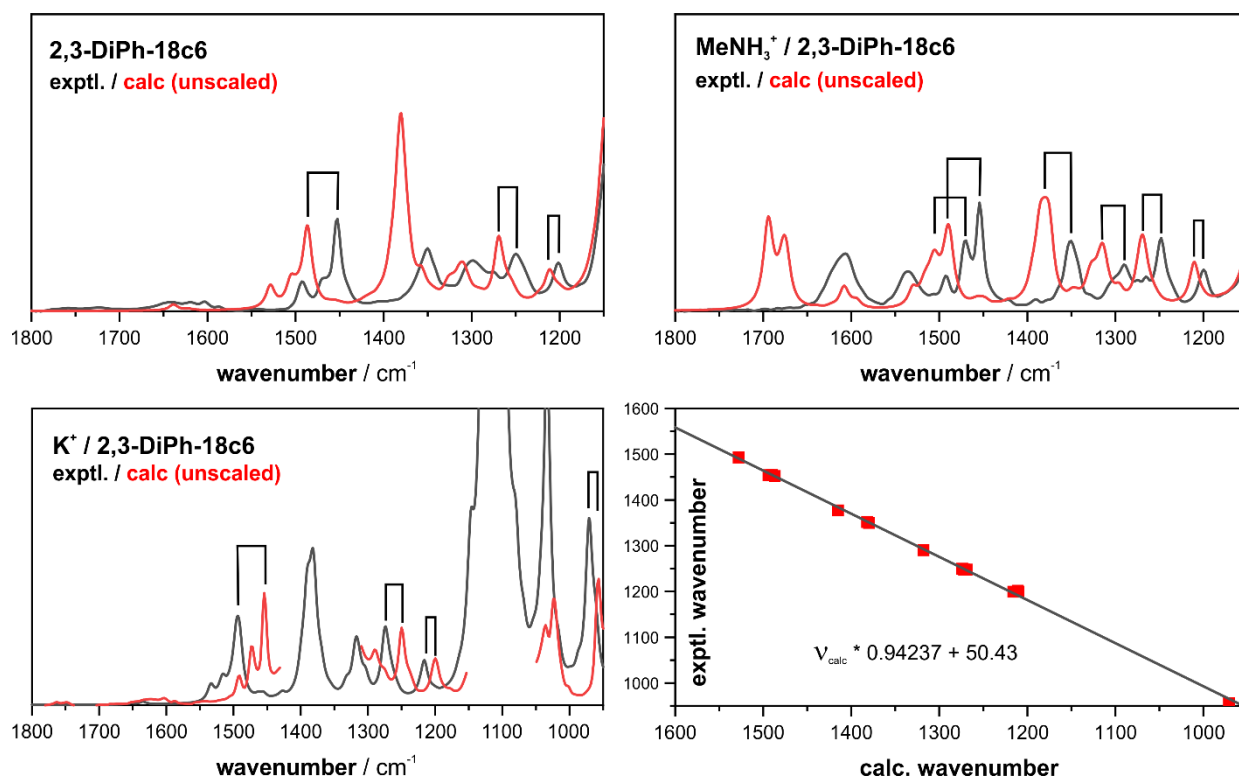

Fig. S1. Peak assignment for the determination of the frequency scaling factor.

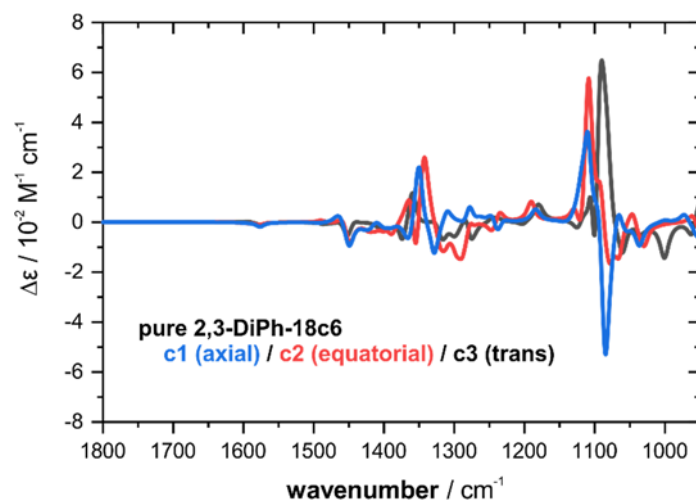

Fig. S2. Single conformer VCD spectra of the three lowest energy conformers of pure 2,3-DiPh-18c6.

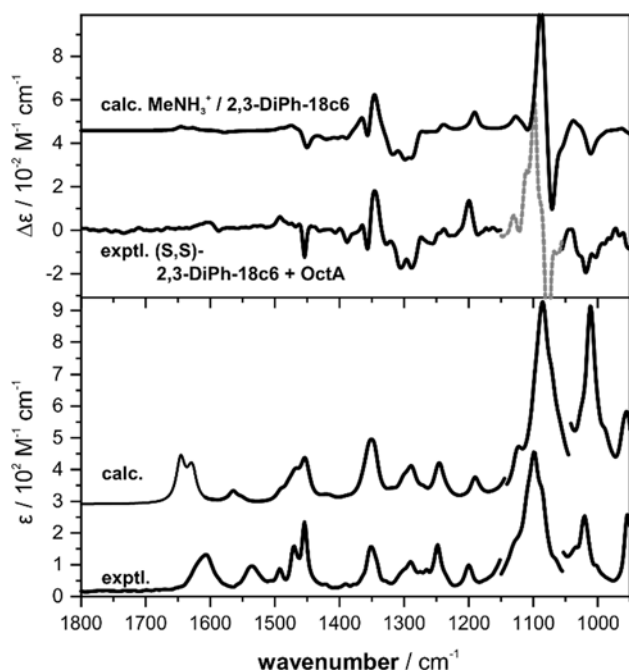

**Fig. S3.** Full range view of the comparison of the computed IR and VCD spectra of  $\text{MeNH}_3^+ / 2,3\text{-DiPh-18c6}$  with the experimental ones.

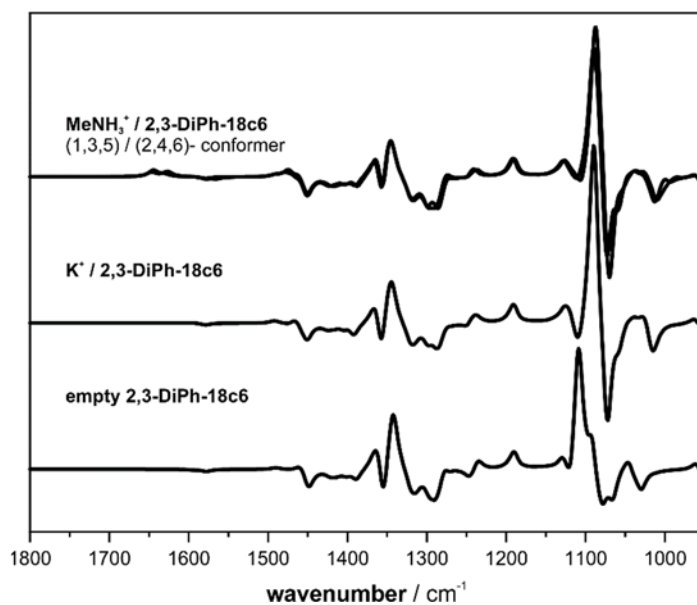

**Fig. S4.** Comparison of the computed VCD spectra of the two highly populated conformers of  $\text{MeNH}_3^+ / 2,3\text{-DiPh-18c6}$  with empty equatorial conformer and the equatorial conformer of  $\text{K}^+ / 2,3\text{-DiPh-18c6}$

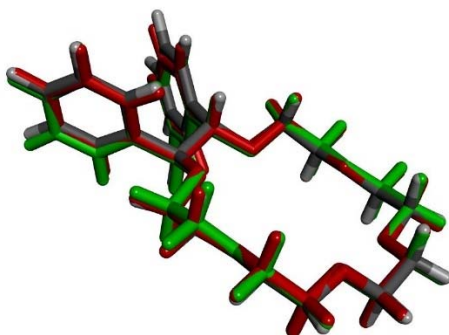

**Figure S5.** Overlap of the  $D_{3d}$ -symmetric crown ether structure of **2,3-DiPh-18c6**, its  $K^+$  and  $MeNH_3^+$  complexes.

## 2. X-ray structures of 2,3-DiPh-18c6 and 2-Ph-18c6

Note that the crystal structures were obtained for (R,R)-2,3-DiPh-18c6 and (R)-2-Ph-18c6. In order to avoid confusion as all calculations were carried out for the (S,S)- and (S)-isomers, the structures were mirrored for presentation in Figs. 4A and 7B of the main article.

**Table S1.** Crystal data and structure refinement for 2,3-DiPh-18c6.

|                                                      |                                                    |
|------------------------------------------------------|----------------------------------------------------|
| CCDC-Nr                                              | 2157857                                            |
| Empirical formula                                    | C <sub>24</sub> H <sub>32</sub> K N O <sub>9</sub> |
| Formula weight [g/mol]                               | 517.6                                              |
| Crystal system                                       | Orthorhombic                                       |
| Space group                                          | P2 <sub>1</sub> 2 <sub>1</sub> 2 <sub>1</sub> (19) |
| Lattice parameters [Å]                               |                                                    |
| a                                                    | 9.6493(4)                                          |
| b                                                    | 11.3747(5)                                         |
| c                                                    | 23.4471(9)                                         |
| a                                                    | 90                                                 |
| b                                                    | 90                                                 |
| g                                                    | 90                                                 |
| Density [g/cm <sup>3</sup> ]                         | 1.333                                              |
| Crystal size [mm <sup>3</sup> ]                      | 0.296 x 0.221 x 0.071                              |
| Volume [Å <sup>3</sup> ]                             | 2573.50(18)                                        |
| Z                                                    | 4                                                  |
| Temperature [K]                                      | 292.8(4)                                           |
| Diffraction Device                                   | SuperNova, Single source at offset/far, Atlas      |
| Radiation Type                                       | 1.54184 Å ( Cu K/ micro-focus sealed X-ray tube)   |
| F(000)                                               | 1092                                               |
| Absorption coefficient [mm <sup>-1</sup> ]           | 2.252                                              |
| Absorption correction                                | Gaussian                                           |
| Measurement range                                    | 3.8 - 66.5                                         |
| Index range                                          | -11 < h < 11<br>-13 < k < 9<br>-26 < l < 27        |
| Measured reflexes                                    | 8501                                               |
| Independent                                          | 4539                                               |
| Observed                                             | 3880                                               |
| R(int)                                               | 0.0258                                             |
| Completeness (%) / theta (°)                         | 100.0 / 66.494                                     |
| Transmission (min / max)                             | 0.456 / 1.000                                      |
| R1 (observed/all)                                    | 0.0397 / 0.0486                                    |
| wR2 (observed/all)                                   | 0.0982 / 0.1046                                    |
| GooF = S                                             | 1.01                                               |
| Rest electron density max./min. [e-/Å <sup>3</sup> ] | -0.198 / 0.225                                     |

**Table S2.** Atomic coordinates and equivalent isotropic displacement parameters [ $\text{\AA}^2$ ] for **2,3-DiPh-18c6**

|        | x          | y          | z           | U(eq)      | S.O.F. |
|--------|------------|------------|-------------|------------|--------|
| K(1)   | 0.62957(9) | 0.53281(7) | 0.52512(3)  | 0.0578(2)  | 1      |
| O(1)   | 0.5007(3)  | 0.5594(2)  | 0.63931(10) | 0.0510(6)  | 1      |
| O(2)   | 0.4207(3)  | 0.3808(3)  | 0.55594(13) | 0.0721(8)  | 1      |
| O(3)   | 0.4441(4)  | 0.4142(3)  | 0.44015(13) | 0.0761(9)  | 1      |
| O(4)   | 0.6485(3)  | 0.5689(3)  | 0.40424(12) | 0.0728(8)  | 1      |
| O(5)   | 0.7118(3)  | 0.7465(3)  | 0.48274(11) | 0.0642(7)  | 1      |
| O(6)   | 0.6950(3)  | 0.7148(2)  | 0.60111(10) | 0.0522(6)  | 1      |
| O(7)   | 0.9153(4)  | 0.4947(4)  | 0.52133(18) | 0.1002(11) | 1      |
| O(8)   | 0.8313(4)  | 0.4482(3)  | 0.60267(16) | 0.0846(9)  | 1      |
| O(9)   | 1.0418(4)  | 0.5052(6)  | 0.5962(2)   | 0.140(2)   | 1      |
| N(1)   | 0.9308(4)  | 0.4825(4)  | 0.5734(2)   | 0.0779(11) | 1      |
| C(1)   | 0.5436(4)  | 0.6082(3)  | 0.73880(15) | 0.0483(8)  | 1      |
| C(2)   | 0.4203(4)  | 0.6667(3)  | 0.75045(17) | 0.0567(9)  | 1      |
| C(3)   | 0.3681(5)  | 0.6731(4)  | 0.80499(19) | 0.0671(10) | 1      |
| C(4)   | 0.4388(5)  | 0.6198(4)  | 0.84900(19) | 0.0703(11) | 1      |
| C(5)   | 0.5594(5)  | 0.5620(4)  | 0.83836(19) | 0.0735(12) | 1      |
| C(6)   | 0.6121(4)  | 0.5557(4)  | 0.78384(17) | 0.0605(9)  | 1      |
| C(7)   | 0.6013(3)  | 0.6026(3)  | 0.67882(15) | 0.0461(7)  | 1      |
| C(8)   | 0.6506(4)  | 0.7240(3)  | 0.65928(14) | 0.0454(7)  | 1      |
| C(9)   | 0.7090(5)  | 0.8277(3)  | 0.57454(17) | 0.0608(10) | 1      |
| C(10)  | 0.7897(5)  | 0.8136(4)  | 0.52142(19) | 0.0713(11) | 1      |
| C(11)  | 0.7799(6)  | 0.7365(5)  | 0.4293(2)   | 0.0866(15) | 1      |
| C(12)  | 0.6820(7)  | 0.6857(5)  | 0.3882(2)   | 0.0878(16) | 1      |
| C(13)  | 0.5559(5)  | 0.5159(5)  | 0.36610(18) | 0.0783(14) | 1      |
| C(14)  | 0.5169(6)  | 0.3987(5)  | 0.3884(2)   | 0.0848(15) | 1      |
| C(15)  | 0.3989(7)  | 0.3062(4)  | 0.4628(2)   | 0.0883(15) | 1      |
| C(16)  | 0.3265(6)  | 0.3273(5)  | 0.5172(2)   | 0.0854(15) | 1      |
| C(17)  | 0.3648(5)  | 0.3922(4)  | 0.61122(18) | 0.0656(10) | 1      |
| C(18)  | 0.4751(5)  | 0.4369(3)  | 0.64942(17) | 0.0604(10) | 1      |
| C(19)  | 0.7652(4)  | 0.7667(3)  | 0.69740(14) | 0.0452(7)  | 1      |
| C(20)  | 0.7513(4)  | 0.8691(3)  | 0.72866(15) | 0.0533(8)  | 1      |
| C(21)  | 0.8548(5)  | 0.9045(4)  | 0.76634(17) | 0.0664(11) | 1      |
| C(22)  | 0.9722(5)  | 0.8386(4)  | 0.77274(18) | 0.0653(10) | 1      |
| C(23)  | 0.9889(4)  | 0.7377(4)  | 0.74060(17) | 0.0618(10) | 1      |
| C(24)  | 0.8872(4)  | 0.7018(3)  | 0.70313(16) | 0.0534(8)  | 1      |
| H(2)   | 0.372103   | 0.702297   | 0.720761    | 0.068      | 1      |
| H(3)   | 0.285832   | 0.713069   | 0.812069    | 0.08       | 1      |
| H(4)   | 0.404079   | 0.623337   | 0.885963    | 0.084      | 1      |
| H(5)   | 0.606818   | 0.526347   | 0.868235    | 0.088      | 1      |
| H(6)   | 0.694627   | 0.515661   | 0.777287    | 0.073      | 1      |
| H(7)   | 0.680887   | 0.54898    | 0.678705    | 0.055      | 1      |
| H(8)   | 0.572895   | 0.779295   | 0.661464    | 0.055      | 1      |
| H(9A)  | 0.756157   | 0.881514   | 0.600086    | 0.073      | 1      |
| H(9B)  | 0.618203   | 0.859715   | 0.565949    | 0.073      | 1      |
| H(10A) | 0.809867   | 0.890125   | 0.505119    | 0.086      | 1      |
| H(10B) | 0.876822   | 0.774537   | 0.529532    | 0.086      | 1      |
| H(11A) | 0.860776   | 0.686381   | 0.432899    | 0.104      | 1      |
| H(11B) | 0.810136   | 0.8134     | 0.416408    | 0.104      | 1      |
| H(12A) | 0.598342   | 0.732937   | 0.386935    | 0.105      | 1      |
| H(12B) | 0.723016   | 0.685836   | 0.35038     | 0.105      | 1      |
| H(13A) | 0.599035   | 0.507821   | 0.32894     | 0.094      | 1      |
| H(13B) | 0.473841   | 0.564473   | 0.361933    | 0.094      | 1      |
| H(14A) | 0.458873   | 0.358056   | 0.360967    | 0.102      | 1      |
| H(14B) | 0.599348   | 0.351835   | 0.394881    | 0.102      | 1      |
| H(15A) | 0.47775    | 0.254922   | 0.469084    | 0.106      | 1      |
| H(15B) | 0.336746   | 0.267952   | 0.436103    | 0.106      | 1      |
| H(16A) | 0.247396   | 0.3784     | 0.511043    | 0.102      | 1      |
| H(16B) | 0.293235   | 0.253495   | 0.532787    | 0.102      | 1      |
| H(17A) | 0.331828   | 0.316613   | 0.624684    | 0.079      | 1      |
| H(17B) | 0.287261   | 0.446535   | 0.610735    | 0.079      | 1      |
| H(18A) | 0.447538   | 0.425633   | 0.688824    | 0.072      | 1      |
| H(18B) | 0.559686   | 0.392719   | 0.643016    | 0.072      | 1      |
| H(20)  | 0.67205    | 0.914837   | 0.724477    | 0.064      | 1      |
| H(21)  | 0.844009   | 0.973342   | 0.787254    | 0.08       | 1      |
| H(22)  | 1.040302   | 0.861428   | 0.798532    | 0.078      | 1      |
| H(23)  | 1.069563   | 0.693639   | 0.744271    | 0.074      | 1      |
| H(24)  | 0.899953   | 0.634068   | 0.681571    | 0.064      | 1      |

**Table S3.** Anisotropic displacement parameters [ $\text{\AA}^2$ ] for **2,3-DiPh-18c6**

|       | $U^{11}$   | $U^{22}$   | $U^{33}$   | $U^{23}$    | $U^{13}$    | $U^{12}$    |
|-------|------------|------------|------------|-------------|-------------|-------------|
| K(1)  | 0.0617(4)  | 0.0559(4)  | 0.0558(4)  | 0.0003(3)   | -0.0015(4)  | -0.0055(4)  |
| O(1)  | 0.0547(13) | 0.0427(12) | 0.0555(13) | 0.0032(10)  | -0.0070(12) | -0.0076(10) |
| O(2)  | 0.0774(19) | 0.0751(19) | 0.0638(17) | -0.0122(14) | -0.0019(15) | -0.0293(15) |
| O(3)  | 0.102(2)   | 0.0636(17) | 0.0630(17) | -0.0145(13) | 0.0054(16)  | -0.0053(15) |
| O(4)  | 0.0732(18) | 0.089(2)   | 0.0557(15) | -0.0060(14) | -0.0070(15) | 0.0025(16)  |
| O(5)  | 0.0741(17) | 0.0700(16) | 0.0487(14) | 0.0093(13)  | 0.0086(13)  | -0.0069(13) |
| O(6)  | 0.0672(15) | 0.0431(12) | 0.0463(13) | 0.0034(10)  | -0.0004(12) | -0.0086(11) |
| O(7)  | 0.094(2)   | 0.115(3)   | 0.092(3)   | 0.010(2)    | 0.002(2)    | 0.017(2)    |
| O(8)  | 0.083(2)   | 0.079(2)   | 0.091(2)   | -0.0016(18) | 0.002(2)    | 0.0201(17)  |
| O(9)  | 0.079(2)   | 0.177(5)   | 0.164(5)   | 0.021(4)    | -0.045(3)   | 0.002(3)    |
| N(1)  | 0.073(2)   | 0.069(2)   | 0.092(3)   | 0.000(2)    | -0.017(2)   | 0.0193(19)  |
| C(1)  | 0.0469(18) | 0.0455(17) | 0.0526(19) | 0.0030(15)  | -0.0015(16) | -0.0059(14) |
| C(2)  | 0.0510(19) | 0.056(2)   | 0.063(2)   | 0.0042(17)  | -0.0053(18) | 0.0009(15)  |
| C(3)  | 0.058(2)   | 0.067(2)   | 0.076(3)   | -0.007(2)   | 0.013(2)    | -0.006(2)   |
| C(4)  | 0.079(3)   | 0.077(3)   | 0.055(2)   | -0.003(2)   | 0.006(2)    | -0.018(2)   |
| C(5)  | 0.078(3)   | 0.086(3)   | 0.056(2)   | 0.014(2)    | -0.006(2)   | -0.008(2)   |
| C(6)  | 0.054(2)   | 0.066(2)   | 0.062(2)   | 0.0142(17)  | -0.0035(19) | 0.0011(17)  |
| C(7)  | 0.0412(17) | 0.0460(17) | 0.0512(18) | 0.0050(14)  | -0.0026(14) | -0.0008(13) |
| C(8)  | 0.0465(17) | 0.0430(16) | 0.0468(17) | 0.0041(13)  | -0.0002(15) | -0.0012(13) |
| C(9)  | 0.079(3)   | 0.0449(19) | 0.059(2)   | 0.0090(16)  | 0.000(2)    | -0.0159(18) |
| C(10) | 0.078(3)   | 0.072(3)   | 0.064(2)   | 0.010(2)    | -0.002(2)   | -0.029(2)   |
| C(11) | 0.098(4)   | 0.101(4)   | 0.060(3)   | 0.005(3)    | 0.020(3)    | -0.021(3)   |
| C(12) | 0.111(4)   | 0.096(4)   | 0.056(2)   | 0.008(2)    | 0.011(3)    | -0.010(3)   |
| C(13) | 0.060(2)   | 0.123(4)   | 0.052(2)   | -0.007(3)   | 0.000(2)    | 0.008(3)    |
| C(14) | 0.082(3)   | 0.105(4)   | 0.067(3)   | -0.039(3)   | -0.003(3)   | 0.005(3)    |
| C(15) | 0.120(4)   | 0.071(3)   | 0.074(3)   | -0.016(2)   | -0.013(3)   | -0.020(3)   |
| C(16) | 0.099(4)   | 0.078(3)   | 0.079(3)   | -0.007(3)   | -0.013(3)   | -0.039(3)   |
| C(17) | 0.069(2)   | 0.062(2)   | 0.067(2)   | -0.0026(18) | 0.005(2)    | -0.023(2)   |
| C(18) | 0.070(2)   | 0.049(2)   | 0.062(2)   | 0.0077(16)  | 0.002(2)    | -0.0141(17) |
| C(19) | 0.0477(17) | 0.0423(17) | 0.0457(17) | 0.0023(13)  | 0.0033(15)  | -0.0047(14) |
| C(20) | 0.059(2)   | 0.0474(19) | 0.0537(19) | -0.0010(15) | 0.0022(18)  | -0.0007(15) |
| C(21) | 0.084(3)   | 0.061(2)   | 0.054(2)   | -0.0111(17) | 0.003(2)    | -0.015(2)   |
| C(22) | 0.068(2)   | 0.073(2)   | 0.055(2)   | 0.004(2)    | -0.012(2)   | -0.018(2)   |
| C(23) | 0.0505(19) | 0.069(2)   | 0.065(2)   | 0.0068(19)  | -0.0096(19) | -0.0023(17) |
| C(24) | 0.0523(19) | 0.0515(18) | 0.0565(19) | -0.0011(15) | -0.0019(17) | -0.0006(16) |

**Table S4.** Crystal data and structure refinement for **2-Ph-18c6**.

---

|                                                      |                                                    |
|------------------------------------------------------|----------------------------------------------------|
| CCDC-Nr                                              | 2157856                                            |
| Empirical formula                                    | C <sub>18</sub> H <sub>28</sub> K N O <sub>9</sub> |
| Formula weight [g/mol]                               | 441.51                                             |
| Crystal system                                       | Tetragonal                                         |
| Space group                                          | P4 <sub>3</sub> (78)                               |
| Lattice parameters [Å]                               |                                                    |
| a                                                    | 8.0124(7)                                          |
| b                                                    | 8.0124(7)                                          |
| c                                                    | 33.848(3)                                          |
| α                                                    | 90                                                 |
| β                                                    | 90                                                 |
| γ                                                    | 90                                                 |
| Density [g/cm <sup>3</sup> ]                         | 1.35                                               |
| Crystal size [mm <sup>3</sup> ]                      | 0.601 x 0.488 x 0.439                              |
| Volume [Å <sup>3</sup> ]                             | 2173.0(4)                                          |
| Z                                                    | 4                                                  |
| Temperature [K]                                      | 170(2)                                             |
| Diffraction Device                                   | XtaLAB Mini (ROW)                                  |
| Radiation Type                                       | 0.71073 Å ( Mo K/ fine-focus sealed X-ray tube)    |
| F(000)                                               | 936                                                |
| Absorption coefficient [mm <sup>-1</sup> ]           | 0.292                                              |
| Absorption correction                                | Analytical                                         |
| Measurement range                                    | 2.5 - 26.5                                         |
| Index range                                          | -10 < h < 10<br>-10 < k < 10<br>-42 < l < 42       |
| Measured reflexes                                    | 16269                                              |
| Independent                                          | 4311                                               |
| Observed                                             | 4084                                               |
| R(int)                                               | 0.0481                                             |
| Completeness (%) / theta (°)                         | 100.0 / 25.242                                     |
| Transmission (min / max)                             | 0.878 / 0.908                                      |
| R1 (observed/all)                                    | 0.0409 / 0.0439                                    |
| wR2 (observed/all)                                   | 0.1000 / 0.1031                                    |
| Goof = S                                             | 1.085                                              |
| Rest electron density max./min. [e-/Å <sup>3</sup> ] | -0.169 / 0.294                                     |

---



**Table S5.** Atomic coordinates and equivalent isotropic displacement parameters [ $\text{\AA}^2$ ] for **2-Ph-18c6**

|        | x          | y          | z           | U(eq)       | S.O.F. |
|--------|------------|------------|-------------|-------------|--------|
| K(1)   | 0.57645(9) | 1.05642(9) | 0.51826(2)  | 0.03275(18) | 1      |
| O(1)   | 0.5181(3)  | 0.7946(3)  | 0.45972(8)  | 0.0394(6)   | 1      |
| O(2)   | 0.2629(3)  | 0.9054(3)  | 0.50959(8)  | 0.0406(6)   | 1      |
| O(3)   | 0.3144(3)  | 1.1475(3)  | 0.56810(9)  | 0.0409(6)   | 1      |
| O(5)   | 0.8328(4)  | 1.2792(3)  | 0.50373(9)  | 0.0436(6)   | 1      |
| O(6)   | 0.7685(3)  | 1.0396(3)  | 0.44656(8)  | 0.0395(6)   | 1      |
| O(8)   | 0.7392(4)  | 1.0215(4)  | 0.59254(9)  | 0.0459(7)   | 1      |
| O(7)   | 0.7660(5)  | 0.8175(4)  | 0.55241(10) | 0.0601(9)   | 1      |
| O(9)   | 0.8898(4)  | 0.8095(4)  | 0.60880(10) | 0.0569(8)   | 1      |
| O(4)   | 0.5748(3)  | 1.3763(3)  | 0.55471(8)  | 0.0410(6)   | 1      |
| N(1)   | 0.7981(4)  | 0.8824(4)  | 0.58510(10) | 0.0390(7)   | 1      |
| C(1)   | 0.3495(5)  | 0.7439(4)  | 0.45419(12) | 0.0359(8)   | 1      |
| C(2)   | 0.2706(5)  | 0.7407(5)  | 0.49441(12) | 0.0430(9)   | 1      |
| C(3)   | 0.1717(6)  | 0.9077(7)  | 0.54538(13) | 0.0569(13)  | 1      |
| C(4)   | 0.1552(5)  | 1.0836(6)  | 0.55953(16) | 0.0552(12)  | 1      |
| C(5)   | 0.3095(5)  | 1.3137(6)  | 0.58131(16) | 0.0512(11)  | 1      |
| C(6)   | 0.4834(6)  | 1.3683(6)  | 0.59034(13) | 0.0464(10)  | 1      |
| C(7)   | 0.7435(5)  | 1.4188(5)  | 0.56152(12) | 0.0387(8)   | 1      |
| C(8)   | 0.8299(5)  | 1.4368(5)  | 0.52290(13) | 0.0433(9)   | 1      |
| C(9)   | 0.9137(6)  | 1.2833(6)  | 0.46672(14) | 0.0520(11)  | 1      |
| C(10)  | 0.9300(5)  | 1.1072(6)  | 0.45214(14) | 0.0483(10)  | 1      |
| C(11)  | 0.7770(6)  | 0.8758(6)  | 0.43164(15) | 0.0487(10)  | 1      |
| C(12)  | 0.6024(6)  | 0.8154(5)  | 0.42350(12) | 0.0450(10)  | 1      |
| C(13)  | 0.3346(5)  | 0.5723(4)  | 0.43557(10) | 0.0326(7)   | 1      |
| C(14)  | 0.4404(5)  | 0.4429(5)  | 0.44580(13) | 0.0447(9)   | 1      |
| C(15)  | 0.4216(6)  | 0.2871(5)  | 0.42889(13) | 0.0459(10)  | 1      |
| C(16)  | 0.2951(5)  | 0.2612(5)  | 0.40161(12) | 0.0428(9)   | 1      |
| C(17)  | 0.1902(5)  | 0.3877(5)  | 0.39192(12) | 0.0434(9)   | 1      |
| C(18)  | 0.2101(5)  | 0.5421(5)  | 0.40889(11) | 0.0371(8)   | 1      |
| H(1)   | 0.290626   | 0.827587   | 0.437267    | 0.043       | 1      |
| H(2A)  | 0.156792   | 0.693309   | 0.492619    | 0.052       | 1      |
| H(2AB) | 0.337291   | 0.669384   | 0.512346    | 0.052       | 1      |
| H(3A)  | 0.230137   | 0.839858   | 0.565533    | 0.068       | 1      |
| H(3AB) | 0.059588   | 0.858913   | 0.541113    | 0.068       | 1      |
| H(4A)  | 0.101145   | 1.152597   | 0.538908    | 0.066       | 1      |
| H(4AB) | 0.084603   | 1.086995   | 0.583525    | 0.066       | 1      |
| H(5A)  | 0.23939    | 1.322212   | 0.605307    | 0.061       | 1      |
| H(5AB) | 0.260692   | 1.386199   | 0.56064     | 0.061       | 1      |
| H(6A)  | 0.481786   | 1.47931    | 0.60317     | 0.056       | 1      |
| H(6AB) | 0.53672    | 1.28806    | 0.608661    | 0.056       | 1      |
| H(7A)  | 0.798272   | 1.330604   | 0.57739     | 0.046       | 1      |
| H(7AB) | 0.750001   | 1.524955   | 0.576411    | 0.046       | 1      |
| H(8A)  | 0.770434   | 1.519171   | 0.506269    | 0.052       | 1      |
| H(8AB) | 0.945393   | 1.477064   | 0.527102    | 0.052       | 1      |
| H(9A)  | 1.02546    | 1.334742   | 0.469419    | 0.062       | 1      |
| H(9AB) | 0.847827   | 1.350363   | 0.447745    | 0.062       | 1      |
| H(10A) | 0.992243   | 1.105586   | 0.426886    | 0.058       | 1      |
| H(10B) | 0.992332   | 1.039458   | 0.471643    | 0.058       | 1      |
| H(11A) | 0.831779   | 0.801715   | 0.451123    | 0.058       | 1      |
| H(11B) | 0.843438   | 0.874086   | 0.406986    | 0.058       | 1      |
| H(12A) | 0.542487   | 0.897515   | 0.40688     | 0.054       | 1      |
| H(12B) | 0.606274   | 0.707862   | 0.409112    | 0.054       | 1      |
| H(14)  | 0.52656    | 0.461315   | 0.464576    | 0.054       | 1      |
| H(15)  | 0.494662   | 0.198544   | 0.435891    | 0.055       | 1      |
| H(16)  | 0.281889   | 0.154733   | 0.389674    | 0.051       | 1      |
| H(17)  | 0.103041   | 0.369452   | 0.373399    | 0.052       | 1      |
| H(18)  | 0.135783   | 0.629701   | 0.401949    | 0.045       | 1      |

**Table S6.** Anisotropic displacement parameters [ $\text{\AA}^2$ ] for **2-Ph-18c6**

|       | $U^{11}$   | $U^{22}$   | $U^{33}$   | $U^{23}$    | $U^{13}$    | $U^{12}$    |
|-------|------------|------------|------------|-------------|-------------|-------------|
| K(1)  | 0.0344(4)  | 0.0328(4)  | 0.0311(3)  | -0.0023(3)  | 0.0037(3)   | -0.0053(3)  |
| O(1)  | 0.0398(14) | 0.0424(14) | 0.0360(14) | -0.0104(12) | 0.0060(12)  | -0.0114(11) |
| O(2)  | 0.0408(14) | 0.0431(14) | 0.0379(15) | -0.0109(12) | 0.0096(12)  | -0.0092(11) |
| O(3)  | 0.0361(13) | 0.0461(15) | 0.0407(14) | -0.0094(13) | -0.0005(12) | -0.0003(11) |
| O(5)  | 0.0490(15) | 0.0395(14) | 0.0423(15) | -0.0048(12) | 0.0085(13)  | -0.0136(12) |
| O(6)  | 0.0370(14) | 0.0380(14) | 0.0437(15) | -0.0094(12) | 0.0093(12)  | -0.0088(11) |
| O(8)  | 0.0612(18) | 0.0348(14) | 0.0416(15) | -0.0016(12) | -0.0013(14) | 0.0022(13)  |
| O(7)  | 0.085(2)   | 0.0411(16) | 0.0542(19) | -0.0091(15) | -0.0140(18) | 0.0113(16)  |
| O(9)  | 0.0400(15) | 0.074(2)   | 0.0563(19) | 0.0188(17)  | 0.0000(14)  | 0.0115(15)  |
| O(4)  | 0.0434(15) | 0.0414(14) | 0.0382(14) | -0.0061(12) | -0.0021(12) | -0.0032(12) |
| N(1)  | 0.0355(16) | 0.0430(18) | 0.0384(17) | 0.0086(15)  | 0.0021(14)  | -0.0019(14) |
| C(1)  | 0.0367(18) | 0.0323(18) | 0.0387(19) | -0.0036(16) | 0.0016(16)  | -0.0069(15) |
| C(2)  | 0.044(2)   | 0.041(2)   | 0.044(2)   | -0.0076(18) | 0.0079(18)  | -0.0119(17) |
| C(3)  | 0.055(3)   | 0.075(3)   | 0.041(2)   | -0.020(2)   | 0.018(2)    | -0.025(2)   |
| C(4)  | 0.035(2)   | 0.072(3)   | 0.058(3)   | -0.026(2)   | 0.010(2)    | -0.008(2)   |
| C(5)  | 0.044(2)   | 0.051(2)   | 0.058(3)   | -0.020(2)   | 0.003(2)    | 0.0063(19)  |
| C(6)  | 0.050(2)   | 0.046(2)   | 0.043(2)   | -0.0188(19) | 0.0045(19)  | 0.0012(19)  |
| C(7)  | 0.048(2)   | 0.0318(18) | 0.0362(19) | -0.0037(16) | -0.0074(17) | -0.0085(16) |
| C(8)  | 0.051(2)   | 0.0330(18) | 0.046(2)   | -0.0028(18) | -0.003(2)   | -0.0136(16) |
| C(9)  | 0.052(2)   | 0.055(3)   | 0.048(2)   | -0.004(2)   | 0.013(2)    | -0.025(2)   |
| C(10) | 0.041(2)   | 0.058(2)   | 0.046(2)   | -0.011(2)   | 0.0137(19)  | -0.0146(19) |
| C(11) | 0.044(2)   | 0.045(2)   | 0.057(3)   | -0.013(2)   | 0.019(2)    | -0.0030(18) |
| C(12) | 0.054(2)   | 0.045(2)   | 0.036(2)   | -0.0159(18) | 0.0129(19)  | -0.0163(19) |
| C(13) | 0.0383(19) | 0.0315(17) | 0.0281(16) | -0.0003(14) | 0.0023(15)  | -0.0052(15) |
| C(14) | 0.047(2)   | 0.042(2)   | 0.045(2)   | -0.0010(18) | -0.0112(19) | -0.0027(17) |
| C(15) | 0.055(2)   | 0.037(2)   | 0.046(2)   | 0.0047(18)  | -0.001(2)   | 0.0027(18)  |
| C(16) | 0.055(2)   | 0.035(2)   | 0.039(2)   | -0.0067(17) | 0.0071(19)  | -0.0150(18) |
| C(17) | 0.042(2)   | 0.050(2)   | 0.039(2)   | -0.0043(18) | -0.0012(18) | -0.0135(18) |
| C(18) | 0.0385(19) | 0.041(2)   | 0.0316(18) | 0.0044(16)  | 0.0002(16)  | 0.0002(16)  |

### 3. Conformational analysis of 2,3-DiPh-18c6 and its complexes

**Table S7.** Relative energies and corresponding Boltzmann populations  $\chi$  of the 15 lowest energy conformers ( $\Sigma\chi > 97\%$ ) of **2,3-DiPh-18c6** at B3LYP/6-311G++(2d,p)/IEFPCM(CHCl<sub>3</sub>). XYZ-coordinates for the first 10 structures can be found below.

| <b>Conformer</b>  | $\Delta E_{ZPC}$<br>[ kcal / mol ] | $\Delta G_{298K}$<br>[ kcal / mol ] | $\chi(\Delta E_{ZPC})$<br>[ % ] | $\chi(\Delta G_{298K})$<br>[ % ] |
|-------------------|------------------------------------|-------------------------------------|---------------------------------|----------------------------------|
| 2,3-DiPh-18c6_c1  | 0.00                               | 0.00                                | 39.29                           | 47.93                            |
| 2,3-DiPh-18c6_c2  | 0.27                               | 0.56                                | 25.01                           | 18.55                            |
| 2,3-DiPh-18c6_c3  | 0.46                               | 0.77                                | 18.09                           | 12.98                            |
| 2,3-DiPh-18c6_c4  | 1.10                               | 1.25                                | 6.10                            | 5.81                             |
| 2,3-DiPh-18c6_c5  | 1.65                               | 2.18                                | 2.43                            | 1.21                             |
| 2,3-DiPh-18c6_c6  | 1.91                               | 1.54                                | 1.57                            | 3.59                             |
| 2,3-DiPh-18c6_c7  | 2.09                               | 1.23                                | 1.15                            | 5.98                             |
| 2,3-DiPh-18c6_c8  | 2.14                               | 2.99                                | 1.05                            | 0.31                             |
| 2,3-DiPh-18c6_c9  | 2.17                               | 3.81                                | 1.01                            | 0.08                             |
| 2,3-DiPh-18c6_c10 | 2.47                               | 2.57                                | 0.60                            | 0.63                             |
| 2,3-DiPh-18c6_c11 | 2.56                               | 3.26                                | 0.52                            | 0.19                             |
| 2,3-DiPh-18c6_c12 | 2.77                               | 4.09                                | 0.37                            | 0.05                             |
| 2,3-DiPh-18c6_c13 | 2.78                               | 3.04                                | 0.36                            | 0.28                             |
| 2,3-DiPh-18c6_c14 | 2.82                               | 4.48                                | 0.34                            | 0.02                             |
| 2,3-DiPh-18c6_c15 | 2.93                               | 3.33                                | 0.28                            | 0.17                             |

$\Delta E_{ZPC}$  referenced to -1384.992584 hartree /  $\Delta G_{298K}$  referenced to -1385.055856 hartree

**Table S8.** Relative energies and corresponding Boltzmann populations  $\chi$  of the 8 lowest energy conformers ( $\Sigma\chi > 97\%$ ) of **K<sup>+</sup>/2,3-DiPh-18c6** at B3LYP/6-311G++(2d,p)/IEFPCM(CHCl<sub>3</sub>). XYZ-coordinates for the structures can be found below.

| <b>Conformer</b>                  | $\Delta E_{ZPC}$<br>[ kcal / mol ] | $\Delta G_{298K}$<br>[ kcal / mol ] | $\chi(\Delta E_{ZPC})$<br>[ % ] | $\chi(\Delta G_{298K})$<br>[ % ] |
|-----------------------------------|------------------------------------|-------------------------------------|---------------------------------|----------------------------------|
| K <sup>+</sup> / 2,3-DiPh-18c6_c1 | 0.00                               | 0.00                                | 84.15                           | 85.94                            |
| K <sup>+</sup> / 2,3-DiPh-18c6_c2 | 1.38                               | 1.48                                | 8.18                            | 7.11                             |
| K <sup>+</sup> / 2,3-DiPh-18c6_c3 | 2.55                               | 2.72                                | 1.14                            | 0.88                             |
| K <sup>+</sup> / 2,3-DiPh-18c6_c4 | 2.43                               | 2.11                                | 1.40                            | 2.44                             |
| K <sup>+</sup> / 2,3-DiPh-18c6_c5 | 2.71                               | 2.91                                | 0.86                            | 0.63                             |
| K <sup>+</sup> / 2,3-DiPh-18c6_c6 | 2.94                               | 3.40                                | 0.59                            | 0.27                             |
| K <sup>+</sup> / 2,3-DiPh-18c6_c7 | 2.89                               | 3.43                                | 0.64                            | 0.26                             |
| K <sup>+</sup> / 2,3-DiPh-18c6_c8 | 2.94                               | 3.52                                | 0.59                            | 0.23                             |

$\Delta E_{ZPC}$  referenced to -1984.89502 hartree /  $\Delta G_{298K}$  referenced to -1984.958781 hartree

**Table S9.** Relative energies and corresponding Boltzmann populations  $\chi$  of the 11 lowest energy conformers ( $\Sigma\chi > 97\%$ ) of  $\text{CH}_3\text{NH}_3^+/\text{2,3-DiPh-18c6}$  at B3LYP/6-311G++(2d,p)/IEFPCM( $\text{CHCl}_3$ ). XYZ-coordinates for the structures can be found below.

| <b>Conformer</b>                                      | $\Delta E_{\text{ZPC}}$<br>[ kcal / mol ] | $\Delta G_{298\text{K}}$<br>[ kcal / mol ] | $\chi(\Delta E_{\text{ZPC}})$<br>[ % ] | $\chi(\Delta G_{298\text{K}})$<br>[ % ] |
|-------------------------------------------------------|-------------------------------------------|--------------------------------------------|----------------------------------------|-----------------------------------------|
| $\text{MeNH}_3^+ / \text{2,3-DiPh-18c6\_c1}$ (2,4,6)  | 0.00                                      | 0.00                                       | 49.93                                  | 54.77                                   |
| $\text{MeNH}_3^+ / \text{2,3-DiPh-18c6\_c2}$ (1,3,5)  | 0.27                                      | 0.94                                       | 31.66                                  | 11.15                                   |
| $\text{MeNH}_3^+ / \text{2,3-DiPh-18c6\_c3}$ (1,3,5)  | 1.53                                      | 0.84                                       | 3.78                                   | 13.27                                   |
| $\text{MeNH}_3^+ / \text{2,3-DiPh-18c6\_c4}$ (1,3,5)  | 1.66                                      | 1.67                                       | 3.01                                   | 3.28                                    |
| $\text{MeNH}_3^+ / \text{2,3-DiPh-18c6\_c5}$ (1,3,5)  | 1.68                                      | 1.48                                       | 2.95                                   | 4.49                                    |
| $\text{MeNH}_3^+ / \text{2,3-DiPh-18c6\_c6}$ (1,3,5)  | 2.11                                      | 1.68                                       | 1.41                                   | 3.23                                    |
| $\text{MeNH}_3^+ / \text{2,3-DiPh-18c6\_c7}$ (1,3,5)  | 2.14                                      | 1.54                                       | 1.36                                   | 4.08                                    |
| $\text{MeNH}_3^+ / \text{2,3-DiPh-18c6\_c8}$ (1,3,5)  | 2.29                                      | 2.12                                       | 1.05                                   | 1.53                                    |
| $\text{MeNH}_3^+ / \text{2,3-DiPh-18c6\_c9}$ (2,4,6)  | 2.47                                      | 2.96                                       | 0.77                                   | 0.37                                    |
| $\text{MeNH}_3^+ / \text{2,3-DiPh-18c6\_c10}$ (2,4,6) | 2.51                                      | 2.93                                       | 0.72                                   | 0.39                                    |
| $\text{MeNH}_3^+ / \text{2,3-DiPh-18c6\_c11}$ (2,4,6) | 2.52                                      | 3.04                                       | 0.70                                   | 0.32                                    |

$\Delta E_{\text{ZPC}}$  referenced to -1481.289975 hartree /  $\Delta G_{298\text{K}}$  referenced to -1481.355318 hartree

### 3.1 Cartesian coordinates of 2,3-DiPh-18c6

#### 2,3-DiPh-18c6\_c1

|   |             |              |             |   |             |             |             |
|---|-------------|--------------|-------------|---|-------------|-------------|-------------|
| O | 0.11597500  | 0.87584600   | 3.03782600  | H | 1.46340900  | -0.52961100 | 1.42235800  |
| O | -1.17435700 | -1.02007600  | 1.30639100  | C | -1.08204500 | -3.30293300 | 0.06099900  |
| O | -0.82270900 | -0.41122900  | -1.55290900 | H | -1.06185500 | -4.33878800 | 0.43029700  |
| O | 1.61291800  | 1.00633800   | -2.37929300 | H | -1.00442300 | -3.33411600 | -1.03388000 |
| O | 2.79405000  | 3.01598100   | -0.58500300 | C | 0.10653400  | -2.56977800 | 0.63592300  |
| O | 2.23120400  | 2.47201600   | 2.18333400  | H | 0.97298600  | -3.24031600 | 0.59939800  |
| C | 2.23051600  | 0.30827000   | 4.14607000  | C | -0.08616700 | -2.31765400 | 1.68660000  |
| C | 2.69665700  | -0.47271800  | 3.08700100  | C | -4.68781100 | -2.68179300 | 0.47773300  |
| H | 2.23313200  | -0.37473100  | 2.11407600  | H | -4.61126600 | -2.53336600 | 1.56300700  |
| C | 3.74229700  | -1.36923200  | 3.28147000  | H | -5.55051100 | -3.33596700 | 0.28357800  |
| H | 4.09325600  | -1.975208400 | 2.45181200  | C | -3.43719100 | -3.35822600 | -0.02995300 |
| C | 4.33988900  | -1.49399000  | 4.53385200  | H | -3.43842000 | -3.69030000 | -1.12808400 |
| H | 5.15426000  | -2.19346300  | 4.68242500  | H | -3.43398100 | -4.40118800 | 0.31936800  |
| C | 3.87891700  | -0.72129600  | 5.59494800  | C | -5.94400800 | 0.68197300  | -0.32386600 |
| H | 4.33025200  | -0.81749100  | 6.57566800  | H | -6.89588000 | 1.18649600  | -0.10273200 |
| C | 2.82647800  | 0.16953000   | 5.39973000  | H | -5.86189600 | 0.57235000  | -1.47722900 |
| H | 2.46243300  | 0.75911700   | 6.23527100  | C | -5.94400200 | -0.68196900 | 0.32391400  |
| C | 1.10638500  | 1.31387600   | 3.94976000  | H | -6.89588300 | -1.18648700 | 0.10280700  |
| H | 0.64430400  | 1.50540800   | 4.92898800  | C | -5.86186000 | -0.57234600 | 1.41327500  |
| C | 1.63205500  | 2.68125900   | 3.44859900  | H | -4.68781000 | 2.68179300  | -0.47772500 |
| H | 2.39967100  | 2.99473400   | 4.17075600  | H | -4.61127900 | 2.53335600  | -1.56299900 |
| C | 3.06824400  | 3.53014900   | 1.73975500  | C | -5.55050800 | 3.33596300  | -0.28356300 |
| H | 3.83864500  | 3.74356700   | 2.49391800  | C | -3.43718500 | 3.35822800  | 0.02994000  |
| H | 2.48677700  | 4.44500700   | 1.57719800  | H | -3.43840200 | 3.36904600  | 1.12807100  |
| C | 3.74996500  | 3.11645100   | 0.45683000  | H | -3.43397800 | 4.40118600  | -0.31939400 |
| H | 4.51440900  | 3.86669900   | 0.20623500  | O | 0.37177900  | 1.38499800  | 0.10921000  |
| H | 4.25328700  | 2.15165300   | 0.60042900  | O | -2.29185900 | 2.67885000  | -0.45627600 |
| C | 3.34813100  | 2.55024000   | -1.80415300 | O | 0.43742300  | 1.43761800  | 0.17745100  |
| H | 3.95868100  | 1.65523200   | -1.62763800 | O | 0.37177900  | -1.38499400 | -0.10923700 |
| C | 3.99515300  | 3.32124900   | -2.24702300 | O | -2.29186000 | -2.67885500 | 0.45626000  |
| H | 2.24013600  | 2.21493500   | -2.77484500 | O | -4.85543500 | -1.43761800 | -0.17743400 |
| H | 2.66903100  | 2.10691200   | -3.78174000 | C | 2.80214000  | 1.47907700  | -0.03783800 |
| C | 0.53821400  | 0.63627200   | -3.22601900 | C | 3.77111000  | 1.67958200  | -1.01944600 |
| H | 0.90041500  | 0.48524700   | -4.25351500 | C | 3.00952600  | 2.02367800  | 1.23160200  |
| H | -0.22206100 | 1.42843400   | -3.24745900 | C | 4.93189400  | 2.39613700  | -0.73991400 |
| C | -0.08157200 | -0.65169900  | -2.73663500 | H | 3.61919500  | 1.27072500  | -2.01254400 |
| H | -0.74115100 | -1.04759200  | -3.52277700 | C | 4.16608600  | 2.74191600  | 1.51455400  |
| H | 0.70628700  | -1.39354400  | -2.54998200 | H | 2.25339300  | 1.89564300  | 1.99716700  |
| C | -1.39971300 | -1.58814100  | -1.01161200 | C | 5.13328500  | 2.92802800  | 0.52941300  |
| H | -0.62374400 | -2.34079300  | -0.81867200 | H | 5.67493400  | 2.54227400  | -1.51513600 |
| H | -2.12084100 | -2.01783100  | -1.72213600 | H | 4.31287900  | 3.15879300  | 2.50421800  |
| C | -2.11829000 | -1.25463500  | 0.27444700  | H | 6.03415400  | 3.48872100  | 0.74917900  |
| H | -2.74347400 | -0.36534200  | 0.12144600  | C | 2.80213700  | -1.47907500 | 0.03783900  |
| H | -2.77806200 | -2.09133900  | 0.54617900  | C | 3.77109200  | -1.67958600 | 1.01946100  |
| C | -1.76233400 | -0.48568200  | 2.48074000  | C | 3.00953900  | -2.02367400 | -1.23159900 |
| H | -2.47772800 | -1.20121700  | 2.91224500  | C | 4.93187800  | -2.39614300 | 0.73994300  |
| H | -2.30521800 | 0.43799700   | 2.24265600  | H | 3.61916500  | -1.27073200 | 2.01226800  |
| C | -0.69033900 | -0.19567800  | 3.50435400  | C | 4.16610100  | -2.74191400 | -1.51453700 |
| H | -1.17338500 | 0.07935200   | 4.45254800  | H | 2.25341700  | -1.89563600 | -1.99717400 |
| H | -0.08484000 | -1.09279000  | 3.67687100  | C | 5.13328600  | -2.92803100 | -0.52938300 |
| C | 0.54141200  | 3.74102800   | 3.42724400  | H | 5.67490800  | -2.54228400 | 1.51517500  |
| C | 0.34408700  | 4.55885100   | 4.54003900  | H | 4.31290600  | -3.15879000 | -2.50420000 |
| H | 0.99080700  | 4.45332900   | 5.40547300  | H | 6.03415700  | -3.48872600 | -0.74913800 |
| C | -0.66866400 | 5.51451900   | 4.55181000  |   |             |             |             |
| H | -0.80797700 | 6.14320300   | 5.42365600  |   |             |             |             |
| C | -1.49082000 | 5.66856300   | 3.43994500  |   |             |             |             |
| C | -1.29280100 | 4.86266500   | 2.32094100  |   |             |             |             |
| C | -0.28517800 | 3.90369800   | 2.31468100  |   |             |             |             |
| H | -0.12852900 | 3.27739000   | 1.44636800  |   |             |             |             |
| H | -2.27595000 | 6.41562300   | 3.44206900  |   |             |             |             |
| H | -1.92639400 | 4.98098800   | 1.44945000  |   |             |             |             |
| H | 1.50981400  | 3.03443800   | -2.80314500 |   |             |             |             |

#### 2,3-DiPh-18c6\_c2

|   |             |             |             |
|---|-------------|-------------|-------------|
| C | -1.08204000 | 3.30293900  | -0.06104600 |
| H | -1.06185600 | 4.33878500  | -0.43036900 |
| H | -1.00440400 | 3.33414900  | 1.03383200  |
| C | 0.10653300  | 2.56977100  | -0.63596700 |
| H | 0.97298600  | 3.24030800  | -0.59945800 |
| H | -0.08617600 | 2.31763100  | -1.68663800 |
| C | 1.53339300  | 0.69266300  | -0.33872400 |
| H | 1.46342600  | 0.52961400  | -1.42237100 |
| C | 1.53338800  | -0.69266000 | 0.33871100  |

#### 2,3-DiPh-18c6\_c3

|   |             |             |             |
|---|-------------|-------------|-------------|
| C | -0.45256400 | 3.46343300  | -0.07996700 |
| H | -0.38529400 | 4.36588900  | -0.70426100 |
| H | -0.31581100 | 3.76324900  | 0.96707400  |
| C | 0.63926800  | 2.49757700  | -0.47642100 |
| H | 1.58138600  | 3.04325100  | -0.60557500 |
| H | 0.38173300  | 2.02858600  | -1.43364700 |
| C | -0.37333400 | -3.64456700 | 0.69017700  |
| H | -0.51510800 | -4.69930900 | 0.97039500  |
| H | -0.36038900 | -3.58556900 | -0.40637800 |
| C | 0.95910000  | -3.18387400 | 1.24993700  |
| H | 1.69579800  | -3.96461800 | 1.04660900  |
| H | 0.88377200  | -3.06615000 | 2.33546200  |
| C | -3.81325700 | -2.55748000 | 1.47896300  |
| H | -3.58519100 | -2.41337000 | 2.54338500  |
| H | -4.75103600 | -3.12726100 | 1.40751400  |
| C | -2.71258700 | -3.36083400 | 0.82792900  |
| H | -2.82242100 | -3.32503000 | -0.26387000 |
| H | -2.81109200 | -4.40883500 | 1.14446400  |

|   |             |             |             |
|---|-------------|-------------|-------------|
| C | -5.16040800 | 0.76228100  | 0.61603100  |
| H | -6.10567400 | 1.24100900  | 0.91056400  |
| H | -5.21417400 | 0.53716900  | -0.45825700 |
| C | -5.00118600 | -0.52219000 | 1.39361400  |
| H | -5.95069400 | -1.07538500 | 1.35525300  |
| H | -4.78222500 | -0.29748300 | 2.44595200  |
| C | -4.07438800 | 2.79442400  | 0.08108300  |
| H | -4.16559700 | 2.52606300  | -0.97961800 |
| H | -4.92803700 | 3.43552800  | 0.34465700  |
| C | -2.79338500 | 3.56430800  | 0.29826400  |
| H | -2.63149300 | 3.72754500  | 1.37202300  |
| H | -2.88493200 | 4.54758700  | -0.18556800 |
| O | -1.71199500 | 2.83609200  | -0.25578800 |
| O | -4.06832700 | 1.62483500  | 0.88225600  |
| O | -1.43931700 | -2.86496000 | 1.21544000  |
| O | -3.96063500 | -1.30519400 | 0.82949000  |
| C | 5.01692800  | 1.52797400  | 0.43565400  |
| C | 3.65079300  | 1.38089100  | 0.65524400  |
| C | 2.90019500  | 0.48167400  | -0.10433000 |
| C | 3.54630300  | -0.26153800 | -1.09359700 |
| C | 4.91388500  | -0.12312500 | -1.31072200 |
| C | 5.65429600  | 0.77343000  | -0.54540000 |
| H | 5.58484600  | 2.23233000  | 1.03254500  |
| H | 3.15810200  | 1.97060100  | 1.41786400  |
| H | 2.97353300  | -0.95540600 | -1.69802900 |
| H | 5.39932800  | -0.70963800 | -2.08221000 |
| H | 6.71827500  | 0.88802200  | -0.71672700 |
| C | 1.40925200  | 0.30894200  | 0.12618500  |
| H | 0.95688900  | -0.03833300 | -0.81100600 |
| C | 1.02207500  | -0.76273800 | 1.18351300  |
| H | -0.07004700 | -0.75386600 | 1.21734600  |
| O | 1.48212900  | -2.00363500 | 0.64528200  |
| O | 0.76817500  | 1.50736800  | 0.53774200  |
| C | 1.54983600  | -0.49827400 | 2.58158000  |
| C | 2.81306500  | -0.93855100 | 2.98137400  |
| C | 0.76176300  | 0.19900600  | 3.49904100  |
| C | 3.28048100  | -0.68116500 | 4.26645100  |
| H | 3.42738400  | -1.49180500 | 2.28245200  |
| C | 1.22980500  | 0.46603900  | 4.78211300  |
| H | -0.22591200 | 0.53382000  | 3.20442800  |
| C | 2.49217700  | 0.02589500  | 5.17026500  |
| H | 4.26250700  | -1.03232000 | 4.56202000  |
| H | 0.60470800  | 1.00929500  | 5.48141600  |
| H | 2.85590300  | 0.22590700  | 6.17145600  |

**2,3-DiPh-18c6\_c4**

|   |             |             |             |
|---|-------------|-------------|-------------|
| C | 3.95029700  | 3.69264400  | 0.80664700  |
| C | 4.28594200  | 3.00503100  | -0.35520900 |
| C | 3.44500100  | 2.00819700  | -0.84265600 |
| C | 2.26467000  | 1.68138100  | -0.17617500 |
| C | 1.93128700  | 2.38309700  | 0.98411500  |
| C | 2.76802000  | 3.38028700  | 1.47349400  |
| H | 2.49509900  | 3.91809400  | 2.37409400  |
| H | 1.00233400  | 2.15677800  | 1.49286900  |
| C | 1.34819600  | 0.58770100  | -0.70049700 |
| H | 1.61881000  | 0.36366200  | -1.74090900 |
| C | 1.45184500  | -0.73718400 | 0.08619000  |
| C | 2.88084700  | -1.21645100 | 0.28212900  |
| C | 3.59133500  | -1.78219800 | -0.77900700 |
| C | 4.90080500  | -2.21641800 | -0.60362600 |
| C | 5.51940500  | -2.09232900 | 0.63828200  |
| C | 4.81714800  | -1.53709900 | 1.70292500  |
| C | 3.50532500  | -1.10625100 | 1.52372100  |
| H | 2.96266600  | -0.67776100 | 2.35913800  |
| H | 5.28732100  | -1.44314000 | 2.67481700  |
| H | 6.53935400  | -2.43162200 | 0.77548400  |
| H | 5.43949500  | -2.65385600 | -1.43625200 |
| H | 3.11000300  | -1.89376100 | -1.74341700 |
| H | 0.99386800  | -0.56771900 | 1.06939600  |
| O | 0.67315500  | -1.68200200 | -0.64098100 |
| C | 0.33874500  | -2.85074000 | 0.08822800  |
| C | -0.60484300 | -3.70126200 | -0.74780800 |
| H | -0.22451200 | -3.74783400 | -1.77040300 |
| O | -1.92879100 | -3.18672100 | -0.83444900 |
| C | -2.76826500 | -3.59530400 | 0.23655600  |

|   |             |              |             |
|---|-------------|--------------|-------------|
| C | -4.12456500 | -2.94329300  | 0.10849400  |
| H | -4.47099200 | -3.00898400  | -0.93142800 |
| O | -4.05133900 | -1.548934700 | 0.52488700  |
| C | -5.30401300 | -0.92755100  | 0.46265200  |
| C | -5.17817100 | 0.46356200   | 1.03602100  |
| H | -4.65684000 | 0.41492300   | 2.00081600  |
| O | -4.47060700 | 1.30335000   | 0.13755500  |
| C | -4.21144900 | 2.58828600   | 0.68301600  |
| C | -3.45896800 | 3.44894500   | -0.31270000 |
| H | -3.99608700 | 3.47271400   | -1.26911900 |
| O | -2.10665300 | 3.06143400   | -0.51185200 |
| C | -1.91086800 | 2.10946000   | -1.55730800 |
| C | -0.43746200 | 1.81647600   | -1.70134000 |
| H | 0.13148900  | 2.75447100   | -1.70617300 |
| H | 0.27147600  | 1.30335000   | -2.66021800 |
| O | -0.01755100 | 0.97443600   | -0.63605400 |
| H | -2.45643800 | 1.18633700   | -1.34639600 |
| H | -2.28026600 | 2.52673200   | -2.50426100 |
| H | -3.43125100 | 4.46787600   | 0.08293600  |
| H | -3.62311700 | 2.49364500   | 1.60521200  |
| H | -5.15840000 | 3.09075300   | 0.93403400  |
| H | -6.18489800 | 0.86832100   | 1.21341400  |
| H | -5.66034700 | -0.87462600  | -0.57485800 |
| H | -6.05096700 | -1.48063100  | 1.05029200  |
| H | -4.83978800 | -3.48956100  | 0.74022800  |
| H | -2.89422500 | -4.68685600  | 0.21000500  |
| H | -2.33155700 | -3.32765000  | 1.20613600  |
| H | -0.62228600 | -4.72251800  | -0.34584100 |
| H | 1.24023300  | -3.44231400  | 0.30751300  |
| H | -0.12588800 | -2.58257700  | 1.04431700  |
| H | 3.71126100  | 1.47912200   | -1.75108400 |
| H | 5.19894200  | 3.24760200   | -0.88639500 |
| H | 4.60086400  | 4.47172900   | 1.18632100  |

**2,3-DiPh-18c6\_c5**

|   |             |             |             |
|---|-------------|-------------|-------------|
| C | 0.37327400  | 3.21614800  | 2.07078000  |
| H | -0.50599200 | 3.85112800  | 1.90011600  |
| C | 1.24212300  | 3.34085200  | 0.79533400  |
| H | 1.63648000  | 4.36678300  | 0.78981400  |
| C | 3.37943400  | 3.21906100  | 0.00276600  |
| H | 2.99860500  | 2.82900700  | -1.00225900 |
| H | 3.99321400  | 3.47101100  | 0.32566000  |
| C | 4.22735200  | 1.36944500  | -0.03457000 |
| H | 4.45846700  | 1.05031400  | 0.99006600  |
| H | 5.17585700  | 1.58766700  | -0.54635000 |
| C | 3.24581600  | -1.95450900 | -1.29521000 |
| H | 3.81105100  | -2.89327900 | -1.38909700 |
| H | 2.979981300 | -1.61639100 | -2.30557200 |
| C | 4.12476800  | -0.92461100 | -0.62521700 |
| H | 5.10668900  | -0.92144300 | -1.12093600 |
| H | 4.27648200  | -1.19658400 | 0.42779400  |
| C | -0.00766900 | -3.31054900 | -0.20673300 |
| H | 0.30424400  | -3.38536600 | 0.84167000  |
| H | -0.51216500 | -4.24822800 | -0.48003700 |
| C | 1.21653600  | -3.14498000 | -1.07687600 |
| H | 0.91223600  | -2.85910900 | -2.09252200 |
| H | 1.73893700  | -4.11091400 | -1.13784600 |
| C | -1.93174700 | -1.77325700 | 1.79437900  |
| H | -1.06384000 | -2.23299300 | 2.28483500  |
| H | -2.82641300 | -2.05743200 | 2.36916500  |
| C | -2.08174900 | -2.28690500 | 0.37344300  |
| H | -2.82164700 | -1.67593000 | -0.14753000 |
| H | -2.45347800 | -3.31984800 | 0.40498700  |
| C | -1.49271100 | 0.18482700  | 3.04548700  |
| H | -2.33571600 | 0.03124700  | 3.73504600  |
| H | -0.60979800 | -0.30844900 | 3.47253400  |
| C | -1.23083600 | 1.66682600  | 2.91863600  |
| H | -1.15002200 | 2.09359500  | 3.92677400  |
| H | -2.06715100 | 2.15674300  | 2.40328000  |
| O | 2.30898600  | 2.41591300  | 0.91609800  |
| O | -0.02826800 | 1.86323700  | 2.18975600  |
| O | -1.78900800 | -0.36367200 | 1.77265200  |
| O | 3.51756400  | 0.35085700  | -0.71971800 |
| O | 2.07598500  | -2.16367800 | -0.52180700 |
| O | -0.89298400 | -2.21732500 | -0.40410000 |
| C | 1.08985100  | 3.72302900  | 3.31328500  |

|   |             |            |             |
|---|-------------|------------|-------------|
| C | 0.97204700  | 5.06215500 | 3.68784500  |
| C | 1.88647600  | 2.87631000 | 4.08461000  |
| C | 1.64541200  | 5.55294600 | 4.80312100  |
| H | 0.34273100  | 5.72849500 | 3.10637600  |
| C | 2.55621400  | 3.36218700 | 5.20338700  |
| H | 1.97268700  | 1.83525000 | 3.80261100  |
| C | 2.44106400  | 4.70233500 | 5.56468200  |
| H | 1.54080300  | 6.59514500 | 5.08164700  |
| H | 3.17107800  | 2.69321300 | 5.79455700  |
| C | 2.96248200  | 5.07905000 | 6.43679700  |
| C | 0.42213300  | 3.14085000 | -0.46994700 |
| C | -0.07644200 | 4.25059600 | -1.15370200 |
| C | 0.13288300  | 1.86275100 | -0.95127500 |
| C | -0.86235000 | 4.09326400 | -2.29222800 |
| H | 0.15504400  | 5.24940200 | -0.79678200 |
| C | -0.64844900 | 1.70423700 | -2.09129900 |
| H | 0.52367700  | 0.99653700 | -0.43432800 |
| C | -1.15077100 | 2.81615200 | -2.76349400 |
| H | -1.24006200 | 4.96547000 | -2.81332900 |
| H | -0.86809800 | 0.70624800 | -2.45189200 |
| H | -1.75870500 | 2.68799800 | -3.65168700 |

### 2,3-DiPh-18c6\_c6

|   |             |             |             |
|---|-------------|-------------|-------------|
| C | -0.63679600 | 3.79903000  | 0.83867000  |
| H | -0.68075200 | 4.88695800  | 0.67811200  |
| H | -0.88090700 | 3.60162000  | 1.89103000  |
| C | 0.77315700  | 3.33041700  | 0.53457600  |
| H | 1.46948000  | 4.00736800  | 1.03505500  |
| H | 0.95859200  | 3.39153800  | -0.54205800 |
| C | 0.73674800  | 0.92709400  | 0.18978400  |
| H | -0.31833000 | 0.99066100  | -0.08673100 |
| C | 0.85381700  | -0.32865500 | 1.10001600  |
| H | 0.20473900  | -0.12204700 | 1.96028200  |
| C | -0.80334000 | -3.52775800 | 0.28618300  |
| H | -0.76996400 | -4.52761300 | 0.74062800  |
| H | -0.37924000 | -3.59830000 | -0.72352000 |
| C | 0.02358300  | -2.57475700 | 1.11739700  |
| H | 0.95312000  | -3.07204300 | 1.41605400  |
| H | -0.52738500 | -2.30610000 | 2.02734200  |
| C | -4.37598600 | -3.24921100 | -0.66219800 |
| H | -4.76467800 | -3.28393400 | 0.36297600  |
| H | -4.99299700 | -3.90537300 | -1.28087400 |
| C | -2.95368000 | -3.77839300 | -0.69437500 |
| H | -2.54294700 | -3.68025500 | -1.70805800 |
| H | -2.97511600 | -4.84856600 | -0.43797600 |
| C | -4.37719600 | 0.43152200  | -1.00144700 |
| H | -5.41715500 | 0.63065700  | -1.29302300 |
| H | -3.76568400 | 0.40801200  | -1.91241500 |
| C | -4.25282200 | -0.89323200 | -0.27285800 |
| H | -4.96428900 | -0.94016900 | 0.56184000  |
| H | -3.24248200 | -0.98369700 | 0.12790000  |
| C | -3.81705600 | 2.72547700  | -0.67908500 |
| H | -3.41682500 | 2.67090700  | -1.69916100 |
| H | -4.81224500 | 3.18820100  | -0.72612800 |
| C | -2.90379900 | 3.57512300  | 0.17288000  |
| H | -3.19156100 | 3.48537100  | 1.22850800  |
| H | -3.00625700 | 4.62911100  | -0.12088900 |
| O | 1.08441000  | 2.02923000  | 1.03029600  |
| O | -1.56398500 | 3.14351400  | -0.01290500 |
| O | -3.89830100 | 1.42780000  | -0.11240500 |
| O | 0.30633400  | -1.40747700 | 0.35120300  |
| O | -2.14495300 | -3.06605500 | 0.22966100  |
| O | -4.52458300 | -1.94094000 | -1.20128400 |
| C | 1.56452000  | 0.87090700  | -1.08112600 |
| C | 0.99496300  | 0.37813600  | -2.25661600 |
| C | 2.89144400  | 1.30438800  | -1.11063500 |
| C | 1.73676900  | 0.30279300  | -3.43150800 |
| H | -0.03842300 | 0.05159200  | -2.25049500 |
| C | 3.63343100  | 1.23922600  | -2.28591600 |
| C | 3.34031400  | 1.70144100  | -0.20909500 |
| C | 3.06018700  | 0.73411200  | -3.44966900 |
| H | 1.27829500  | -0.08334000 | -4.33457500 |
| H | 4.66154700  | 1.58258200  | -2.29247100 |
| H | 3.63790500  | 0.68404500  | -4.36526700 |
| C | 2.25110000  | -0.61347100 | 1.62195500  |

|   |            |             |             |
|---|------------|-------------|-------------|
| C | 2.64792500 | -0.11219000 | 2.86266000  |
| C | 3.15987100 | -1.37664800 | 0.88623100  |
| C | 3.92767600 | -0.35340500 | 3.35336700  |
| H | 1.94910800 | 0.47376000  | 3.44860600  |
| C | 4.43724100 | -1.62733800 | 1.37747300  |
| H | 2.86063800 | -1.77990400 | -0.07295500 |
| C | 4.82717100 | -1.11325700 | 2.61114100  |
| H | 4.21920100 | 0.04543900  | 4.31809300  |
| H | 5.12969400 | -2.22430100 | 0.79522600  |
| H | 5.82205300 | -1.30877000 | 2.99385500  |

### 2,3-DiPh-18c6\_c7

|   |             |             |             |
|---|-------------|-------------|-------------|
| C | -1.30720100 | 2.82758500  | -0.15755300 |
| H | -1.04454200 | 3.88545400  | -0.02568200 |
| H | -1.46185000 | 2.38682300  | 0.83484300  |
| C | -0.19706000 | 2.07179000  | -0.86649900 |
| H | 0.13058400  | 2.60974800  | -1.76494800 |
| H | -0.57174700 | 1.09008200  | -1.15736100 |
| C | 1.92288300  | 1.04464400  | -0.34834500 |
| H | 1.87797000  | 0.88829400  | -1.43117900 |
| C | 1.70242100  | -0.32719200 | 0.33882700  |
| H | 1.66352400  | -0.14431900 | 1.42023500  |
| C | -1.53691400 | -2.08217500 | 0.14650500  |
| H | -1.43424600 | -2.45488600 | -0.88044500 |
| H | -2.14508800 | -1.17436800 | 0.12133100  |
| C | -0.16350500 | -1.78432700 | 0.72306200  |
| H | 0.44394400  | -2.69642700 | 0.74173800  |
| H | -0.25776200 | -1.41299500 | 1.75121000  |
| C | -4.59549800 | -2.85106400 | 0.80406400  |
| H | -4.58752300 | -2.58773400 | 1.87028300  |
| H | -5.46890400 | -3.49551300 | 0.62151900  |
| C | -3.34272000 | -3.63565600 | 0.46402600  |
| H | -3.27231000 | -3.77342400 | -0.62188500 |
| H | -3.43165600 | -4.62168900 | 0.92651700  |
| C | -5.87269200 | 0.33719400  | -0.54733900 |
| H | -6.86553000 | 0.80047500  | -0.45525100 |
| H | -5.71186600 | 0.08584000  | -1.60410800 |
| C | -5.85134500 | -0.91804500 | 0.29193100  |
| H | -6.74948300 | -1.51027300 | 0.06595800  |
| H | -5.88050100 | -0.65049600 | 1.35644200  |
| C | -4.85677200 | 2.46564200  | -0.79505300 |
| H | -4.81795700 | 2.29315800  | -1.87854000 |
| H | -5.76903500 | 3.07335800  | -0.57264100 |
| C | -3.64529600 | 3.25847700  | -0.36234700 |
| H | -3.57608500 | 3.23735000  | 0.73127100  |
| H | -3.75401100 | 4.30409100  | -0.67837100 |
| O | 0.88743900  | 1.94562600  | 0.05123000  |
| O | -2.48047300 | 2.68791800  | -0.94321300 |
| O | -4.86897700 | 1.23017100  | -0.09588400 |
| O | 0.43031700  | -0.79158400 | -0.10387400 |
| O | -2.13609600 | -3.07834200 | 0.96959500  |
| O | -4.68558800 | -1.67745200 | 0.00934900  |
| C | 3.26056600  | 1.66374300  | 0.00117300  |
| C | 4.29808100  | 1.68720100  | -0.92972400 |
| C | 3.47486500  | 2.22756900  | 1.26128500  |
| C | 5.52931600  | 2.25354600  | -0.61020900 |
| H | 4.14484800  | 1.25859600  | -1.91374800 |
| C | 4.70236000  | 2.79618200  | 1.58266500  |
| H | 2.67221700  | 2.23501400  | 1.98862400  |
| C | 5.73526900  | 2.80859300  | 0.64823900  |
| H | 6.32445400  | 2.26377800  | -1.34642500 |
| H | 4.85284100  | 3.23269400  | 2.56322100  |
| H | 6.69148400  | 3.25258200  | 0.89873700  |
| C | 2.80174900  | -1.33285000 | 0.04333400  |
| C | 3.75056500  | -1.65985100 | 1.01132600  |
| C | 2.87936800  | -1.94768300 | -1.20864200 |
| C | 4.76533200  | -2.57204200 | 0.73486900  |
| H | 3.69748800  | -1.19685900 | 1.99048900  |
| C | 3.88993000  | -2.86126300 | -1.48772600 |
| H | 2.13503400  | -1.71968700 | -1.96238500 |
| C | 4.83849500  | -3.17436400 | -0.51690200 |
| H | 5.49417300  | -2.81540300 | 1.49904400  |
| H | 3.93653600  | -3.33179700 | -2.46299300 |
| H | 5.62506600  | -3.88745700 | -0.73369600 |

**2,3-DiPh-18c6\_e8**

|   |             |             |             |
|---|-------------|-------------|-------------|
| C | 2.28160300  | 3.26035800  | 0.49930200  |
| H | 2.23642600  | 4.29900900  | 0.14139200  |
| C | 2.98968800  | 2.45656600  | -0.61904900 |
| H | 4.00254900  | 2.87660500  | -0.69987600 |
| C | 3.97940800  | 0.30950700  | -0.94555300 |
| H | 3.66768400  | 0.24302900  | -1.99410600 |
| H | 4.98398300  | 0.75421800  | -0.91420300 |
| C | 4.04368400  | -1.07182700 | -0.33849300 |
| H | 4.21971600  | -0.98959900 | 0.74196700  |
| H | 4.89177600  | -1.61394500 | -0.78136500 |
| C | 1.44613800  | -3.69653600 | -0.15553100 |
| H | 1.50271800  | -4.71247000 | 0.26258300  |
| H | 1.26299400  | -3.77885700 | -1.22822100 |
| C | 2.78924100  | -3.02467000 | 0.07472600  |
| H | 3.56975100  | -3.69423800 | -0.31804100 |
| H | 2.98663400  | -2.89214100 | 1.14643400  |
| C | -1.06474100 | -2.39985700 | 2.23383200  |
| H | -1.11317900 | -2.47183200 | 3.32995000  |
| H | -1.88523600 | -3.00054300 | 1.81706700  |
| C | 0.27003000  | -2.94951200 | 1.78664100  |
| H | 0.39753100  | -3.95360400 | 2.21700200  |
| H | 1.06639700  | -2.30510100 | 2.17403800  |
| C | -2.46411400 | 0.96242200  | 1.71843600  |
| H | -3.39999900 | 1.42197100  | 2.06882100  |
| H | -2.53754400 | 0.82546700  | 0.63221700  |
| C | -2.30284300 | -0.38588600 | 2.37990800  |
| H | -3.22227000 | -0.96428300 | 2.21032100  |
| H | -2.17157000 | -0.26862100 | 3.46472400  |
| C | -1.31433100 | 2.98193600  | 1.25963200  |
| H | -1.55405000 | 2.76398800  | 0.21173800  |
| H | -2.05058300 | 3.70695700  | 1.63544200  |
| C | 0.06616100  | 3.59014500  | 1.33540800  |
| H | 0.37258000  | 3.70492100  | 2.38159100  |
| H | 0.04038200  | 4.58723400  | 0.87426700  |
| O | 3.07234200  | 1.10690000  | -0.19733400 |
| O | 0.96907700  | 2.74893100  | 0.63166600  |
| O | -1.35444500 | 1.78897200  | 2.02677100  |
| O | 2.83359500  | -1.77196300 | -0.58383900 |
| O | 0.31635500  | -3.01571200 | 0.36945700  |
| O | -1.18479600 | -1.05126600 | 1.82036400  |
| C | 3.06699600  | 3.24287900  | 1.80191100  |
| C | 4.02122400  | 4.22965600  | 2.05138000  |
| C | 2.86422700  | 2.24412600  | 2.75493400  |
| C | 4.77227700  | 4.21504100  | 3.22368600  |
| H | 4.17695300  | 5.02213900  | 1.32607000  |
| C | 3.60787100  | 2.23144100  | 3.93062100  |
| H | 2.11673300  | 1.48406700  | 2.56939900  |
| C | 4.56679600  | 3.21363800  | 4.16768800  |
| H | 5.50882400  | 4.98971700  | 3.40291100  |
| H | 3.43850800  | 1.45212400  | 4.66478400  |
| H | 5.14430100  | 3.20228700  | 5.08466200  |
| C | 2.29954000  | 2.62295400  | -1.96401400 |
| C | 2.72057700  | 3.62174200  | -2.84221400 |
| C | 1.23307900  | 1.80252600  | -2.33516400 |
| C | 2.08251000  | 3.81113000  | -4.06539300 |
| H | 3.55918500  | 4.25590900  | -2.57200200 |
| C | 0.59932200  | 1.98447400  | -3.56000500 |
| H | 0.90835000  | 1.02142200  | -1.66030300 |
| C | 1.01860100  | 2.99088400  | -4.42740200 |
| H | 2.42260500  | 4.59080200  | -4.73711300 |
| H | -0.22536700 | 1.33851700  | -3.83837800 |
| H | 0.52346400  | 3.12988200  | -5.38136900 |

**2,3-DiPh-18c6\_e9**

|   |             |            |             |
|---|-------------|------------|-------------|
| C | -5.83153300 | 0.21754800 | -1.52176400 |
| C | -5.85523200 | 0.12520500 | -0.13357800 |
| C | -4.66649300 | 0.19402100 | 0.58799700  |
| C | -3.44205500 | 0.34661600 | -0.06366700 |
| C | -3.42752100 | 0.44167200 | -1.45588700 |
| C | -4.61430400 | 0.37909900 | -2.17945400 |
| H | -4.58915700 | 0.45465500 | -3.26049200 |
| H | -2.48100300 | 0.56527200 | -1.96525400 |
| C | -2.15249600 | 0.38355800 | 0.74230800  |
| H | -2.39655900 | 0.71183300 | 1.76129000  |

|   |             |             |             |
|---|-------------|-------------|-------------|
| C | -1.50817800 | -1.01618500 | 0.89063300  |
| C | -0.42344500 | -1.03173600 | 1.95663300  |
| C | 0.87569100  | -0.60282600 | 1.67854200  |
| C | 1.84043400  | -0.59965500 | 2.68113800  |
| C | 1.52231000  | -1.01874500 | 3.97081000  |
| C | 0.23029500  | -1.45070600 | 4.25385800  |
| C | -0.73257500 | -1.46047700 | 3.24839800  |
| H | -1.73556100 | -1.81083200 | 3.47130100  |
| H | -0.02606800 | -1.78789700 | 5.25156800  |
| H | 2.27769900  | -1.01375100 | 4.74807800  |
| H | 2.84606500  | -0.26666000 | 2.45336600  |
| H | 1.12882200  | -0.27452500 | 0.67886400  |
| H | -2.31172200 | -1.69277200 | 1.21459400  |
| O | -1.04156400 | -1.41065700 | -0.38827500 |
| C | -0.70121100 | -0.27829000 | -2.49135800 |
| C | -0.12855900 | -3.04230800 | -1.87349600 |
| H | -0.83102500 | -2.67613100 | -2.62440500 |
| O | 1.09754500  | -2.37367100 | -2.13357900 |
| C | 2.24131800  | -2.99446000 | -1.56524000 |
| C | 3.47017700  | -2.18289500 | -1.90216200 |
| H | 3.45784800  | -1.92756600 | -2.96984700 |
| O | 3.50102500  | -1.00352600 | -1.11415500 |
| C | 4.54784300  | -0.12876000 | -1.48654800 |
| C | 4.51214600  | 1.11958700  | -0.62938900 |
| H | 4.50572100  | 0.84359900  | 0.43371300  |
| O | 3.36490000  | 1.88802900  | -0.94429000 |
| C | 3.30060800  | 3.11334800  | -0.23172900 |
| C | 1.97992200  | 3.78949000  | -0.51914500 |
| H | 1.78182000  | 3.74926300  | -1.59765600 |
| O | 0.94766600  | 3.13237400  | 0.19760000  |
| C | -0.35343300 | 3.44308600  | -0.26898300 |
| C | -1.37421900 | 2.62302100  | 0.48431100  |
| H | -1.26835500 | 2.78424400  | 1.56513300  |
| H | -2.37627500 | 2.95500800  | 0.18333300  |
| O | -1.18371700 | 1.24934000  | 0.17863500  |
| H | -0.42817800 | 3.22873200  | -1.34289400 |
| H | -0.57640500 | 4.50942500  | -0.11692000 |
| H | 2.03743800  | 4.84626800  | -0.22189800 |
| H | 3.39660700  | 2.93588900  | 0.84748600  |
| H | 4.12235300  | 3.77455600  | -0.54246000 |
| H | 5.42633900  | 1.70007500  | -0.82214600 |
| H | 4.44975100  | 0.15429900  | -2.54443800 |
| H | 5.52377300  | -0.61337800 | -1.35352200 |
| H | 4.36571700  | -2.79073100 | -1.79052200 |
| H | 2.35916000  | -4.00730000 | -1.97619900 |
| H | 2.15068600  | -3.07731800 | -0.47616600 |
| H | -0.01211900 | -4.12623900 | -2.01209900 |
| H | -1.59691900 | -3.40978900 | -0.36022000 |
| H | 0.01495700  | -3.06382600 | 0.28936900  |
| H | -4.69391600 | 0.13409400  | 1.67142900  |
| H | -6.79792500 | 0.00935900  | 0.38855900  |
| H | -6.75489900 | 0.16990600  | -2.08701700 |

**2,3-DiPh-18c6\_c10**

|   |             |             |             |
|---|-------------|-------------|-------------|
| O | -0.89715600 | -0.45909000 | 2.16654200  |
| O | -0.99035800 | 0.71655400  | -0.54658200 |
| O | 1.51964200  | 1.59247300  | -1.69690700 |
| O | 3.36137300  | 2.79915100  | 0.25049300  |
| C | 3.84779800  | 2.65629200  | 2.59642200  |
| H | 4.58405200  | 2.24130300  | 3.29886700  |
| H | 3.92562700  | 3.74943100  | 2.62949600  |
| C | 4.18474600  | 2.15862600  | 1.21106400  |
| H | 5.24505000  | 2.37844900  | 1.01811400  |
| H | 4.04405500  | 1.07160800  | 1.15837200  |
| C | 3.66141700  | 2.42936300  | -1.08739700 |
| H | 3.95413200  | 1.37375400  | -1.13710400 |
| H | 4.49640700  | 3.03339400  | -1.46834600 |
| C | 2.44097100  | 2.63899200  | -1.95321100 |
| H | 2.73621000  | 2.63727100  | -3.01247500 |
| C | 0.25067200  | 1.78620600  | -2.29349000 |
| H | 0.34136000  | 1.82617900  | -3.38886800 |
| H | -0.19097800 | 2.73243100  | -1.95374600 |
| C | -0.65117400 | 0.63366300  | -1.92069000 |
| H | -1.55939200 | 0.67165700  | -2.53970500 |
| H | -0.13765900 | -0.31419000 | -2.12906700 |
| C | -1.72259100 | -0.40930200 | -0.09434300 |



|   |             |             |             |   |             |            |            |
|---|-------------|-------------|-------------|---|-------------|------------|------------|
| H | -1.14311100 | -1.32886600 | -0.25049500 | H | -1.16912200 | 3.07307000 | 5.68703400 |
| H | -2.66280400 | -0.50106100 | -0.65779800 | H | -1.81523000 | 3.29754600 | 8.05808200 |
| C | -2.05452000 | -0.25651000 | 1.37033500  | H | -0.50065600 | 2.14721600 | 9.81895100 |
| H | -2.47051100 | 0.74372500  | 1.55105000  | C | 0.92053200  | 1.67224700 | 4.62243100 |
| H | -2.82430100 | -0.99577200 | 1.63532600  | H | 0.13456500  | 2.10500200 | 3.99435500 |
| C | -1.17098600 | -0.30003900 | 3.54764900  | C | 2.22436600  | 2.44664200 | 4.32529900 |
| H | -1.94810900 | -1.01300500 | 3.86316800  | H | 3.01831400  | 2.01434500 | 4.94988100 |
| H | -1.56423000 | 0.70669900  | 3.74006800  | O | 2.54056200  | 2.23278000 | 2.95750000 |
| C | 0.06095300  | -0.58405100 | 4.38774900  | O | 1.15467700  | 0.31827300 | 4.24365700 |
| H | -0.25851600 | -0.63520600 | 5.43554200  | C | 2.09056500  | 3.92662300 | 4.65471900 |
| H | 0.46712600  | -1.55796800 | 4.10970800  | C | 1.33983200  | 4.76560600 | 3.82781000 |
| H | 1.98981900  | 3.61375600  | -1.72652900 | C | 2.71765800  | 4.47237500 | 5.77362500 |
| C | 0.88307500  | 1.27646100  | 8.41891600  | C | 1.20992800  | 6.11826300 | 4.12308400 |
| C | 1.24576900  | 1.15386000  | 7.08228000  | H | 0.87196400  | 4.35850600 | 2.93932900 |
| C | 0.51562100  | 1.80248400  | 6.08310000  | C | 2.58795400  | 5.82591700 | 6.07392200 |
| C | -0.58984200 | 2.56752700  | 6.45176900  | H | 3.31127000  | 3.83419200 | 6.41891200 |
| C | -0.95450600 | 2.69635300  | 7.78954800  | C | 1.83120300  | 6.65239000 | 5.24977400 |
| C | -0.21773000 | 2.05144000  | 8.77732600  | H | 0.62633000  | 6.75788600 | 3.47113000 |
| H | 1.45883600  | 0.76632000  | 9.18244100  | H | 3.08165300  | 6.23398400 | 6.94814800 |
| H | 2.09564500  | 0.53923300  | 6.80926800  | H | 1.73120100  | 7.70685800 | 5.47880000 |

### 3.2. Cartesian Coordinates of K<sup>+</sup>/2,3-DiPh-18c6

|                                         |             |             |             |                                         |             |             |             |
|-----------------------------------------|-------------|-------------|-------------|-----------------------------------------|-------------|-------------|-------------|
| <b>K<sup>+</sup> / 2,3-DiPh-18c6_c1</b> |             |             |             | H                                       | 5.51173800  | -3.01421800 | -2.35757400 |
| C                                       | -0.24690000 | -3.26337900 | -0.96285800 | H                                       | 6.77142000  | -3.60715200 | -0.30626900 |
| H                                       | -0.35264200 | -4.30643800 | -0.64030600 | C                                       | 3.57731600  | 1.44785300  | 0.13383500  |
| H                                       | 0.05943800  | -3.25929200 | -2.01614300 | C                                       | 4.76794100  | 1.69928700  | -0.54567200 |
| C                                       | 0.80638100  | -2.60300000 | -0.11074000 | C                                       | 3.44842500  | 1.88539300  | 1.45419800  |
| H                                       | 1.68830800  | -3.24879900 | -0.09604000 | C                                       | 5.81830800  | 2.36262800  | 0.08267900  |
| H                                       | 0.44559300  | -2.49278200 | 0.91953100  | H                                       | 4.87865100  | 1.37169900  | -1.57327300 |
| C                                       | 2.23530800  | -0.69149500 | 0.04309000  | C                                       | 4.49396700  | 2.55162400  | 2.08327600  |
| H                                       | 1.96443200  | -0.58065100 | 1.10031800  | H                                       | 2.52162400  | 1.71609500  | 1.98977400  |
| C                                       | 2.43306200  | 0.71561100  | -0.54994500 | C                                       | 5.68397300  | 2.78918200  | 1.39955700  |
| H                                       | 2.66486900  | 0.60400800  | -1.61605200 | H                                       | 6.73823000  | 2.54891100  | -0.45838800 |
| C                                       | 0.00465500  | 3.50912600  | -0.73912000 | H                                       | 4.38084800  | 2.88619100  | 3.10767000  |
| H                                       | 0.12966300  | 4.52305600  | -1.13858000 | H                                       | 6.49900200  | 3.30771500  | 1.88999000  |
| H                                       | -0.09114000 | 3.57980700  | 0.35127500  | K                                       | -1.31682300 | 0.17473800  | -0.89893200 |
| C                                       | 1.22160900  | 2.69769800  | -1.10207600 |                                         |             |             |             |
| H                                       | 2.10832000  | 3.26665500  | -0.80947400 | <b>K<sup>+</sup> / 2,3-DiPh-18c6_c2</b> |             |             |             |
| H                                       | 1.26107800  | 2.53327600  | -2.18601100 | C                                       | -2.21429100 | -4.53287700 | 1.44771500  |
| C                                       | -3.51225100 | 3.01758600  | -1.73686200 | C                                       | -3.46494400 | -4.15720800 | 0.96707300  |
| H                                       | -3.30650100 | 2.99729200  | -2.81410000 | C                                       | -3.61868700 | -2.94672000 | 0.29884600  |
| H                                       | -4.40913400 | 3.62652600  | -1.56913200 | C                                       | -2.53307300 | -2.08931900 | 0.11086500  |
| C                                       | -2.35283800 | 3.63958600  | -1.00079100 | C                                       | -1.28304400 | -2.47814300 | 0.59081800  |
| H                                       | -2.53689400 | 3.63285500  | 0.08068300  | C                                       | -1.12289300 | -3.69167100 | 1.25274000  |
| H                                       | -2.24762300 | 4.68205100  | -1.32469100 | H                                       | -0.14365400 | -3.98115100 | 1.61547500  |
| C                                       | -4.93246200 | -0.36928800 | -1.38326400 | H                                       | -0.42440100 | -1.83897100 | 0.43584200  |
| H                                       | -5.80283700 | -0.84368100 | -1.85283600 | C                                       | -2.76136800 | -0.75556900 | -0.58382600 |
| H                                       | -5.10160200 | -0.33796800 | -0.29960900 | H                                       | -3.62443900 | -0.86730400 | -1.25038200 |
| C                                       | -4.78501500 | 1.02686400  | -1.93276300 | C                                       | -3.12571100 | 0.37547800  | 0.40970300  |
| H                                       | -5.72624600 | 1.57014900  | -1.78293900 | C                                       | -3.76588900 | 1.57174700  | -0.27952200 |
| H                                       | -4.57799100 | 0.98810400  | -3.00929200 | C                                       | -5.14286200 | 1.55807200  | -0.51225000 |
| C                                       | -3.83846600 | -2.47128700 | -1.24612200 | C                                       | -5.76535400 | 2.61125100  | -1.17387400 |
| H                                       | -4.03431800 | -2.51564300 | -0.16755900 | C                                       | -5.01741200 | 3.70355800  | -1.60335100 |
| H                                       | -4.66024900 | -2.97897900 | -1.76594500 | C                                       | -3.64735500 | 3.73342700  | -1.36332600 |
| C                                       | -2.54402100 | -3.17499200 | -1.56690100 | C                                       | -3.02733900 | 2.67354900  | -0.70778300 |
| H                                       | -2.32311600 | -3.10017300 | -2.63877100 | H                                       | -1.96397200 | 2.71710500  | -0.51484200 |
| H                                       | -2.64373100 | -4.23647200 | -1.30984000 | H                                       | -3.05909100 | 4.58479700  | -1.68474500 |
| O                                       | 1.14201400  | -1.31782800 | -0.64817900 | H                                       | -5.50006900 | 4.52869100  | -2.11291600 |
| O                                       | -1.49072700 | -2.58451900 | -0.80916300 | H                                       | -6.83486400 | 2.58310600  | -1.34456800 |
| O                                       | -3.75198800 | -1.11410600 | -1.67073100 | H                                       | -5.73800700 | 0.71829700  | -0.16851900 |
| O                                       | 1.19668300  | 1.43624000  | -0.42259000 | H                                       | -3.86365500 | -0.05705000 | 1.09958500  |
| O                                       | -1.16302100 | 2.91180000  | -1.29751100 | O                                       | -1.94456000 | 0.69529800  | 1.13848500  |
| O                                       | -3.72087100 | 1.69211900  | -1.25756100 | C                                       | -2.16529200 | 1.42074400  | 2.35011800  |
| C                                       | 3.51040300  | -1.51414600 | -0.05501800 | C                                       | -0.90583200 | 1.38800000  | 3.18182400  |
| C                                       | 4.21938800  | -1.86243400 | 1.09310600  | H                                       | -0.63055300 | 0.35190900  | 3.41418300  |
| C                                       | 3.98634100  | -1.93990500 | -1.29742400 | O                                       | 0.15717700  | 2.02192500  | 2.47234400  |
| C                                       | 5.39090000  | -2.60945600 | 1.00586400  | C                                       | 1.36097000  | 2.08799400  | 3.23473600  |
| H                                       | 3.85598200  | -1.54566200 | 2.06429900  | C                                       | 2.45339100  | 2.71153600  | 2.40203600  |
| C                                       | 5.15342000  | -2.68977500 | -1.38779900 | H                                       | 3.33764100  | 2.86126000  | 3.03333200  |
| H                                       | 3.43567600  | -1.69507500 | -2.19820000 | O                                       | 2.77032900  | 1.84632400  | 1.31318600  |
| C                                       | 5.86128100  | -3.02377900 | -0.23557400 | C                                       | 3.81553100  | 2.35254700  | 0.48575200  |
| H                                       | 5.93208100  | -2.87021100 | 1.90745400  | C                                       | 4.10527700  | 1.36440400  | -0.61705600 |

|   |             |              |             |                                         |             |             |             |
|---|-------------|--------------|-------------|-----------------------------------------|-------------|-------------|-------------|
| H | 4.34622000  | 0.38231200   | -0.19220800 | H                                       | -0.16355400 | 4.31313900  | -1.23847900 |
| O | 2.96770300  | 1.26043200   | -1.47056400 | H                                       | 0.30012000  | 2.81775500  | -2.06708200 |
| C | 3.16810500  | 0.36252600   | -2.56051700 | H                                       | -2.23082500 | 4.14629300  | -2.50508000 |
| C | 1.91787600  | 0.31374800   | -3.40368200 | H                                       | -4.31654600 | 2.99508700  | -2.94569500 |
| H | 1.63563800  | 1.32589400   | -3.71954900 | H                                       | -4.13245100 | 3.24607800  | -1.19516600 |
| O | 0.86112800  | -0.27591900  | -2.64925900 | H                                       | -5.78357000 | 1.08826600  | -2.53722400 |
| C | -0.36674100 | -0.362085300 | -3.37209600 | H                                       | -6.24015800 | -0.95749800 | -1.34692300 |
| C | -1.40487900 | -1.05516300  | -2.54106700 | H                                       | -4.69726400 | -1.13755300 | -2.21001800 |
| H | -2.32908600 | -1.13177700  | -3.12547200 | H                                       | -5.49493800 | -2.72417200 | 0.00800900  |
| H | -1.06600800 | -2.06610000  | -2.29402000 | H                                       | -3.49770700 | -3.01630200 | -1.51374400 |
| O | -1.64380100 | -0.30741900  | -1.34643000 | H                                       | -3.48917200 | -4.08746300 | -0.10168200 |
| H | -0.22571200 | -0.89528400  | -4.30805500 | H                                       | -1.08180100 | -3.08683900 | -1.67869100 |
| H | -0.70756700 | 0.67178900   | -3.62098300 | H                                       | 0.23019900  | -2.58699600 | 1.04175800  |
| H | 2.11737000  | -0.28257400  | -4.30220200 | H                                       | 1.05842400  | -3.21660800 | -0.39667800 |
| H | 4.00359900  | 0.70595200   | -3.18249600 | H                                       | 3.55185400  | 1.78217500  | -2.30948100 |
| H | 3.40869200  | -0.63879100  | -2.18291900 | H                                       | 5.76179800  | 2.76710800  | -1.82912300 |
| H | 4.97395500  | 1.71513000   | -1.18735700 | H                                       | 6.55697300  | 2.95362800  | 0.51193900  |
| H | 4.72707800  | 2.50048200   | 1.07734500  | K                                       | -1.94219600 | 0.27698200  | 0.04062200  |
| H | 3.52183800  | 3.32002800   | 0.05997300  |                                         |             |             |             |
| H | 2.13200200  | 3.68972900   | 2.02340100  |                                         |             |             |             |
| H | 1.20410200  | 2.69912000   | 4.13190300  | <b>K<sup>+</sup> / 2,3-DiPh-18c6_c4</b> |             |             |             |
| H | 1.65882300  | 1.08136600   | 3.55277900  | C                                       | -4.80054400 | 1.24563400  | 1.66332900  |
| H | -1.09606000 | 1.91344700   | 4.12581300  | H                                       | -5.37787100 | 0.50377300  | 1.09808500  |
| H | -2.97332200 | 0.95377100   | 2.92447100  | H                                       | -5.36354100 | 1.50344800  | 2.56878800  |
| H | -2.45191500 | 2.45331000   | 2.12783500  | C                                       | -4.60567500 | 2.49144600  | 0.83663500  |
| H | -4.59464500 | -2.66855600  | -0.08534600 | H                                       | -3.97368500 | 3.20160800  | 1.38112000  |
| H | -4.31895600 | -4.80989300  | 1.10298400  | H                                       | -5.58114200 | 2.96089400  | 0.66223200  |
| H | -2.08932200 | -5.47764900  | 1.96277900  | C                                       | -3.77597000 | 3.23674500  | -1.28612400 |
| K | 0.52579900  | 0.98758600   | -0.13735000 | H                                       | -3.72935800 | 2.81650200  | -2.29220500 |
|   |             |              |             | H                                       | -4.61436700 | 3.94108700  | -1.24778700 |
|   |             |              |             | C                                       | -2.48609200 | 3.97370800  | -0.98683600 |
|   |             |              |             | H                                       | -2.47782300 | 4.37064800  | 0.03556700  |
|   |             |              |             | H                                       | -2.39480900 | 4.82238400  | -1.67659000 |
|   |             |              |             | C                                       | 0.97916800  | 2.71036800  | -1.25177700 |
|   |             |              |             | H                                       | 1.92886200  | 3.25092500  | -1.20494900 |
|   |             |              |             | H                                       | 0.85563700  | 2.32081100  | -2.26974500 |
|   |             |              |             | C                                       | -0.12690500 | 3.68163000  | -0.92800700 |
|   |             |              |             | H                                       | -0.00872800 | 4.56356600  | -1.56942100 |
|   |             |              |             | H                                       | -0.05638000 | 4.00645800  | 0.11740300  |
|   |             |              |             | C                                       | 1.93478100  | -0.47630100 | 0.40629600  |
|   |             |              |             | H                                       | 1.88560900  | -0.14887900 | 1.45004100  |
|   |             |              |             | C                                       | 2.12823200  | 0.77240400  | -0.47559100 |
|   |             |              |             | H                                       | 2.17582600  | 0.44109200  | -1.51997000 |
|   |             |              |             | C                                       | -0.30485800 | -1.93723900 | 2.13441600  |
|   |             |              |             | H                                       | 0.33805000  | -1.82616800 | 2.73936400  |
|   |             |              |             | H                                       | -0.43824700 | -2.87835300 | 2.68300100  |
|   |             |              |             | C                                       | 0.32199400  | -2.24458800 | 0.79027700  |
|   |             |              |             | H                                       | -0.39875900 | -2.78204700 | 0.17155800  |
|   |             |              |             | H                                       | 1.18934300  | -2.89219700 | 0.93627400  |
|   |             |              |             | C                                       | -2.23981500 | -0.97007000 | 3.13110100  |
|   |             |              |             | H                                       | -2.32478800 | -1.84903900 | 3.78133200  |
|   |             |              |             | H                                       | -1.67312700 | -0.19885200 | 3.66722500  |
|   |             |              |             | C                                       | -3.62537000 | -0.47381200 | 2.80128500  |
|   |             |              |             | H                                       | -4.16105100 | -0.26469100 | 3.73543100  |
|   |             |              |             | H                                       | -4.18044000 | -1.24426100 | 2.25184900  |
|   |             |              |             | O                                       | -4.01127400 | 2.13337100  | -0.41054800 |
|   |             |              |             | O                                       | -3.52697400 | 0.70940000  | 2.01348500  |
|   |             |              |             | O                                       | -1.56931300 | -1.31572100 | 1.92213800  |
|   |             |              |             | O                                       | -1.39431900 | 3.07531600  | -1.16788400 |
|   |             |              |             | O                                       | 0.98167300  | 1.62372300  | -0.31794900 |
|   |             |              |             | O                                       | 0.68333000  | -1.07870200 | 0.03550800  |
|   |             |              |             | C                                       | 3.41588500  | 1.50208700  | -0.12559900 |
|   |             |              |             | C                                       | 4.50320100  | 1.48576000  | -0.99739600 |
|   |             |              |             | C                                       | 3.52509600  | 2.20561800  | 1.07625200  |
|   |             |              |             | C                                       | 5.68400400  | 2.14801900  | -0.67303400 |
|   |             |              |             | H                                       | 4.43023700  | 0.94878400  | -1.93639900 |
|   |             |              |             | C                                       | 4.70157500  | 2.87129400  | 1.40146900  |
|   |             |              |             | H                                       | 2.68145600  | 2.24520200  | 1.75539300  |
|   |             |              |             | C                                       | 5.78621900  | 2.84150900  | 0.52817000  |
|   |             |              |             | H                                       | 6.52079100  | 2.12483100  | -1.36078000 |
|   |             |              |             | H                                       | 4.77274100  | 3.41438400  | 2.33645100  |
|   |             |              |             | H                                       | 6.70303500  | 3.36011200  | 0.78153900  |
|   |             |              |             | C                                       | 3.09742400  | -1.44255800 | 0.24726800  |
|   |             |              |             | C                                       | 4.00658200  | -1.63514700 | 1.28600300  |
|   |             |              |             | C                                       | 3.27149300  | -2.15350300 | -0.94267700 |
|   |             |              |             | C                                       | 5.07851300  | -2.51128700 | 1.13926700  |
|   |             |              |             | H                                       | 3.88085800  | -1.09296900 | 2.21645300  |

  

|                                         |             |             |             |  |  |  |  |
|-----------------------------------------|-------------|-------------|-------------|--|--|--|--|
| <b>K<sup>+</sup> / 2,3-DiPh-18c6_c3</b> |             |             |             |  |  |  |  |
| C                                       | 5.58742800  | 2.51963500  | 0.29911400  |  |  |  |  |
| C                                       | 5.14161500  | 2.41438400  | -1.01385800 |  |  |  |  |
| C                                       | 3.89360400  | 1.85930900  | -1.28334700 |  |  |  |  |
| C                                       | 3.08191200  | 1.39650500  | -0.24912200 |  |  |  |  |
| C                                       | 3.53533400  | 1.51138600  | 1.06739800  |  |  |  |  |
| C                                       | 4.77887100  | 2.06941200  | 1.34023000  |  |  |  |  |
| H                                       | 5.11811300  | 2.15365100  | 2.36581600  |  |  |  |  |
| H                                       | 2.90789700  | 1.17560500  | 1.88476400  |  |  |  |  |
| C                                       | 1.72576400  | 0.78019300  | -0.54965800 |  |  |  |  |
| H                                       | 1.50391700  | 0.91075600  | -1.61453700 |  |  |  |  |
| C                                       | 1.72074400  | -0.73105600 | -0.24907000 |  |  |  |  |
| C                                       | 2.78571000  | -1.46319900 | -1.04995600 |  |  |  |  |
| C                                       | 3.91795800  | -1.98034100 | -0.42278300 |  |  |  |  |
| C                                       | 4.89669200  | -2.64380100 | -1.15765600 |  |  |  |  |
| C                                       | 4.74785800  | -2.80294800 | -2.53127600 |  |  |  |  |
| C                                       | 3.61492300  | -2.29832600 | -3.16517600 |  |  |  |  |
| C                                       | 2.64100600  | -1.63322700 | -2.42890400 |  |  |  |  |
| H                                       | 1.75625300  | -1.25537700 | -2.92780300 |  |  |  |  |
| H                                       | 3.49025000  | -2.42401200 | -4.23421500 |  |  |  |  |
| H                                       | 5.50692100  | -3.32097400 | -3.10500800 |  |  |  |  |
| H                                       | 5.77175500  | -3.03904700 | -0.65588700 |  |  |  |  |
| H                                       | 4.03912100  | -1.86192100 | 0.64818000  |  |  |  |  |
| H                                       | 1.92340800  | -0.85992900 | 0.82073900  |  |  |  |  |
| O                                       | 0.40880800  | -1.24382100 | -0.53108700 |  |  |  |  |
| C                                       | 0.23419500  | -2.58374400 | -0.05507100 |  |  |  |  |
| C                                       | -1.05074800 | -3.16627600 | -0.58507900 |  |  |  |  |
| H                                       | -1.08425300 | -4.22960500 | -0.31772100 |  |  |  |  |
| O                                       | -2.16701200 | -2.48830900 | -0.01413200 |  |  |  |  |
| C                                       | -3.41730400 | -3.03968500 | -0.42019600 |  |  |  |  |
| C                                       | -4.53306200 | -2.25116800 | 0.23532400  |  |  |  |  |
| H                                       | -4.39662500 | -2.25978400 | 1.31809000  |  |  |  |  |
| O                                       | -4.55121600 | -0.87496900 | -0.14498000 |  |  |  |  |
| C                                       | -5.19973800 | -0.61401700 | -1.38920600 |  |  |  |  |
| C                                       | -5.18271800 | 0.87187800  | -1.64537700 |  |  |  |  |
| H                                       | -5.62377900 | 1.40546300  | -0.79452600 |  |  |  |  |
| O                                       | -3.83742400 | 1.29979600  | -1.84496500 |  |  |  |  |
| C                                       | -3.73492400 | 2.70433400  | -2.06221600 |  |  |  |  |
| C                                       | -2.28980000 | 3.07329800  | -2.28624700 |  |  |  |  |
| H                                       | -1.88164500 | 2.52412100  | -3.14372600 |  |  |  |  |
| O                                       | -1.54144200 | 2.76793900  | -1.11256100 |  |  |  |  |
| C                                       | -0.19094200 | 3.21799400  | -1.17189700 |  |  |  |  |
| C                                       | 0.52785300  | 2.79372500  | 0.09208300  |  |  |  |  |
| H                                       | -0.04958300 | 3.11270900  | 0.96158300  |  |  |  |  |
| H                                       | 1.50074300  | 3.28887500  | 0.13305400  |  |  |  |  |
| O                                       | 0.67675200  | 1.37394700  | 0.23480700  |  |  |  |  |

|   |             |             |             |
|---|-------------|-------------|-------------|
| C | 4.33810600  | -3.03260900 | -1.09069100 |
| H | 2.56221500  | -2.02966200 | -1.75271000 |
| C | 5.24699100  | -3.21149100 | -0.05036200 |
| H | 5.77777600  | -2.64850500 | 1.95529500  |
| H | 4.46086100  | -3.57932400 | -2.01809900 |
| H | 6.07857200  | -3.89611100 | -0.16625100 |
| K | -1.66389300 | 0.51364600  | -0.15597100 |

**K<sup>+</sup> / 2,3-DiPh-18c6\_c5**

|   |             |             |             |
|---|-------------|-------------|-------------|
| C | -2.01394700 | 1.12108800  | -3.66806400 |
| H | -1.99895600 | 1.94913600  | -4.38709800 |
| H | -1.49501700 | 0.26550400  | -4.11711300 |
| C | -3.44809500 | 0.76407900  | -3.36640000 |
| H | -3.96043300 | 0.52942300  | -4.30747500 |
| H | -3.96076000 | 1.61443200  | -2.89955300 |
| C | -4.80166900 | -0.79269700 | -2.18878800 |
| H | -5.35592600 | 0.01590500  | -1.69614200 |
| H | -5.33421900 | -1.06181900 | -3.10926800 |
| C | -4.73589900 | -2.00320200 | -1.29152400 |
| H | -4.14443300 | -2.79498000 | -1.76750300 |
| H | -5.75248600 | -2.38235400 | -1.13078000 |
| C | -3.39137700 | -2.23877700 | 2.13992200  |
| H | -3.38193300 | -3.05075400 | 2.87580800  |
| H | -3.96815300 | -1.40968300 | 2.55284500  |
| C | -4.04863700 | -2.72721600 | 0.86441200  |
| H | -5.04784300 | -3.11071800 | 1.10748800  |
| H | -3.47916000 | -3.54587500 | 0.40785200  |
| C | 0.29714200  | -2.07421600 | 1.79107200  |
| H | 1.05940600  | -2.85675800 | 1.85519500  |
| H | 0.41665400  | -1.40336100 | 2.65025100  |
| C | -1.05908400 | -2.73164300 | 1.83018500  |
| H | -1.09715600 | -3.39753300 | 2.70061700  |
| H | -1.20620200 | -3.33659600 | 0.92869600  |
| C | 1.76707700  | 0.24445400  | -0.70622500 |
| H | 1.52774200  | -0.28516100 | -1.63507700 |
| C | 1.77517600  | -0.78610100 | 0.44053100  |
| H | 2.02696100  | -0.25288700 | 1.36454000  |
| C | 0.60186600  | 2.29283400  | -1.32801800 |
| H | -0.03255400 | 3.01767700  | -0.81498100 |
| H | 1.57347600  | 2.76038000  | -1.50414400 |
| C | -0.01774500 | 1.93638200  | -2.66395900 |
| H | 0.55256600  | 1.15317100  | -3.17778700 |
| H | -0.00101800 | 2.83019300  | -3.30068000 |
| O | -3.47790100 | -0.36222100 | -2.49418800 |
| O | -1.36076400 | 1.50632000  | -2.46116500 |
| O | 0.72653100  | 1.19412600  | -0.41474600 |
| O | -4.14544300 | -1.63695800 | -0.04725400 |
| O | -2.07065100 | -1.73110500 | 1.94514600  |
| O | 0.45355100  | -1.33050200 | 0.57684500  |
| C | 2.80139200  | -1.88147400 | 0.19954800  |
| C | 3.96119900  | -1.95436700 | 0.96899600  |
| C | 2.59138600  | -2.83767000 | -0.79689400 |
| C | 4.90292900  | -2.95424900 | 0.74179600  |
| H | 4.13368600  | -1.22263500 | 1.75016200  |
| C | 3.52819800  | -3.83948700 | -1.02425500 |
| H | 1.68457000  | -2.80625200 | -1.38962100 |
| C | 4.68901500  | -3.89845200 | -0.25669600 |
| H | 5.80015700  | -2.99675800 | 1.34754000  |
| H | 3.35288900  | -4.57539400 | -1.80010600 |
| H | 5.41926200  | -4.67888400 | -0.43386200 |
| C | 3.12821700  | 0.90319800  | -0.85240600 |
| C | 3.91598900  | 0.65527200  | -1.97501300 |
| C | 3.61151400  | 1.76662500  | 0.13412300  |
| C | 5.16920800  | 1.24669800  | -2.10909400 |
| H | 3.55019100  | -0.00960400 | -2.74942600 |
| C | 4.85994900  | 2.36299700  | 0.00076700  |
| H | 3.00355000  | 1.98518800  | 1.00431000  |
| C | 5.64400100  | 2.10190500  | -1.12065800 |
| H | 5.77103100  | 1.04175600  | -2.98627400 |
| H | 5.22212800  | 3.03243300  | 0.77191500  |
| H | 6.61742000  | 2.56608000  | -1.22363700 |
| K | -1.87426900 | 0.07930700  | -0.14610900 |

**K<sup>+</sup> / 2,3-DiPh-18c6\_c6**

|   |            |             |             |
|---|------------|-------------|-------------|
| C | 5.58484800 | -3.32932200 | -0.29609200 |
|---|------------|-------------|-------------|

|   |             |             |             |
|---|-------------|-------------|-------------|
| C | 5.48220200  | -2.64273400 | 0.90897300  |
| C | 4.40284000  | -1.79375000 | 1.13772100  |
| C | 3.42030000  | -1.61491900 | 0.16576300  |
| C | 3.52853400  | -2.31193400 | -1.04003500 |
| C | 4.60263300  | -3.16405400 | -1.26977400 |
| H | 4.67399600  | -3.69990700 | -2.20885000 |
| H | 2.76291200  | -2.19873100 | -1.79879700 |
| C | 2.24531000  | -0.68137200 | 0.41368600  |
| H | 2.26723500  | -0.35084800 | 1.45938500  |
| C | 2.33544500  | 0.56360800  | -0.48835000 |
| C | 3.63391300  | 1.31900800  | -0.24962700 |
| C | 4.63271200  | 1.33890800  | -1.22135200 |
| C | 5.82422900  | 2.02454500  | -1.00187500 |
| C | 6.02515800  | 2.70618300  | 0.19362900  |
| C | 5.02839200  | -2.70051900 | 1.16648800  |
| C | 3.84140400  | 2.01110500  | 0.94591500  |
| H | 3.06635800  | 2.02293700  | 1.70338400  |
| H | 5.17632800  | 3.23421900  | 2.09784000  |
| H | 6.95041000  | -1.29152400 | 0.36571800  |
| H | 6.59193300  | 2.02879300  | -1.76627100 |
| H | 4.48137500  | 0.81164600  | -2.15651800 |
| H | 2.30488000  | 0.22827200  | -1.53202700 |
| O | 1.18838600  | 1.39365400  | -0.24225100 |
| C | 1.11400800  | 2.50331000  | -1.14721300 |
| C | -0.00986400 | 3.42716800  | -0.75350800 |
| H | 0.07159900  | 4.34560800  | -1.34678300 |
| O | -1.26356800 | 2.79828000  | -1.01824700 |
| C | -2.40265800 | 3.61680100  | -0.74436200 |
| C | -2.83664400 | 3.56519300  | 0.70612700  |
| H | -2.02937400 | 3.88471500  | 1.37691400  |
| O | -3.22433300 | 2.22920000  | 1.01230600  |
| C | -3.66477000 | 2.06644900  | 2.35747500  |
| C | -4.11127500 | 0.64047900  | 2.56083300  |
| H | -4.90151800 | 0.38660600  | 1.84365500  |
| O | -2.99756500 | -0.23090300 | 2.38527800  |
| C | -3.33912200 | -1.60371900 | 2.55729400  |
| C | -2.10862100 | -2.44955200 | 2.34806500  |
| H | -1.31405100 | -2.12216600 | 3.02757000  |
| O | -1.69160600 | -2.33509100 | 0.98726000  |
| C | -0.54588200 | -3.12322200 | 0.65877200  |
| C | 0.77338900  | -2.46858900 | 1.01079900  |
| H | 1.56975600  | -3.20386300 | 0.86275400  |
| H | 0.79693400  | -2.15832000 | 2.06255800  |
| O | 0.98669500  | -1.32973800 | 0.16768700  |
| H | -0.59295200 | -3.29227300 | -0.41855100 |
| H | -0.60476300 | -4.09642000 | 1.15851100  |
| H | -2.34872400 | -3.49464400 | 2.57606300  |
| H | -3.72136600 | -1.77122900 | 3.57122900  |
| H | -4.12021200 | -1.88864500 | 1.84186800  |
| H | -4.51910900 | 0.53465100  | 3.57363400  |
| H | -4.50919700 | 2.73538800  | 2.56379500  |
| H | -2.85238400 | -0.31489600 | 3.05178400  |
| H | -3.68297000 | 4.24903800  | 0.84923000  |
| H | -2.20346700 | 4.65491400  | -1.03119200 |
| H | -3.20606600 | 3.23541200  | -1.37676600 |
| H | 0.07964500  | 3.69366400  | 0.30551300  |
| H | 0.96130300  | 2.13713000  | -2.16978800 |
| H | 2.04748300  | 3.07210400  | -1.12242600 |
| H | 4.32847900  | -1.26263100 | 2.08002700  |
| H | 6.23941900  | -2.76933500 | 1.67338600  |
| H | 6.42252000  | -3.99247900 | -0.47552700 |
| K | -1.40473500 | 0.25261000  | 0.04828600  |

**K<sup>+</sup> / 2,3-DiPh-18c6\_c7**

|   |            |             |             |
|---|------------|-------------|-------------|
| C | 5.89879200 | 2.75929600  | 1.02541700  |
| C | 5.74899400 | 2.37391300  | -0.30243300 |
| C | 4.59220400 | 1.71575600  | -0.71080900 |
| C | 3.57797300 | 1.42835600  | 0.20068600  |
| C | 3.73452100 | 1.82286900  | 1.53151200  |
| C | 4.88625600 | 2.48458700  | 1.94163600  |
| H | 4.99449500 | 2.78666700  | 2.97657400  |
| H | 2.94666700 | 1.62389900  | 2.24871800  |
| C | 2.31713100 | 0.70467600  | -0.24589000 |
| H | 2.32696300 | 0.61458700  | -1.33906000 |
| C | 2.25432300 | -0.71261200 | 0.35417400  |

|                                         |             |             |             |   |             |             |             |
|-----------------------------------------|-------------|-------------|-------------|---|-------------|-------------|-------------|
| C                                       | 3.47304600  | -1.53031500 | -0.04513500 | H | -4.85943700 | -3.15316600 | 0.71985700  |
| C                                       | 4.44029500  | -1.87238700 | 0.89816100  | H | -2.71835800 | -1.93861000 | 0.84500200  |
| C                                       | 5.55967000  | -2.61429800 | 0.53119500  | C | -1.66891600 | -0.16635500 | -0.94974700 |
| C                                       | 5.71846300  | -3.02939200 | -0.78664700 | H | -1.48469000 | 0.33554900  | -1.90772200 |
| C                                       | 4.75198300  | -2.70080100 | -1.73424800 | C | -1.72388800 | 0.90668400  | 0.15416600  |
| C                                       | 3.63749800  | -1.95603900 | -1.36536800 | C | -2.84804300 | 1.89737700  | -0.10782100 |
| H                                       | 2.88475900  | -1.71494700 | -2.10689800 | C | -3.97821500 | 1.92297900  | 0.70726600  |
| H                                       | 4.86724000  | -3.02543200 | -2.76162100 | C | -5.01095000 | 2.82367600  | 0.46184400  |
| H                                       | 6.58733800  | -3.60905300 | -1.07427100 | C | -4.91903100 | 3.71557200  | -0.60129000 |
| H                                       | 6.30379800  | -2.87054400 | 1.27571200  | C | -3.78882100 | 3.70403400  | -1.41527700 |
| H                                       | 4.32163500  | -1.55418600 | 1.92781100  | C | -2.76101700 | 2.80066200  | -1.16975400 |
| H                                       | 2.22986100  | -0.61688800 | 1.44636100  | H | -1.88001400 | 2.80665400  | -1.80093300 |
| O                                       | 1.03471500  | -1.33884500 | -0.07701400 | H | -3.70887000 | 4.39963800  | -2.24228500 |
| C                                       | 0.81080800  | -2.60243200 | 0.56246700  | H | -5.72059900 | 4.41861200  | -0.79339600 |
| C                                       | -0.38277900 | -3.29312100 | -0.04661200 | H | -5.88413400 | 2.82965600  | -1.10312800 |
| H                                       | -0.41981600 | -4.32200700 | 0.33050600  | H | -4.05613400 | 1.23089500  | 1.53817000  |
| O                                       | -1.57802000 | -2.60672200 | 0.32466000  | H | -1.90872000 | 0.40110300  | 1.10956700  |
| C                                       | -2.77936300 | -3.21777200 | -0.15096500 | O | -0.44687800 | 1.56226900  | 0.22557400  |
| C                                       | -3.14209900 | -2.79773700 | -1.56074400 | C | -0.36520400 | -2.80066800 | 1.32381400  |
| H                                       | -2.34035000 | -3.04112700 | -2.26916800 | C | 0.93457600  | 3.24222000  | 1.27662100  |
| O                                       | -3.38498600 | -1.39405400 | -1.56260100 | H | 0.88784500  | 4.05437900  | 2.01185500  |
| C                                       | -3.73211500 | -0.88405800 | -2.84675000 | O | 2.01757200  | 2.36980800  | 1.59842000  |
| C                                       | -4.03423900 | 0.58872400  | -2.72739900 | C | 3.29235900  | 3.01310800  | 1.66005700  |
| H                                       | -4.83025500 | 0.75110300  | -1.99045500 | C | 3.95223400  | 3.16258900  | 0.30407900  |
| O                                       | -2.85431000 | 1.28188000  | -2.32893800 | H | 3.32703400  | 3.74434300  | -0.38465100 |
| C                                       | -3.06564300 | 2.68181500  | -2.16457100 | O | 4.18286500  | 1.86197600  | -0.22851300 |
| C                                       | -1.77198000 | 3.33287300  | -1.74459600 | C | 4.78598600  | 1.88033800  | -1.51893100 |
| H                                       | -0.98813900 | 3.10911100  | -2.47684800 | C | 5.05751500  | 0.46305400  | -1.95703400 |
| O                                       | -1.40906200 | 2.85293200  | -0.44951300 | H | 5.68588600  | -0.04625200 | -1.21603400 |
| C                                       | -0.20335100 | 3.41978100  | 0.06764100  | O | 3.82154800  | -0.23119900 | -2.10488900 |
| C                                       | 1.05577800  | 2.73123100  | -0.41593500 | C | 3.99745900  | -1.58810800 | -2.50405300 |
| H                                       | 1.91617800  | 3.32570500  | -0.09526400 | C | 2.64775000  | -2.64979800 | -2.62484900 |
| H                                       | 1.08075600  | 2.67087500  | -1.51080900 | H | 2.01877900  | -1.68602700 | -3.32262600 |
| O                                       | 1.12809600  | 1.41303100  | 0.14195500  | O | 2.04321500  | -2.31213800 | -1.33281200 |
| H                                       | -0.27037100 | 3.33705200  | 1.15390400  | C | 0.76505300  | -2.95073700 | -1.31327300 |
| H                                       | -0.14880300 | 4.48317000  | -0.18961100 | C | -0.38337900 | -2.03974300 | -1.69295300 |
| H                                       | -1.91268100 | 4.41963300  | -1.71145900 | H | -1.28556500 | -2.65043000 | -1.79272900 |
| H                                       | -3.39863600 | 3.12839700  | -3.10951800 | H | -0.20222100 | -1.55107200 | -2.65801900 |
| H                                       | -3.84015000 | 2.85764900  | -1.40800400 | O | -0.56633400 | -1.04599600 | -0.67684600 |
| H                                       | -4.38278900 | 0.96194600  | -3.69828900 | H | 0.62261600  | -3.31203900 | -0.29314300 |
| H                                       | -4.62157100 | -1.39782500 | -3.23133600 | H | 0.76814700  | -3.81743600 | -1.98326900 |
| H                                       | -2.90811900 | -1.04943200 | -3.55204800 | H | 2.78092500  | -3.26299700 | -3.02199000 |
| H                                       | -4.04336400 | -3.34014900 | -1.87397400 | H | 4.50474500  | -1.63412100 | -3.47559800 |
| H                                       | -2.69555300 | -4.30876300 | -0.10285800 | H | 4.61390600  | -2.11835900 | -1.76783900 |
| H                                       | -3.56836500 | -2.90460900 | 0.53481300  | H | 5.59781100  | 0.48166700  | -2.91148400 |
| H                                       | -0.27445100 | -3.33063000 | -1.13630300 | H | 5.73530800  | 2.42874100  | -1.48638000 |
| H                                       | 0.65347800  | -2.45038200 | 1.63721700  | H | 4.12377300  | 2.38187100  | -2.23570300 |
| H                                       | 1.68215400  | -3.24987000 | 0.43117900  | H | 4.90262000  | 3.69746200  | 0.42781000  |
| H                                       | 4.48108700  | 1.42028300  | -1.74810700 | H | 3.19894900  | 3.99649200  | 2.13341900  |
| H                                       | 6.52959800  | 2.58813000  | -1.02250200 | H | 3.91453600  | 2.38396400  | 2.29868500  |
| H                                       | 6.79668900  | 3.27426700  | 1.34519400  | H | 1.06997800  | 3.68600300  | 0.28416500  |
| K                                       | -1.39997400 | 0.10852400  | -0.17141500 | H | -0.44907100 | 1.93360300  | 2.27081700  |
|                                         |             |             |             | H | -1.18459700 | 3.20275300  | 1.27171100  |
|                                         |             |             |             | H | -3.53848000 | -0.09980400 | -2.93861900 |
|                                         |             |             |             | H | -5.67893100 | -1.31980300 | -3.06905900 |
|                                         |             |             |             | H | -6.35098900 | -2.84996100 | -1.23737000 |
|                                         |             |             |             | K | 1.97975500  | 0.06678600  | 0.07409200  |
| <b>K<sup>+</sup> / 2,3-DiPh-18c6_c8</b> |             |             |             |   |             |             |             |
| C                                       | -5.41228900 | -2.31208700 | -1.18081800 |   |             |             |             |
| C                                       | -5.03536400 | -1.45340400 | -2.20782500 |   |             |             |             |
| C                                       | -3.82672600 | -0.76648400 | -2.13370300 |   |             |             |             |
| C                                       | -2.98630800 | -0.92245900 | -1.03315400 |   |             |             |             |
| C                                       | -3.37017800 | -1.79056900 | -0.00819100 |   |             |             |             |
| C                                       | -4.57432200 | -2.48151700 | -0.08119500 |   |             |             |             |

### 3.3 Cartesian coordinates of CH<sub>3</sub>NH<sub>3</sub><sup>+</sup> / 2,3-DiPh18c6

|                                                                    |             |             |             |   |             |            |             |
|--------------------------------------------------------------------|-------------|-------------|-------------|---|-------------|------------|-------------|
| <b>CH<sub>3</sub>NH<sub>3</sub><sup>+</sup> / 2,3-DiPh-18c6_c1</b> |             |             |             | C | 2.41526400  | 0.74471700 | -0.42404300 |
| C                                                                  | -0.23989700 | -3.26480300 | -0.80426700 | H | 2.57289900  | 0.64056900 | -1.50447100 |
| H                                                                  | -0.29101900 | -4.32240800 | -0.51501900 | C | -0.05676600 | 3.50932300 | -0.57520800 |
| H                                                                  | 0.06396500  | -3.21287700 | -1.85684600 | H | 0.05747500  | 4.52569300 | -0.96851700 |
| C                                                                  | 0.79056000  | -2.58362100 | 0.06143000  | H | -0.19798800 | 3.57411100 | 0.51011700  |
| H                                                                  | 1.69400400  | -3.19722400 | 0.05852100  | C | 1.19279200  | 2.73044500 | -0.90132400 |
| H                                                                  | 0.43392700  | -2.50421100 | 1.09511100  | C | 2.05489900  | 3.33522300 | -0.60375300 |
| C                                                                  | 2.24176900  | -0.66884000 | 0.16436100  | H | 1.25392000  | 2.55566900 | -1.98249300 |
| H                                                                  | 2.05369000  | -0.57485100 | 1.24065100  | C | -3.49070900 | 3.00922500 | -1.85469000 |

|   |             |             |             |
|---|-------------|-------------|-------------|
| H | -3.16369400 | 2.90912400  | -2.89679300 |
| H | -4.37880300 | 3.65364800  | -1.83326300 |
| C | -2.39822400 | 3.65194700  | -1.03638500 |
| H | -2.68463500 | 3.69926800  | 0.02102100  |
| H | -2.23607800 | 4.67325500  | -1.39827500 |
| C | -4.90249200 | -0.38363500 | -1.52003900 |
| H | -5.69658100 | -0.89767000 | -2.07364100 |
| H | -5.20509000 | -0.31428900 | -0.46830600 |
| C | -4.71492100 | 0.99302700  | -2.10797600 |
| H | -5.68713700 | 1.50179300  | -2.13337500 |
| H | -4.34309400 | 0.91206100  | -3.13681800 |
| C | -3.81874200 | -2.48713700 | -1.23133800 |
| H | -4.09485900 | -2.54196400 | -0.17146200 |
| H | -4.60743300 | -2.97018300 | -1.81951600 |
| C | -2.51485800 | -3.20619200 | -1.47310600 |
| H | -2.21867900 | -3.10573700 | -2.52468700 |
| H | -2.65210000 | -4.27305900 | -1.25511300 |
| O | 1.08768100  | -1.27429700 | -0.45285500 |
| O | -1.51222000 | -2.65323300 | -0.62889600 |
| O | -3.68386200 | -1.12205800 | -1.63171500 |
| O | 1.20428000  | 1.48002800  | -0.20659200 |
| O | -1.19435200 | 2.89280500  | -1.18440900 |
| O | -3.79247900 | 1.72896600  | -1.31332200 |
| C | -1.83838900 | 0.26853600  | 1.19991200  |
| H | -1.92599600 | -0.74548000 | 1.58116800  |
| N | -1.46570100 | 0.21492500  | -0.23750000 |
| H | -0.55191300 | -0.24617300 | -0.36245100 |
| H | -2.17728900 | -0.30317400 | -0.77447000 |
| H | -1.39771200 | 1.16925100  | -0.62958100 |
| C | 3.49411400  | -1.50335400 | -0.05021600 |
| C | 4.29721100  | -1.86694800 | 1.02914200  |
| C | 3.85820500  | -1.91918600 | -1.33326400 |
| C | 5.45126800  | -2.62063100 | 0.83396600  |
| H | 4.02294300  | -1.55566300 | 2.03072100  |
| C | 5.00706400  | -2.67654500 | -1.53076800 |
| H | 3.23399700  | -1.66159600 | -2.18094100 |
| C | 5.80907300  | -3.02666400 | -0.44709700 |
| H | 6.06679400  | -2.89293100 | 1.68288400  |
| H | 5.27739300  | -2.99416300 | -2.53082400 |
| H | 6.70501700  | -3.61583800 | -0.60135300 |
| C | 3.61505300  | 1.45371800  | 0.18622800  |
| C | 4.76212600  | 1.69018200  | -0.56910000 |
| C | 3.57930000  | 1.88814200  | 1.51333600  |
| C | 5.86106000  | 2.33590000  | -0.00931400 |
| H | 4.80025900  | 1.36450400  | -1.60250700 |
| C | 4.67374400  | 2.53647000  | 2.07450200  |
| H | 2.68665200  | 1.73086100  | 2.10753300  |
| C | 5.81971200  | 2.75932500  | 1.31480900  |
| H | 6.74611500  | 2.51096100  | -0.60912500 |
| H | 4.63306300  | 2.86895800  | 3.10500700  |
| H | 6.67263000  | 3.26435500  | 1.75204600  |
| H | -1.06713400 | 0.80615700  | 1.74598000  |
| H | -2.78985600 | 0.78489500  | 1.29683700  |

**CH<sub>3</sub>NH<sub>3</sub><sup>+</sup> / 2,3-DiPh-18c6\_c2**

|   |             |             |             |
|---|-------------|-------------|-------------|
| C | -0.24753100 | -3.22969400 | -1.09370600 |
| H | -0.32552300 | -4.30054700 | -0.87274300 |
| H | -0.01318500 | -3.11198100 | -2.15780200 |
| C | 0.85522500  | -2.64323800 | -0.24912000 |
| H | 1.72667800  | -3.30007300 | -0.32394500 |
| H | 0.54717000  | -2.60916400 | 0.80396800  |
| C | 2.25130600  | -0.71796900 | 0.01750300  |
| H | 1.95893100  | -0.63187900 | 1.07191200  |
| C | 2.44709800  | 0.70132800  | -0.54662800 |
| H | 2.69371100  | 0.60637100  | -1.61005800 |
| C | 0.01842700  | 3.49569300  | -0.83057800 |
| H | 0.16556100  | 4.49337800  | -1.26390300 |
| H | -0.07301500 | 3.60873200  | 0.25735400  |
| C | 1.22168600  | 2.65318900  | -1.16877100 |
| H | 2.11894400  | 3.22208200  | -0.91115600 |
| H | 1.24331900  | 2.43571600  | -2.24265200 |
| C | -3.49723000 | 3.00887700  | -1.81420000 |
| H | -3.28539400 | 2.90268400  | -2.88438100 |
| H | -4.38602300 | 3.64012800  | -1.69675800 |
| C | -2.33064000 | 3.66481500  | -1.12029000 |

|   |             |             |             |
|---|-------------|-------------|-------------|
| H | -2.51731500 | 3.73670300  | -0.04086800 |
| H | -2.21520700 | 4.68247100  | -1.51422000 |
| C | -4.95635700 | -0.34716200 | -1.29227200 |
| H | -5.85181000 | -0.81698300 | -1.71862200 |
| H | -5.08849200 | -0.28770500 | -0.20384900 |
| C | -4.80921600 | 1.03289300  | -1.88189300 |
| H | -5.74426700 | 1.58736900  | -1.73800700 |
| H | -4.61151900 | 0.95917400  | -2.95748100 |
| C | -3.86532000 | -2.45350800 | -1.15247500 |
| H | -4.01077200 | -2.48140400 | -0.06461900 |
| H | -4.70842800 | -2.97560700 | -1.62264700 |
| C | -2.58679900 | -3.16001300 | -1.52733000 |
| H | -2.40305800 | -3.06173100 | -2.60316900 |
| H | -2.67931300 | -4.22494000 | -1.28512000 |
| O | 1.18082800  | -1.38086600 | -0.71201600 |
| O | -1.49469800 | -2.59704800 | -0.79588900 |
| O | -3.79840600 | -1.10904700 | -1.60763200 |
| O | 1.20397600  | 1.42011500  | -0.43174300 |
| O | -1.15624500 | 2.90155500  | -1.36808700 |
| O | -3.73522800 | 1.72294300  | -1.24065700 |
| C | -1.70316600 | 0.27008400  | 1.30472600  |
| H | -0.94697600 | -0.30288200 | 1.83552300  |
| N | -1.43980100 | 0.19406400  | -0.15678800 |
| H | -0.50253300 | 0.56657000  | -0.37820000 |
| H | -1.48128900 | -0.78582600 | -0.48542700 |
| H | -2.14296800 | 0.73741400  | -0.67966700 |
| C | 3.53829000  | -1.52397700 | -0.06884000 |
| C | 4.22593900  | -1.88779500 | 1.08734300  |
| C | 4.04572700  | -1.91927400 | -1.30889000 |
| C | 5.40767200  | -2.61982300 | 1.01092900  |
| H | 3.83806800  | -1.59495700 | 2.05666500  |
| C | 5.22308600  | -2.65413800 | -1.38852000 |
| H | 3.51146500  | -1.66256300 | -2.21626700 |
| C | 5.90969800  | -3.00340600 | -0.22797000 |
| H | 5.93221100  | -2.89277800 | 1.91874700  |
| H | 5.60588500  | -2.95504600 | -2.35651400 |
| H | 6.82791900  | -3.57495600 | -0.29034200 |
| C | 3.56905500  | 1.43911700  | 0.16557500  |
| C | 4.77207400  | 1.70439300  | -0.48630900 |
| C | 3.40747600  | 1.86805800  | 1.48509200  |
| C | 5.80254900  | 2.37318100  | 0.16861600  |
| H | 4.90781500  | 1.38353400  | -1.51296400 |
| C | 4.43315400  | 2.53949500  | 2.14074000  |
| H | 2.47074100  | 1.68734300  | 1.99909100  |
| C | 5.63570000  | 2.79110800  | 1.48454400  |
| H | 6.73233400  | 2.57065600  | -0.35119100 |
| H | 4.29481400  | 2.86729700  | 3.16424500  |
| H | 6.43518800  | 3.31397300  | 1.99553800  |
| H | -1.66532600 | 1.30904200  | 1.62184000  |
| H | -2.68745400 | -0.14216200 | 1.51148400  |

**CH<sub>3</sub>NH<sub>3</sub><sup>+</sup> / 2,3-DiPh-18c6\_c3**

|   |             |             |             |
|---|-------------|-------------|-------------|
| C | -2.03656800 | 1.12136400  | -3.67034900 |
| H | -2.02842600 | 1.89726400  | -4.44658800 |
| H | -1.53074700 | 0.23263400  | -4.06772900 |
| C | -3.46779200 | 0.79298300  | -3.32633700 |
| H | -3.99713600 | 0.50968400  | -4.24343500 |
| H | -3.96877900 | 1.66813200  | -2.89507200 |
| C | -4.82015000 | -0.75011500 | -2.12247000 |
| H | -5.39076500 | 0.03630100  | -1.61421200 |
| H | -5.32931000 | -0.99216700 | -3.06250000 |
| C | -4.75970800 | -1.99253500 | -1.26991300 |
| H | -4.12814500 | -2.74789400 | -1.75377400 |
| H | -5.77259700 | -2.40361800 | -1.17177000 |
| C | -3.40447000 | -2.34159300 | 2.13999500  |
| H | -3.34821100 | -3.18313000 | 2.83833200  |
| H | -3.99758400 | -1.55097100 | 2.60149200  |
| C | -4.06797500 | -2.79286000 | 0.85473400  |
| H | -5.04171500 | -3.23753200 | 1.09977400  |
| H | -3.47139500 | -3.55961900 | 0.34533400  |
| C | 0.28453000  | -2.06272900 | 1.75632000  |
| H | 1.05604300  | -2.84627300 | 1.82403800  |
| H | 0.37835000  | -1.40666900 | 2.63054000  |
| C | -1.05886700 | -2.74739900 | 1.76210700  |
| H | -1.08166500 | -3.46117100 | 2.59307000  |
| H | -1.20084200 | -3.29831200 | 0.82705200  |

|   |             |             |             |
|---|-------------|-------------|-------------|
| C | 1.78504100  | 0.25281900  | -0.72191600 |
| H | 1.55100000  | -0.28511600 | -1.64625700 |
| C | 1.77592100  | -0.76423000 | 0.43605900  |
| H | 2.02216900  | -0.22414000 | 1.35818800  |
| C | 0.63943500  | 2.29259400  | -1.41021200 |
| H | 0.03148300  | 3.05102500  | -0.91523900 |
| H | 1.62333900  | 2.72302200  | -1.60626400 |
| C | -0.00433600 | 1.90804000  | -2.72631500 |
| H | 0.51383600  | 1.06272900  | -3.19544000 |
| H | 0.07351200  | 2.76395000  | -3.41001600 |
| O | -3.49464000 | -0.29224200 | -2.39745500 |
| O | -1.36933400 | 1.58058700  | -2.50210300 |
| O | 0.74671900  | 1.21901400  | -0.45945000 |
| O | -4.23300100 | -1.66288100 | 0.00887000  |
| O | -2.09998100 | -1.78210100 | 1.94766200  |
| O | 0.45318200  | -1.30129100 | 0.55774500  |
| C | -2.70225600 | 1.59023900  | 0.66750900  |
| H | -2.63749700 | 2.40721400  | -0.04638700 |
| N | -2.01951900 | 0.39807900  | 0.10028400  |
| H | -2.46017300 | 0.12230800  | -0.79042700 |
| H | -1.02030500 | 0.58477200  | -0.08296000 |
| H | -2.07718200 | -0.40862700 | 0.74572300  |
| C | 2.80418500  | -1.86254900 | 0.21125200  |
| C | 3.95700600  | -1.93317500 | 0.99120100  |
| C | 2.60098900  | -2.82403800 | -0.78153300 |
| C | 4.89886300  | -2.93605700 | 0.77783400  |
| H | 4.12414200  | -1.19723900 | 1.76958100  |
| C | 3.53801200  | -3.82864900 | -0.99526200 |
| H | 1.69898600  | -2.79408200 | -1.38158500 |
| C | 4.69203100  | -3.88537900 | -0.21732200 |
| H | 5.79072200  | -2.97684300 | 1.39159900  |
| H | 3.36812700  | -4.56847400 | -1.76860900 |
| H | 5.42248100  | -4.66796900 | -0.38390700 |
| C | 3.14898500  | 0.90686400  | -0.85873000 |
| C | 3.94927300  | 0.64546600  | -1.96934100 |
| C | 3.62327300  | 1.77796300  | 0.12543900  |
| C | 5.20618600  | 1.23113200  | -2.09360300 |
| H | 3.59016300  | -0.02509600 | -2.74194500 |
| C | 4.87539200  | 2.36858900  | 0.00170200  |
| H | 3.00555500  | 2.00694400  | 0.98601800  |
| C | 5.67207900  | 2.09391300  | -1.10751500 |
| H | 5.81782100  | 1.01580200  | -2.96144400 |
| H | 5.23067500  | 3.04396300  | 0.77087200  |
| H | 6.64845300  | 2.55348400  | -1.20289900 |
| H | -3.74444400 | 1.34365900  | 0.85522000  |
| H | -2.21643000 | 1.87093000  | 1.59900200  |

**CH<sub>3</sub>NH<sub>3</sub><sup>+</sup> / 2,3-DiPh-18c6\_c4**

|   |             |             |             |
|---|-------------|-------------|-------------|
| C | -4.84568900 | 1.21003700  | 1.58295600  |
| H | -5.45022400 | 0.52296100  | 0.97911900  |
| H | -5.38691500 | 1.42116000  | 2.51263700  |
| C | -4.62642600 | 2.50664900  | 0.84433400  |
| H | -3.94672700 | 3.14390900  | 1.42077600  |
| H | -5.58732000 | 3.02711800  | 0.74718800  |
| C | -3.80151800 | 3.38179000  | -1.22800900 |
| H | -3.78607000 | 3.04642300  | -2.26655100 |
| H | -4.59672200 | 4.12916700  | -1.12299900 |
| C | -2.47289400 | 4.02499800  | -0.88425400 |
| H | -2.43253200 | 4.32504300  | 0.16901200  |
| H | -2.34846000 | 4.92652700  | -1.49637800 |
| C | 0.96505300  | 2.67878900  | -1.24711900 |
| H | 1.91608900  | 3.21982500  | -1.24137300 |
| H | 0.80600400  | 2.28026300  | -2.25706200 |
| C | -0.12312300 | 3.66050500  | -0.89368400 |
| H | 0.01344100  | 4.56309200  | -1.50040900 |
| H | -0.05047900 | 3.94076300  | 0.16344700  |
| C | 1.96917600  | -0.47187200 | 0.43754900  |
| H | 1.92815600  | -0.12337400 | 1.47492400  |
| C | 2.14393800  | 0.75957800  | -0.47183100 |
| H | 2.17163500  | 0.40860800  | -1.51102500 |
| C | -0.31388600 | -1.90810600 | 2.19753400  |
| H | 0.25891200  | -1.16685600 | 2.76905800  |
| H | -0.37540100 | -2.82208300 | 2.80319700  |
| C | 0.37150400  | -2.24341500 | 0.88991500  |
| H | -0.29996500 | -2.84005300 | 0.27067600  |
| H | 1.26314400  | -2.83985700 | 1.09083600  |

|   |             |             |             |
|---|-------------|-------------|-------------|
| C | -2.33147700 | -1.03208700 | 3.09516600  |
| H | -2.43560600 | -1.88549500 | 3.77739500  |
| H | -1.79139700 | -0.23503400 | 3.62136200  |
| C | -3.70648900 | -0.55509200 | 2.69990100  |
| H | -4.27673600 | -0.32149400 | 3.60644300  |
| H | -4.23980500 | -1.33882300 | 2.14871700  |
| O | -4.09411500 | 2.22632400  | -0.44696700 |
| O | -3.58368000 | 0.61394400  | 1.88889700  |
| O | -1.61982300 | -1.41490100 | 1.92554700  |
| O | -1.41366600 | 3.10594900  | -1.16297400 |
| O | 1.00107200  | 1.60748200  | -0.30059400 |
| O | 0.71425400  | -1.09312500 | 0.09647300  |
| C | -2.43101800 | -0.42891800 | -1.56573600 |
| H | -3.39770900 | 0.01824000  | -1.77926700 |
| N | -1.78378800 | 1.36573300  | -0.46928900 |
| H | -1.66742000 | 1.33283000  | -0.72677600 |
| H | -2.35989700 | 0.31655600  | 0.38544100  |
| H | -0.85270000 | -0.04472800 | -0.23935000 |
| C | 3.43902000  | 1.49514200  | -0.16169800 |
| C | 4.50859100  | 1.46291000  | -1.05466500 |
| C | 3.57184500  | 2.22070600  | 1.02458700  |
| C | 5.69552100  | 2.13083900  | -0.76614800 |
| H | 4.41706100  | 0.90883000  | -1.98203500 |
| C | 4.75463200  | 2.89160700  | 1.31421700  |
| H | 2.74160100  | 2.27276700  | 1.71916000  |
| C | 5.82168800  | 2.84568500  | 0.42017500  |
| H | 6.51837400  | 2.09516400  | -1.46998400 |
| H | 4.84444200  | 3.45133600  | 2.23771100  |
| H | 6.74343300  | 3.36833700  | 0.64586700  |
| C | 3.13120700  | -1.43837500 | 0.28097300  |
| C | 4.05700100  | -1.60547400 | 1.30938400  |
| C | 3.28967200  | -2.17365800 | -0.89630000 |
| C | 5.12992200  | -2.48069200 | 1.16450000  |
| H | 3.94308500  | -1.04453800 | 2.23013500  |
| C | 4.35728100  | -3.05182200 | -1.04222800 |
| H | 2.56747900  | -2.06989800 | -1.69762300 |
| C | 5.28274600  | -3.20534100 | -0.01251700 |
| H | 5.84211600  | -2.59817700 | 1.97235800  |
| H | 4.46788400  | -3.61760900 | -1.95966400 |
| H | 6.11499300  | -3.88941900 | -0.12675800 |
| H | -1.79818300 | -0.39051400 | -2.44912100 |
| H | -2.55954900 | -1.46143700 | -1.25051500 |

**CH<sub>3</sub>NH<sub>3</sub><sup>+</sup> / 2,3-DiPh-18c6\_c5**

|   |             |             |             |
|---|-------------|-------------|-------------|
| C | 5.62261900  | 2.49240400  | 0.41611300  |
| C | 5.27190200  | 2.34053300  | -0.92098700 |
| C | 4.03532400  | 1.79796300  | -1.25966600 |
| C | 3.14050400  | 1.39420200  | -0.27025000 |
| C | 3.49871700  | 1.55523200  | 1.07047100  |
| C | 4.73070800  | 2.10096900  | 1.41187500  |
| H | 4.99565300  | 2.22179100  | 2.45553700  |
| H | 2.80566500  | 1.26598800  | 1.85176100  |
| C | 1.79786200  | 0.78804300  | -0.64334300 |
| H | 1.63888600  | 0.89997500  | -1.72116300 |
| C | 1.75371100  | -0.71574200 | -0.31012500 |
| C | 2.85575500  | -1.47409600 | -1.03426400 |
| C | 3.94736900  | -1.98322000 | -0.33311700 |
| C | 4.96051600  | -2.66982100 | -0.99647300 |
| C | 4.88707500  | -2.86051000 | -2.37220400 |
| C | 3.79496800  | -2.36392000 | -3.07981900 |
| C | 2.78653700  | -1.67547500 | -2.41480100 |
| H | 1.93352200  | -1.30414300 | -2.97066900 |
| H | 3.72905400  | -2.51401100 | -4.15093300 |
| H | 5.67296700  | -3.39665700 | -2.89050200 |
| H | 5.80347800  | -3.05827100 | -0.43763500 |
| H | 4.01000600  | -1.83927300 | 0.73966800  |
| H | 1.89779700  | -0.82489100 | 0.77191900  |
| O | 0.45396600  | -1.21148900 | -0.65496700 |
| C | 0.23972400  | -2.55248300 | -0.20653700 |
| C | -1.05327200 | -3.09397200 | -0.76155600 |
| H | -1.07965100 | -4.17599500 | -0.58876400 |
| O | -2.17492000 | -2.48904800 | -0.11246900 |
| C | -3.42319100 | -3.01177600 | -0.57398900 |
| C | -4.55550700 | -2.35925700 | 0.19375200  |
| H | -4.39339000 | -2.49427300 | 1.26470100  |
| O | -4.64766800 | -0.95252200 | -0.01533000 |

|   |             |             |             |
|---|-------------|-------------|-------------|
| C | -5.32976700 | -0.57827400 | -1.20858600 |
| C | -5.29343400 | 0.92270000  | -1.35307700 |
| H | -5.67032900 | 1.40440100  | -0.44305100 |
| O | -3.95425700 | 1.34746900  | -1.61413500 |
| C | -3.86477100 | 2.74199500  | -1.90974200 |
| C | -2.44392500 | 3.08084300  | -2.28519900 |
| H | -2.12119000 | 2.46953000  | -3.13722500 |
| O | -1.59989500 | 2.84423000  | -1.16611600 |
| C | -0.23719100 | 3.16987300  | -1.41012600 |
| C | 0.57939000  | 2.83601700  | -0.17981300 |
| H | 0.08715000  | 3.24381400  | 0.70442000  |
| H | 1.56405400  | 3.29986300  | -0.26106700 |
| O | 0.71596600  | 1.42461300  | 0.06435700  |
| H | -0.13801000 | 4.24421700  | -1.61495900 |
| H | 0.12980200  | 2.62676400  | -2.29012900 |
| H | -2.39916200 | 4.13632100  | -2.58260900 |
| H | -4.52376500 | 2.98680100  | -2.75083700 |
| H | -4.18079600 | 3.33006500  | -1.03983300 |
| H | -5.94028000 | 1.21135500  | -2.18970500 |
| H | -6.37608700 | -0.90456100 | -1.15878900 |
| H | -4.86723900 | -1.04072300 | -2.08735200 |
| H | -5.49792500 | -2.85172600 | -0.07291000 |
| H | -3.51769700 | -2.84144500 | -1.65261700 |
| H | -3.45550000 | -4.09400100 | -0.39912400 |
| H | -1.10537200 | -2.91518100 | -1.84163300 |
| H | 0.22569200  | -2.58338500 | 0.89036400  |
| H | 1.04984500  | -3.20063600 | -0.55395300 |
| H | 3.76780900  | 1.68382100  | -2.30412700 |
| H | 5.95749300  | 2.64747600  | -1.70162200 |
| H | 6.58292900  | 2.91728400  | 0.68246900  |
| C | -2.38389300 | 0.69647300  | 1.76877300  |
| H | -2.30549300 | 1.77361700  | 1.89356800  |
| H | -3.40909500 | 0.37602400  | 1.93161500  |
| N | -1.98787900 | 0.33672500  | 0.38170700  |
| H | -2.59939500 | 0.79968900  | -0.30730700 |
| H | -1.01267900 | 0.61396900  | 0.18476300  |
| H | -2.07177800 | -0.68066200 | 0.21955300  |
| H | -1.72021300 | 0.19638200  | 2.46997900  |

#### CH<sub>3</sub>NH<sub>3</sub><sup>+</sup> / 2,3-DiPh-18c6\_c6

|   |             |             |             |
|---|-------------|-------------|-------------|
| C | 5.33147900  | 2.78324700  | -0.50761600 |
| C | 4.99529200  | 2.22894700  | -1.73803100 |
| C | 3.79813400  | 1.53397700  | -1.88546100 |
| C | 2.92859100  | 1.37806300  | -0.80754700 |
| C | 3.27097100  | 1.94311000  | 0.42313100  |
| C | 4.46385000  | 2.64132800  | 0.57268300  |
| H | 4.71726400  | 3.07540300  | 1.53262100  |
| H | 2.59664200  | 1.84790100  | 1.26606300  |
| C | 1.62604500  | 0.61002700  | -0.96743900 |
| H | 1.46379100  | 0.39348700  | -2.02974400 |
| C | 1.67144000  | -0.73169800 | -0.21291100 |
| C | 2.84369800  | -1.57988000 | -0.68417900 |
| C | 3.93493400  | -1.81134300 | 0.15104300  |
| C | 5.01077700  | -2.58130600 | -0.28238400 |
| C | 5.00117500  | -3.13577500 | -1.55779300 |
| C | 3.90993400  | -2.91866800 | -2.39571700 |
| C | 2.83916300  | -2.14562200 | -1.96136900 |
| H | 1.98821600  | -1.99275500 | -2.61496400 |
| H | 3.89355700  | -3.35255500 | -3.38849100 |
| H | 5.83607300  | -3.73737400 | -1.89648100 |
| H | 5.85299900  | -2.75006300 | 0.37788900  |
| H | 3.94876600  | -1.38368900 | 1.14728100  |
| H | 1.79330100  | -0.52030700 | 0.85700300  |
| O | 0.41680400  | -1.39668200 | -0.41140600 |
| C | 0.31627900  | -2.62419600 | 0.31616600  |
| C | -0.99400400 | -3.30658600 | 0.01378200  |
| H | -0.94757600 | -4.33389100 | 0.39120000  |
| O | -2.06430700 | -2.61877200 | 0.67006400  |
| C | -3.34241100 | -3.25704200 | 0.55672500  |
| C | -4.08893900 | -2.87690500 | -0.70423600 |
| H | -3.49502300 | -3.10092800 | -1.59921700 |
| O | -4.38357100 | -1.48737200 | -0.64833200 |
| C | -5.02573300 | -1.00183300 | -1.81978800 |
| C | -5.26367000 | 0.48065900  | -1.67935900 |
| H | -5.83453400 | 0.69235300  | -0.76743400 |
| O | -4.00927300 | 1.16422500  | -1.64121300 |

|   |             |             |             |
|---|-------------|-------------|-------------|
| C | -4.15245500 | 2.58604600  | -1.65630300 |
| C | -2.79003300 | 3.22287200  | -1.76722000 |
| H | -2.27009800 | 2.82537500  | -2.64595300 |
| O | -2.05518200 | 2.95746600  | -0.57640100 |
| C | -0.72316300 | 3.46563200  | -0.58499000 |
| C | 0.28450900  | 2.56330100  | -1.26716600 |
| H | 1.22063200  | 3.11962400  | -1.36624900 |
| H | -0.04677000 | 2.27809200  | -2.27247600 |
| O | 0.50692600  | 1.37881900  | -0.48427100 |
| H | -0.44008700 | 3.59895000  | 0.46086900  |
| H | -0.69754900 | 4.44802900  | -1.07034900 |
| H | -2.91193600 | 4.30521300  | -1.89925000 |
| H | -4.75667600 | 2.88760500  | -2.51974600 |
| H | -4.65953700 | 2.92250300  | -0.74428200 |
| H | -5.84633000 | 0.82803900  | -2.54027800 |
| H | -5.99210400 | -1.50246500 | -1.96138600 |
| H | -4.40378300 | -1.20108100 | -2.70155200 |
| H | -5.01519300 | -3.46421300 | -0.75985500 |
| H | -3.22029500 | -4.32649000 | 0.60225900  |
| H | -3.91451900 | -2.93845000 | 1.42941100  |
| H | -1.15800300 | -3.34127200 | -1.06830600 |
| H | 0.39955100  | -2.43124000 | 1.39319000  |
| H | 1.12563100  | -3.30137400 | 0.02858000  |
| H | 3.54078000  | 1.10690900  | -2.84819600 |
| H | 5.66137300  | 2.34011500  | -2.58519200 |
| H | 6.26132400  | 3.32677000  | -0.39084100 |
| C | -2.41405700 | 0.73727200  | 1.76061200  |
| H | -2.42987500 | 1.82265000  | 1.72704000  |
| H | -3.39190500 | 0.35932000  | 2.04929000  |
| N | -2.07767100 | 0.21810600  | 0.40835500  |
| H | -2.76232800 | 0.54334500  | -0.29171600 |
| H | -1.14489500 | 0.53464700  | 0.10117300  |
| H | -2.08340100 | -0.81658600 | 0.40828900  |
| H | -1.66546000 | 0.39322800  | 2.47019800  |

#### CH<sub>3</sub>NH<sub>3</sub><sup>+</sup> / 2,3-DiPh-18c6\_c7

|   |             |             |             |
|---|-------------|-------------|-------------|
| C | 5.84319900  | 2.77435100  | 1.17816600  |
| C | 5.80538600  | 2.34937500  | -0.14554300 |
| C | 4.68675900  | 1.67709600  | -0.62992800 |
| C | 3.459908400 | 1.41531600  | 0.20119800  |
| C | 3.64269300  | 1.85072300  | 1.52774600  |
| C | 4.75664200  | 2.52597500  | 2.01348800  |
| H | 4.77766800  | 2.85907400  | 3.04435600  |
| H | 2.79660900  | 1.67266800  | 2.18117800  |
| C | 2.38110600  | 0.67233000  | -0.32488000 |
| H | 2.46459900  | 0.56738400  | -1.41260700 |
| C | 2.28567200  | -0.74026900 | 0.28049900  |
| C | 3.54305000  | -1.54300700 | -0.02034500 |
| C | 4.43404000  | -1.87615300 | 0.99802100  |
| C | 5.58695100  | -2.60641600 | 0.72301500  |
| C | 5.85619300  | -3.01887700 | -0.57757000 |
| C | 4.96646600  | -2.69896100 | -1.60036300 |
| C | 3.81838400  | -1.96557000 | -1.32313100 |
| H | 3.12533500  | -1.73231100 | -2.12320600 |
| H | 5.16750400  | -3.02200000 | -2.61495100 |
| H | 6.75106800  | -3.59000400 | -0.79367900 |
| H | 6.27092400  | -2.85558000 | 1.52541600  |
| H | 4.22944400  | -1.56010900 | 2.01475000  |
| H | 2.17923600  | -0.64234000 | 1.36832900  |
| O | 1.10967400  | -1.37201900 | -0.24278100 |
| C | 0.88069300  | -2.66913600 | 0.31518500  |
| C | -0.33648300 | -3.30206800 | -0.31062800 |
| H | -0.35128700 | -4.36497000 | -0.04598000 |
| O | -1.52363000 | -2.68160300 | 0.19509100  |
| C | -2.74547500 | -3.29990800 | -0.22734900 |
| C | -3.23845700 | -2.79637700 | -1.56737300 |
| H | -2.48238500 | -2.94131700 | -2.34933300 |
| O | -3.55128100 | -1.41574300 | -1.44027000 |
| C | -3.96509400 | -0.81902400 | -2.66216200 |
| C | -4.23856400 | 0.64595300  | -2.43227500 |
| H | -4.97640500 | 0.77753300  | -1.63193400 |
| O | -3.02084400 | 1.31009400  | -2.08901500 |
| C | -3.16624500 | 2.72964500  | -2.01681200 |
| C | -1.81364400 | 3.35865600  | -1.79711300 |
| H | -1.12269600 | 3.02473500  | -2.57913800 |
| O | -1.33629700 | 2.99471500  | -0.50538100 |

|   |             |             |             |   |             |             |             |
|---|-------------|-------------|-------------|---|-------------|-------------|-------------|
| C | -0.03504700 | 3.49188400  | -0.20194800 | O | -0.59838500 | 0.66234100  | 1.04566100  |
| C | 1.09833100  | 2.64163700  | -0.73810800 | H | 0.83944100  | 2.84905400  | 1.40016100  |
| H | 2.03029000  | 3.19613200  | -0.59744500 | H | 1.01956500  | 2.69611500  | 3.16005000  |
| H | 0.98148700  | 2.44475800  | -1.81012200 | H | 3.28347600  | 2.81340200  | 1.25349900  |
| O | 1.16829000  | 1.39255000  | -0.03039000 | H | 4.42473000  | 0.32486800  | 2.61065200  |
| H | 0.02902500  | 3.53709200  | 0.88675200  | H | 5.39225800  | 1.66614400  | 1.95478000  |
| H | 0.07904700  | 4.51083700  | -0.58962800 | H | 6.38413600  | 0.04508500  | 0.61738100  |
| H | -1.91191100 | 4.44910400  | -1.86695800 | H | 6.13044400  | -2.34290700 | 0.51902800  |
| H | -3.58438900 | 3.10585800  | -2.95759900 | H | 4.99912700  | -1.77457900 | 1.76007200  |
| H | -3.84999100 | 2.99719800  | -1.20247100 | H | 4.50956200  | -4.28212000 | 0.52246900  |
| H | -4.64719500 | 1.07830100  | -3.35286600 | H | 2.24586600  | -5.05866900 | 0.06912500  |
| H | -4.88252800 | -1.29623000 | -3.03004900 | H | 2.94801600  | -4.31966000 | -1.38765100 |
| H | -3.18541600 | -0.94089300 | -3.42453700 | H | -0.10188900 | -4.40469900 | 0.03394700  |
| H | -4.13134900 | -3.36779800 | -1.85387900 | H | -0.42488800 | -2.12615100 | -1.99221200 |
| H | -2.61873900 | -4.11843100 | -0.26407600 | H | -1.69427300 | -3.21373300 | -1.40959900 |
| H | -3.48125000 | -3.06583600 | 0.54363300  | H | -4.10375500 | 0.26969400  | 2.63258200  |
| H | -0.28528700 | -3.21625500 | -1.40091300 | H | -5.87951800 | 1.98204000  | 2.57675200  |
| H | 0.74685000  | -2.59340800 | 1.40148600  | H | -5.78293100 | 3.81873700  | 0.91404200  |
| H | 1.73831300  | -3.32013600 | 0.12290100  | C | 1.80531500  | 0.25491900  | -1.79880200 |
| H | 4.66296100  | 1.35045000  | -1.66346100 | H | 2.70140700  | -0.09038600 | -2.31109800 |
| H | 6.64384300  | 2.54370200  | -0.80354600 | H | 0.92507800  | -0.06635400 | -2.35190300 |
| C | 6.71152300  | 3.30001500  | 1.55679400  | N | 1.77714300  | -0.33810200 | -0.43375000 |
| C | -2.11040500 | 0.58240700  | 1.51893600  | H | 2.62448000  | -0.05482100 | 0.08427400  |
| H | -1.50634700 | 0.17403300  | 2.32527800  | H | 0.94985300  | -0.02947400 | 0.10116600  |
| H | -2.12415500 | 1.66693000  | 1.57120500  | H | 1.75856800  | -1.37210000 | -0.46478000 |
| N | -1.52452300 | 0.17179600  | 0.21521400  | H | 1.81806000  | 1.33456700  | -1.71985700 |
| H | -2.06489000 | 0.56378000  | -0.57173600 |   |             |             |             |
| H | -0.55113200 | 0.50062500  | 0.11914700  |   |             |             |             |
| H | -1.52649400 | -0.85896700 | 0.12405000  |   |             |             |             |
| H | -3.12339600 | 0.19339600  | 1.58848500  |   |             |             |             |

**CH<sub>3</sub>NH<sub>3</sub><sup>+</sup> / 2,3-DiPh-18c6\_c8**

|   |             |             |             |
|---|-------------|-------------|-------------|
| C | -5.00496800 | 3.06517900  | 0.93875700  |
| C | -5.05955600 | 2.03421800  | 1.87060300  |
| C | -4.05646900 | 1.06942700  | 1.90202100  |
| C | -2.99381600 | 1.11847500  | 1.00127000  |
| C | -2.94337000 | 2.16088200  | 0.07304400  |
| C | -3.94179700 | 3.12780600  | 0.04104300  |
| H | -3.89123700 | 3.93134400  | -0.68415400 |
| H | -2.11349400 | 2.22331000  | -0.62081800 |
| C | -1.90655300 | 0.05823900  | 1.02900000  |
| H | -2.01800800 | -0.55062900 | 1.93324800  |
| C | -1.98397600 | -0.89373100 | -0.17853600 |
| C | -3.35439900 | -1.53936300 | -0.30544200 |
| C | -4.21867700 | -1.17787200 | -1.33726800 |
| C | -5.47562800 | -1.76574600 | -1.44989500 |
| C | -5.87778700 | -2.73004100 | -0.53188100 |
| C | -5.01653700 | -3.10475800 | 0.49663200  |
| C | -3.76344500 | -2.51310000 | 0.60871400  |
| H | -3.09364700 | -2.81902500 | 1.40380600  |
| H | -5.32174500 | -3.85939100 | 1.21182800  |
| H | -6.85423800 | -3.19118600 | -0.61886300 |
| H | -6.13715800 | -1.47321900 | -2.25647600 |
| H | -3.91083700 | -0.42826000 | -2.05775000 |
| H | -1.78084800 | -0.31161900 | -1.08746500 |
| O | -0.95164900 | -1.86843900 | -0.00141000 |
| C | -0.75953900 | -2.71687300 | -1.12923400 |
| C | 0.25402000  | -3.78423500 | -0.79577700 |
| H | 0.38228200  | -4.42208800 | -1.67791300 |
| O | 1.50011700  | -3.18719800 | -0.43445800 |
| C | 2.58476500  | -4.11605600 | -0.37405700 |
| C | 3.68657100  | -3.55637100 | 0.49245900  |
| H | 3.32201600  | -3.40856800 | 1.51698700  |
| O | 4.13183800  | -2.31728400 | -0.04346900 |
| C | 5.21748200  | -1.75600600 | 0.68531900  |
| C | 5.44482400  | -0.33770500 | 0.20568500  |
| H | 5.51825700  | -0.32723600 | -0.88291000 |
| O | 4.37075200  | 0.55070200  | 0.53750800  |
| C | 4.45253200  | 1.11241700  | 1.85047500  |
| C | 3.29486800  | 2.05795800  | 2.04937400  |
| H | 3.41716100  | 2.57362500  | 3.01015800  |
| O | 2.08200200  | 1.31384400  | 2.04018700  |
| C | 0.93136600  | 2.12973700  | 2.22396200  |
| C | -0.30507300 | 1.27213600  | 2.31163400  |
| H | -1.13923700 | 1.91178000  | 2.61400100  |
| H | -0.17311700 | 0.49100700  | 3.06885300  |

**CH<sub>3</sub>NH<sub>3</sub><sup>+</sup> / 2,3-DiPh-18c6\_c9**

|   |             |             |             |
|---|-------------|-------------|-------------|
| C | 5.62673600  | -3.32214100 | -0.26149500 |
| C | 5.51951100  | -2.60856200 | 0.92741700  |
| C | 4.43107900  | -1.76679900 | 1.13943900  |
| C | 3.44336700  | -1.62259200 | 0.16691500  |
| C | 3.55573000  | -2.34757000 | -1.02178800 |
| C | 4.63944500  | -3.19179000 | -1.23531900 |
| H | 4.71420400  | -3.74898000 | -2.16166200 |
| H | 2.78562200  | -2.26216800 | -1.77958400 |
| C | 2.25412900  | -0.70156400 | 0.39686700  |
| H | 2.26986100  | -0.35091400 | 1.43621000  |
| C | 2.32387900  | 0.53239500  | -0.52262700 |
| C | 3.61615600  | 1.30146000  | -0.29887900 |
| C | 4.60287000  | 1.32866000  | -1.28254000 |
| C | 5.79227500  | 2.02219800  | -1.07711300 |
| C | 6.00268500  | 2.70502400  | 0.11602100  |
| C | 5.01788200  | 2.69194600  | 1.10096600  |
| C | 3.83336500  | 1.99398500  | 0.89490900  |
| H | 3.06778700  | 1.99980500  | 1.66201100  |
| H | 5.17334800  | 3.22636400  | 2.03064700  |
| H | 6.92616200  | 3.24807000  | 0.27710300  |
| H | 6.55078600  | 2.03159200  | -1.85056900 |
| H | 4.44390900  | 0.80080600  | -2.21608800 |
| H | 2.28775300  | 0.18874000  | -1.56310300 |
| O | 1.16576200  | 1.35450000  | -0.12729600 |
| C | 1.10685000  | 2.50698900  | -1.13108800 |
| C | 0.02239500  | 3.45299500  | -0.67806500 |
| H | 0.17061800  | 4.41585000  | -1.18264800 |
| O | -1.25483200 | 2.92647500  | -1.02489100 |
| C | -2.35612600 | 3.75828500  | -0.66880200 |
| C | -2.79235200 | 3.59587800  | 0.77292000  |
| H | -1.97690400 | 3.82743700  | 1.46843700  |
| O | -3.23384400 | 2.25313800  | 0.97875800  |
| C | -3.71370200 | 2.03469300  | 2.30684400  |
| C | -4.16962400 | 0.60579500  | 2.46152900  |
| H | -4.90613300 | 0.35452900  | 1.68761200  |
| O | -3.04402700 | -0.25829500 | 2.36828500  |
| C | -3.37454600 | -1.62965200 | 2.54794900  |
| C | -2.12503400 | -2.45807400 | 2.38448700  |
| H | -1.34707700 | -2.09625700 | 3.06439300  |
| O | -1.68539000 | -2.37462600 | 1.02475300  |
| C | -0.51619300 | -3.14919600 | 0.73116100  |
| C | 0.78781800  | -2.45729000 | 1.06727200  |
| H | 1.59322300  | -3.19399100 | 0.98314200  |
| H | 0.78477700  | -2.08273900 | 2.09826900  |
| O | 1.01096000  | -1.37432300 | 0.15993700  |
| H | -0.55392500 | -3.35858000 | -0.33907500 |
| H | -0.56529000 | -4.10217000 | 1.26768600  |
| H | -2.34731800 | -3.50193500 | 2.63114900  |



|   |             |             |             |   |             |             |             |
|---|-------------|-------------|-------------|---|-------------|-------------|-------------|
| H | -3.78324100 | -1.79616900 | 3.55270600  | H | 4.18807000  | 2.28642300  | -2.25731900 |
| H | -4.13029500 | -1.93805000 | 1.81470100  | H | 4.82355100  | 3.80724400  | 0.22289600  |
| H | -4.65307700 | 0.49741500  | 3.44085200  | H | 3.14771000  | 4.23660700  | 1.91700700  |
| H | -4.56038300 | 2.70198800  | 2.50588800  | H | 3.93269400  | 2.68440000  | 2.25283300  |
| H | -2.92020200 | 2.25712300  | 3.02995400  | H | 0.99639300  | 3.66541100  | 0.20628100  |
| H | -3.61508900 | 4.29313700  | 0.97387900  | H | -0.38303600 | 1.93360500  | 2.30546200  |
| H | -2.11912900 | 4.81192400  | -0.85649500 | H | -1.21707300 | 3.13573600  | 1.30214900  |
| H | -3.17575500 | 3.47074000  | -1.32988500 | H | -3.54911100 | -0.01925900 | -2.92275000 |
| H | 0.10416200  | 3.61653900  | 0.40223700  | H | -5.70262200 | -1.21072900 | -3.09991500 |
| H | 0.92821000  | 2.19000800  | -2.16518600 | H | -6.39122800 | -2.80302500 | -1.32830600 |
| H | 2.05899700  | 3.04072500  | -1.09526700 | C | 2.28156500  | -0.69703000 | 1.74030700  |
| H | 4.35310300  | -1.21477100 | 2.06932600  | H | 3.26004900  | -1.17061500 | 1.76759300  |
| H | 6.28024700  | -2.70851200 | 1.69230400  | H | 2.22948000  | 0.09664600  | 2.47953300  |
| C | 6.47162900  | -3.97952100 | -0.42795000 | N | 2.06513400  | -0.11111700 | 0.39094600  |
| C | -2.02888100 | -0.12853000 | -1.67565900 | H | 1.14126000  | 0.34606300  | 0.32428500  |
| H | -1.93629500 | 0.78027800  | -2.26274200 | H | 2.77904400  | 0.60026100  | 0.17289200  |
| H | -1.41649200 | -0.91789300 | -2.10468300 | H | 2.10626400  | -0.84772400 | -0.33406300 |
| N | -1.56162800 | 0.14646000  | -0.29094500 | H | 1.51069600  | -1.43995000 | 1.93053700  |
| H | -0.57605400 | 0.45168100  | -0.28391900 |   |             |             |             |
| H | -2.12141800 | 0.88987800  | 0.15275600  |   |             |             |             |
| H | -1.63049600 | -0.70600400 | 0.29105100  |   |             |             |             |
| H | -3.06741900 | -0.44907600 | -1.64215600 |   |             |             |             |

**CH<sub>3</sub>NH<sub>3</sub><sup>+</sup> / 2,3-DiPh-18c6\_c10**

|   |             |             |             |
|---|-------------|-------------|-------------|
| C | -5.44668000 | -2.27802400 | -1.25148900 |
| C | -5.06054400 | -1.38428600 | -2.24469500 |
| C | -3.84473400 | -0.71362200 | -2.14435200 |
| C | -3.00588900 | -0.92120700 | -1.05106800 |
| C | -3.39841200 | -1.82505200 | -0.06107000 |
| C | -4.61025900 | -2.49932900 | -0.15994500 |
| H | -4.90253700 | -3.19863500 | 0.61444200  |
| H | -2.74735700 | -2.01329600 | 0.78470700  |
| C | -1.67960600 | -0.18370500 | -0.93838500 |
| H | -1.48312800 | 0.34212800  | -1.88103600 |
| C | -1.72528400 | 0.86346100  | 0.19058900  |
| C | -2.84224500 | 1.86711900  | -0.04746000 |
| C | -3.96315400 | 1.88985600  | 0.78035700  |
| C | -4.99185200 | 2.80121900  | 0.55855800  |
| C | -4.90461100 | 3.70704800  | -0.49306800 |
| C | -3.78362700 | 3.69809300  | -1.31981400 |
| C | -2.76020700 | 2.78366300  | -1.09851700 |
| H | -1.88620800 | 2.79206600  | -1.73933500 |
| H | -3.70737200 | 4.40459600  | -2.13785100 |
| H | -5.70259200 | 4.41898700  | -0.66636400 |
| H | -5.85779500 | 2.80488500  | 1.20958300  |
| H | -4.03651200 | 1.18763900  | 1.60313700  |
| H | -1.90868000 | 0.34115800  | 1.13691000  |
| O | -0.43875200 | 1.50982900  | 0.26830700  |
| C | -0.35985400 | 2.46043300  | 1.34435400  |
| C | 0.89492000  | 3.29007000  | 1.23060500  |
| H | 0.80175100  | 4.15125400  | 1.90372200  |
| O | 2.02565200  | 2.51115900  | 1.60947200  |
| C | 3.26864300  | 3.20665900  | 1.56164000  |
| C | 3.89382700  | 3.22639900  | 0.18159600  |
| H | 3.23220900  | 3.70077300  | -0.55294600 |
| O | 4.17752500  | 1.88551300  | -0.22105000 |
| C | 4.82350700  | 1.82202700  | -1.49402900 |
| C | 5.10363800  | 0.38578700  | -1.85772300 |
| H | 5.66761500  | -0.10746300 | -1.05584700 |
| O | 3.87274100  | -0.29070300 | -2.08053600 |
| C | 4.04354300  | -1.64864100 | -2.46680100 |
| C | 2.68565300  | -2.28258900 | -2.63619700 |
| H | 2.08504300  | -1.69494200 | -3.33804100 |
| O | 2.04320600  | -2.35431400 | -1.35908800 |
| C | 0.74456700  | -2.95927100 | -1.38211300 |
| C | -0.37628000 | -2.00899200 | -1.74716600 |
| H | -1.27937400 | -2.60196300 | -1.92425200 |
| H | -0.14849800 | -1.46332300 | -2.67110300 |
| O | -0.59399600 | -1.08240400 | -0.67942800 |
| H | 0.57753400  | -3.35450800 | -0.37888300 |
| H | 0.74563200  | -3.79923000 | -2.08402200 |
| H | 2.80564100  | -3.29378100 | -3.04008900 |
| H | 4.58623600  | -1.71036000 | -3.41862800 |
| H | 4.62090900  | -2.19009300 | -1.70676500 |
| H | 5.71775900  | 0.36876500  | -2.76715300 |
| H | 5.77186900  | 2.37029900  | -1.45257200 |

**CH<sub>3</sub>NH<sub>3</sub><sup>+</sup> / 2,3-DiPh-18c6\_c11**

|   |             |             |             |
|---|-------------|-------------|-------------|
| C | -5.42626000 | -2.32031900 | -1.24821200 |
| C | -5.05555600 | -1.41301700 | -2.23497600 |
| C | -3.84643000 | -0.73029800 | -2.13520500 |
| C | -2.99899800 | -0.93924100 | -1.04882100 |
| C | -3.37603500 | -1.85663900 | -0.06528900 |
| C | -4.58115300 | -2.54295800 | -0.16365200 |
| H | -4.86141700 | -3.25267000 | 0.60569500  |
| H | -2.71815700 | -2.04752000 | 0.77500000  |
| C | -1.67996000 | -0.18874700 | -0.93671400 |
| H | -1.49411000 | 0.34747300  | -1.87564000 |
| C | -1.72996700 | 0.84777200  | 0.20182000  |
| C | -2.85903100 | 1.84143400  | -0.02025300 |
| C | -3.97387700 | 1.84587300  | 0.81601000  |
| C | -5.01368700 | 2.74808700  | 0.60912300  |
| C | -4.94377700 | 3.66308600  | -0.43583200 |
| C | -3.82894000 | 3.67251400  | -1.27085300 |
| C | -2.79440500 | 2.76714000  | -1.06449700 |
| H | -1.92527300 | 2.78997400  | -1.71156900 |
| H | -3.76618800 | 4.38636500  | -2.08363600 |
| H | -5.75043400 | 4.36794600  | -0.59748400 |
| H | -5.87469600 | 2.73751400  | 1.26658000  |
| H | -4.03362900 | 1.13664600  | 1.63386500  |
| H | -1.90198400 | 0.31504300  | 1.14448100  |
| O | -0.44961900 | 1.50674800  | 0.27740200  |
| C | -0.37507200 | 2.45208500  | 1.35840800  |
| C | 0.87407800  | 3.29050700  | 1.24717400  |
| H | 0.77587200  | 4.14786800  | 1.92445500  |
| O | 2.01036400  | 2.51737600  | 2.51214900  |
| C | 3.24810400  | 3.22252700  | 1.57926700  |
| C | 3.87374500  | 3.25722000  | 0.19976300  |
| H | 3.20901500  | 3.73212000  | -0.53164500 |
| O | 4.16743800  | 1.92147600  | -0.12159400 |
| C | 4.81500300  | 1.87219800  | -1.48535300 |
| C | 5.10458300  | 0.44073900  | -1.86022900 |
| H | 5.67164600  | -0.05519800 | -1.06218400 |
| O | 3.87821600  | -0.24204800 | -2.08864700 |
| C | 4.05834400  | -1.59566400 | -2.48555400 |
| C | 2.70500900  | -2.23737500 | -2.66161800 |
| H | 2.10106800  | -1.64817700 | -3.35931500 |
| O | 2.06153300  | -2.32419500 | -1.38594900 |
| C | 0.76703100  | -2.93778000 | -1.41622600 |
| C | -0.36011900 | -1.99079700 | -1.77019200 |
| H | -1.25929800 | -2.58764300 | -1.95404200 |
| H | -0.13614600 | -1.43266500 | -2.68761200 |
| O | -0.58376600 | -1.07836500 | -0.69157400 |
| H | 0.60243000  | -3.34584100 | -0.41774500 |
| H | 0.77381900  | -3.76941700 | -2.12793800 |
| H | 2.83251600  | -3.24432700 | -3.07369900 |
| H | 4.60240200  | -1.64615200 | -3.43725500 |
| H | 4.63856700  | -2.13931500 | -1.72928000 |
| H | 5.71899200  | 0.43493500  | -2.76964200 |
| H | 5.75986300  | 2.42608700  | -1.43864000 |
| H | 4.17736600  | 2.33862400  | -2.24555600 |
| H | 4.79912600  | 3.84462200  | 0.24587300  |
| H | 3.11922300  | 4.24881300  | 1.94232300  |
| H | 3.91573800  | 2.70001600  | 2.26682900  |

|   |             |             |             |   |            |             |             |
|---|-------------|-------------|-------------|---|------------|-------------|-------------|
| H | 0.97202600  | 3.67145300  | 0.22456600  | H | 3.27100600 | -1.15495300 | 1.75233800  |
| H | -0.39313100 | 1.92013500  | 2.31677000  | H | 2.22634900 | 0.09504200  | 2.47429300  |
| H | -1.23676200 | 3.12194900  | 1.32124500  | N | 2.06739300 | -0.09505400 | 0.38349300  |
| H | -3.56290000 | -0.02540300 | -2.90862500 | H | 2.11388700 | -0.82504500 | -0.34782000 |
| H | -5.70443100 | -1.23822900 | -3.08480300 | H | 1.14014800 | 0.35285100  | 0.32084600  |
| H | -6.36555200 | -2.85472200 | -1.32464900 | H | 2.77611600 | 0.62332600  | 0.17170100  |
| C | 2.28776700  | -0.69116400 | 1.72777500  | H | 1.52427100 | -1.44373400 | 1.90961600  |

#### 4. Conformational analysis of 2-Ph-18c6 and its K<sup>+</sup>complex

**Table S10.** Relative energies and corresponding Boltzmann populations  $\chi$  of the 14 lowest energy conformers ( $\Sigma\chi > 97\%$ ) of **2-Ph-18c6** at B3LYP/6-311G++(2d,p)/IEFPCM(CHCl<sub>3</sub>). XYZ-coordinates for the first six structures can be found below.

| Conformer     | $\Delta E_{ZPC}$ | $\Delta G_{298K}$ | $\chi(\Delta E_{ZPC})$ | $\chi(\Delta G_{298K})$ |
|---------------|------------------|-------------------|------------------------|-------------------------|
|               | [ kcal / mol ]   | [ kcal / mol ]    | [ % ]                  | [ % ]                   |
| 2-Ph-18c6_c1  | 0.00             | 0.00              | 56.79                  | 63.69                   |
| 2-Ph-18c6_c2  | 1.01             | 0.95              | 10.37                  | 12.87                   |
| 2-Ph-18c6_c3  | 1.18             | 1.51              | 7.75                   | 5.01                    |
| 2-Ph-18c6_c4  | 1.20             | 1.61              | 7.52                   | 4.22                    |
| 2-Ph-18c6_c5  | 1.46             | 2.07              | 4.84                   | 1.93                    |
| 2-Ph-18c6_c6  | 1.58             | 1.99              | 3.92                   | 2.20                    |
| 2-Ph-18c6_c7  | 2.07             | 2.40              | 1.73                   | 1.12                    |
| 2-Ph-18c6_c8  | 2.50             | 2.46              | 0.83                   | 1.01                    |
| 2-Ph-18c6_c9  | 2.51             | 2.60              | 0.82                   | 0.78                    |
| 2-Ph-18c6_c10 | 2.65             | 2.36              | 0.64                   | 1.17                    |
| 2-Ph-18c6_c11 | 2.70             | 2.57              | 0.60                   | 0.84                    |
| 2-Ph-18c6_c12 | 2.76             | 1.98              | 0.54                   | 2.25                    |
| 2-Ph-18c6_c13 | 2.81             | 3.17              | 0.49                   | 0.30                    |
| 2-Ph-18c6_c14 | 2.97             | 3.22              | 0.38                   | 0.28                    |

$\Delta E_{ZPC}$  referenced to -1153.961968 hartree /  $\Delta G_{298K}$  referenced to -1154.018677 hartree

**Table S11.** Relative energies and corresponding Boltzmann populations  $\chi$  of the 14 lowest energy conformers ( $\Sigma\chi > 97\%$ ) of **K<sup>+</sup>/2-Ph-18c6** at B3LYP/6-311G++(2d,p)/IEFPCM(CHCl<sub>3</sub>). XYZ-coordinates for the first six structures can be found below.

| Conformer                      | $\Delta E_{ZPC}$<br>[ kcal / mol ] | $\Delta G_{298K}$<br>[ kcal / mol ] | $\chi(\Delta E_{ZPC})$<br>[ % ] | $\chi(\Delta G_{298K})$<br>[ % ] |
|--------------------------------|------------------------------------|-------------------------------------|---------------------------------|----------------------------------|
| K <sup>+</sup> / 2-Ph-18c6_c1  | 0.00                               | 0.00                                | 79.97                           | 92.82                            |
| K <sup>+</sup> / 2-Ph-18c6_c2  | 2.08                               | 2.57                                | 2.37                            | 1.20                             |
| K <sup>+</sup> / 2-Ph-18c6_c3  | 2.10                               | 2.85                                | 2.32                            | 0.75                             |
| K <sup>+</sup> / 2-Ph-18c6_c4  | 2.12                               | 2.87                                | 2.23                            | 0.73                             |
| K <sup>+</sup> / 2-Ph-18c6_c5  | 2.20                               | 3.38                                | 1.94                            | 0.31                             |
| K <sup>+</sup> / 2-Ph-18c6_c6  | 2.27                               | 3.48                                | 1.74                            | 0.26                             |
| K <sup>+</sup> / 2-Ph-18c6_c7  | 2.74                               | 3.44                                | 0.79                            | 0.28                             |
| K <sup>+</sup> / 2-Ph-18c6_c8  | 2.78                               | 3.34                                | 0.74                            | 0.33                             |
| K <sup>+</sup> / 2-Ph-18c6_c9  | 2.79                               | 3.19                                | 0.72                            | 0.43                             |
| K <sup>+</sup> / 2-Ph-18c6_c10 | 2.83                               | 3.45                                | 0.67                            | 0.27                             |
| K <sup>+</sup> / 2-Ph-18c6_c11 | 2.83                               | 3.32                                | 0.67                            | 0.34                             |
| K <sup>+</sup> / 2-Ph-18c6_c12 | 2.86                               | 3.47                                | 0.64                            | 0.27                             |
| K <sup>+</sup> / 2-Ph-18c6_c13 | 2.86                               | 3.54                                | 0.64                            | 0.24                             |
| K <sup>+</sup> / 2-Ph-18c6_c14 | 2.87                               | 3.36                                | 0.63                            | 0.32                             |
| K <sup>+</sup> / 2-Ph-18c6_c15 | 2.87                               | 3.40                                | 0.62                            | 0.30                             |
| K <sup>+</sup> / 2-Ph-18c6_c16 | 2.90                               | 3.59                                | 0.60                            | 0.22                             |

$\Delta E_{ZPC}$  referenced to -1153.961968 hartree /  $\Delta G_{298K}$  referenced to -1154.018677 hartree

#### 4.1 Cartesian Coordinates of 2-Ph-18c6

|                     |             |             |             |                     |             |             |             |
|---------------------|-------------|-------------|-------------|---------------------|-------------|-------------|-------------|
| <b>2-Ph-18c6_c1</b> |             |             |             | C                   | 1.83865800  | 3.97724500  | -0.80511400 |
| O                   | -2.19304800 | 0.88368000  | 0.17444400  | H                   | 2.30871600  | 4.96991600  | -0.86421200 |
| O                   | -0.85663900 | -1.50055600 | 1.08296500  | H                   | 2.07705100  | 3.43333100  | -1.72868200 |
| O                   | 1.85194600  | -1.30814700 | 2.23633300  | C                   | 0.34309300  | 4.15374100  | -0.69250900 |
| O                   | 2.32625600  | 3.26939500  | 0.32129500  | H                   | 0.01759400  | 4.88531200  | -1.44662700 |
| O                   | -0.30742600 | 2.91219100  | -0.90452200 | H                   | 0.08906300  | 4.55310000  | 0.29846100  |
| O                   | 3.61251800  | 0.80387400  | 1.20657600  | C                   | -1.71937000 | 3.01492700  | -0.82823000 |
| C                   | -2.76520300 | -0.41638500 | 0.09022800  | H                   | -2.08945700 | 3.68425900  | -1.61862400 |
| H                   | -2.43219900 | -0.90020400 | -0.83740700 | H                   | -2.02079200 | 3.43650000  | 0.13990900  |
| C                   | -2.23463000 | -1.23299000 | 1.26146900  | C                   | -2.35430400 | 1.65646300  | -1.00903900 |
| H                   | -2.79833100 | -2.17392400 | 1.32027400  | H                   | -1.89276700 | 1.14105500  | -1.86102900 |
| H                   | -2.40223500 | -0.67823800 | 2.19474200  | H                   | -3.41951100 | 1.79719000  | -1.23046500 |
| C                   | -0.32460200 | -2.30274900 | 2.12585300  | C                   | -4.28707200 | -0.39143100 | 0.11475800  |
| H                   | -0.50035600 | -1.82749500 | 3.09990100  | C                   | -4.97067600 | 0.44005100  | 1.00429500  |
| H                   | -0.81842800 | -3.28519200 | 2.13324700  | H                   | -4.40899000 | 1.10380900  | 1.65072800  |
| C                   | 1.15792800  | -2.50308100 | 1.92166900  | C                   | -6.36103900 | 0.43206600  | 1.05374300  |
| H                   | 1.49660900  | -3.32128900 | 2.57400300  | H                   | -6.87886500 | 1.08389000  | 1.74777700  |
| H                   | 1.35303400  | -2.79542700 | 0.88136700  | C                   | -7.08713200 | -0.40918900 | 0.21431000  |
| C                   | 3.25148100  | -1.41235100 | 2.03532100  | H                   | -8.17006200 | -0.41372000 | 0.25170400  |
| H                   | 3.46672400  | -1.74279800 | 1.01065700  | C                   | -6.41421700 | -1.23883900 | -0.67735600 |
| H                   | 3.67973800  | -2.15150600 | 2.72800000  | H                   | -6.97142600 | -1.89088000 | -1.33980100 |
| C                   | 3.90312400  | -0.07237100 | 2.28192400  | C                   | -5.02282200 | -1.22615100 | -0.72630800 |
| H                   | 4.98985400  | -0.21532200 | 2.37243300  | H                   | -4.50389000 | -1.86982000 | -1.42894800 |
| H                   | 3.53599700  | 0.34798000  | 3.22748400  | <b>2-Ph-18c6_c2</b> |             |             |             |
| C                   | 4.11975700  | 2.11239400  | 1.40390900  | O                   | -2.04289200 | 0.83676800  | -0.30412100 |
| H                   | 5.21761600  | 2.09019400  | 1.46645700  | O                   | -0.89078000 | -2.46788300 | 0.48746400  |
| H                   | 3.73441700  | 2.53352400  | 2.34196000  | O                   | 1.63814600  | -1.65348900 | 1.99244500  |
| C                   | 3.71374800  | 2.99144000  | 0.24507000  | O                   | 1.88021600  | 3.34323700  | 0.49833800  |
| H                   | 4.29268600  | 3.92576300  | 0.28388600  |                     |             |             |             |
| H                   | 3.94939400  | 2.48491800  | -0.70014600 |                     |             |             |             |

|   |             |              |             |   |             |             |             |
|---|-------------|--------------|-------------|---|-------------|-------------|-------------|
| O | -0.46458200 | 3.08467600   | -1.19164000 | C | -2.54364300 | -1.36367500 | 2.37949100  |
| O | 3.15058600  | 0.84286600   | 1.43567600  | H | -3.58482000 | -1.70173200 | 2.27886400  |
| C | -1.92005300 | -0.536215200 | -0.53602200 | H | -2.03744600 | -2.01375200 | 3.09019700  |
| H | -1.26433800 | -0.73163300  | -1.39964800 | C | -1.74680600 | -2.69551600 | 0.58693900  |
| C | -1.20368900 | -1.09773000  | 0.70465800  | H | -2.73127500 | -3.16009000 | 0.43595900  |
| H | -1.85191100 | -0.99306700  | 1.58458300  | H | -1.17536600 | -3.32775600 | 1.28134800  |
| H | -0.29946300 | -0.50810300  | 0.86636700  | C | -1.00204800 | -2.61836900 | -0.72406100 |
| C | -0.24706000 | -3.11128400  | 1.57956800  | H | -0.11430500 | -1.99315000 | -0.60432500 |
| H | -0.66543700 | -2.76066000  | 2.53088500  | H | -0.68453100 | -3.62968000 | -1.01407200 |
| H | -0.47757800 | -4.17493000  | 1.47974500  | C | -1.24992200 | -1.87879400 | -2.99341400 |
| C | 1.26267300  | -2.96370600  | 1.59191000  | H | -2.05047100 | -1.96512900 | -3.73269800 |
| H | 1.67903600  | -3.70288900  | 2.29330400  | H | -0.51621900 | -2.66836100 | -3.19830900 |
| H | 1.66177500  | -3.18391900  | 0.59272300  | C | -0.60894800 | -0.51485600 | -3.16728500 |
| C | 3.04687300  | -1.48368900  | 2.03793200  | H | -0.42909000 | -0.34850700 | -4.23803900 |
| H | 3.48639600  | -1.67934900  | 1.05100700  | H | -1.29906600 | 0.26136600  | -2.81181500 |
| H | 3.48443500  | -2.19634000  | 2.75154300  | C | 1.86032200  | 1.16449800  | -3.81685000 |
| C | 3.39518300  | -0.08312800  | 2.48239500  | C | 1.74776100  | 2.44194000  | -4.36576900 |
| H | 4.45896700  | -0.06110100  | 2.75997300  | H | 1.17093800  | 3.19911600  | -3.84506600 |
| H | 2.80807500  | 0.18120400   | 3.37196200  | C | 2.36320200  | 2.75320200  | -5.75486600 |
| C | 3.52488700  | 2.16578500   | 1.78804200  | H | 2.26376200  | 3.75028700  | -5.98936300 |
| H | 4.59522800  | 2.19695600   | 2.03788800  | C | 3.09655200  | 1.78524200  | -6.25321900 |
| H | 2.96166900  | 2.50044200   | 2.66916500  | C | 3.57285600  | 2.02386600  | -7.19678800 |
| C | 3.27103900  | 3.10635100   | 0.63400000  | H | 3.20896600  | 0.50531500  | -5.71607500 |
| H | 3.79864300  | 4.05157900   | 0.82808900  | H | 3.77493100  | -0.25514000 | -6.24149800 |
| H | 3.67709400  | 2.67526100   | -0.29069400 | C | 2.59560100  | 0.19786000  | -4.50566200 |
| C | 1.56767400  | 4.18773400   | -0.59725100 | H | 2.67562900  | -0.80205200 | -4.09611300 |
| H | 1.99852700  | 5.18750000   | -0.44225900 |   |             |             |             |
| H | 1.98661800  | 3.77739700   | -1.52556900 |   |             |             |             |
| C | 0.06814000  | 4.31248500   | -0.72779300 |   |             |             |             |
| H | -0.16356900 | 5.12462400   | -1.43204100 |   |             |             |             |
| H | -0.36674700 | 4.57231900   | 0.24614900  |   |             |             |             |
| C | -1.88163700 | 3.03965200   | -1.19858200 |   |             |             |             |
| H | -2.28490000 | 3.69656500   | -1.98260800 |   |             |             |             |
| H | -2.27856400 | 3.37849900   | -0.23279800 |   |             |             |             |
| C | -2.32374700 | 1.61862000   | -1.45807300 |   |             |             |             |
| H | -1.78330700 | 1.22105300   | -2.32534700 |   |             |             |             |
| H | -3.39646600 | 1.60349200   | -1.68654600 |   |             |             |             |
| C | -3.25608900 | -1.23303300  | -0.80365800 |   |             |             |             |
| C | -4.36447800 | -0.95241900  | -0.00112100 |   |             |             |             |
| H | -4.27026400 | -0.23425900  | 0.80517500  |   |             |             |             |
| C | -5.58537300 | -1.57497300  | -0.23600300 |   |             |             |             |
| H | -6.43760000 | -1.34549200  | 0.39326700  |   |             |             |             |
| C | -5.71540500 | -2.49104000  | -1.27797100 |   |             |             |             |
| H | -6.66699100 | -2.97604000  | -1.46135700 |   |             |             |             |
| C | -4.61798400 | -2.77504000  | -2.08394500 |   |             |             |             |
| H | -4.71085100 | -3.48280300  | -2.89951400 |   |             |             |             |
| C | -3.39813300 | -2.14555500  | -1.84779600 |   |             |             |             |
| H | -2.54673400 | -2.36745300  | -2.48194200 |   |             |             |             |

### 2-Ph-18c6\_c3

|   |             |             |             |
|---|-------------|-------------|-------------|
| O | 0.61526000  | -0.44220200 | -2.44296400 |
| O | 1.61450000  | 0.87925200  | -0.10665300 |
| O | 1.21398800  | 2.04922300  | 2.57796600  |
| O | -1.88984700 | -1.39087800 | 1.12350300  |
| O | -1.86253200 | -2.08167900 | -1.72634000 |
| O | -1.21114900 | 0.40421300  | 3.28644300  |
| C | 1.22442300  | 0.84644500  | -2.47239600 |
| H | 0.46606900  | 1.60720000  | -2.24794700 |
| C | 2.26620300  | 0.88780100  | -1.36120800 |
| H | 2.87363100  | 1.79575900  | -1.47142300 |
| H | 2.93345600  | 0.01954800  | -1.45857200 |
| C | 2.51455800  | 0.80712200  | 0.98871100  |
| H | 3.19071000  | 1.67327600  | 0.98789100  |
| H | 3.12700800  | -0.10214400 | 0.90965500  |
| C | 1.73649300  | 0.75475500  | 2.28101200  |
| H | 2.41173900  | 0.43923800  | 3.08857900  |
| H | 0.92774800  | 0.02563800  | 2.19499200  |
| C | 0.42188400  | 2.11093400  | 3.75741400  |
| H | 0.83626400  | 1.45406600  | 4.53263600  |
| H | 0.49078300  | 3.14090300  | 4.11672100  |
| C | -1.04439600 | 1.79174300  | 3.53486200  |
| H | -1.41844400 | 2.37327400  | 2.68255200  |
| H | -1.61255500 | 2.09167700  | 4.42884500  |
| C | -2.53335100 | 0.05122200  | 2.90825400  |
| H | -3.20939900 | 0.12296600  | 3.77182000  |
| H | -2.89860800 | 0.73272000  | 2.13013500  |

### 2-Ph-18c6\_c4

|   |              |             |             |
|---|--------------|-------------|-------------|
| O | 1.35257700   | -0.23254700 | -2.50322300 |
| O | 1.46730000   | 1.10997800  | 0.05566800  |
| O | 0.96098100   | 1.30373600  | 2.93360800  |
| O | -1.78509900  | -1.40592200 | 1.22935600  |
| O | -0.82826000  | -2.04511600 | -1.43493200 |
| O | -1.37458700  | -0.32539300 | 3.92785500  |
| C | 0.45424500   | 0.80723600  | -2.10505700 |
| H | -0.371110800 | 0.371110800 | -1.53065900 |
| C | 1.23099000   | 1.74342200  | -1.18823300 |
| H | 0.64696900   | 2.66047100  | -1.03687300 |
| H | 2.17908600   | 2.02026700  | -1.67133300 |
| C | 2.17800400   | 1.93225600  | 0.96641100  |
| H | 1.68601800   | 2.90970200  | 1.06397700  |
| H | 3.20193400   | 2.10311300  | 0.60509000  |
| C | 2.23891700   | 1.25765000  | 2.31610200  |
| H | 2.98010400   | 1.77445100  | 2.91828000  |
| H | 2.56280900   | 0.21644500  | 2.19297700  |
| C | 0.90521000   | 0.57158100  | 4.14870700  |
| H | 1.26231300   | -0.45364900 | 3.98713100  |
| H | 1.55103500   | 1.04255300  | 4.90579400  |
| C | -0.51667400  | 0.52849500  | 4.67470600  |
| H | -0.93116000  | 1.54250600  | 4.72874600  |
| H | -0.48707500  | 0.12375900  | 5.68982300  |
| C | -2.06662700  | 0.31385600  | 2.85618200  |
| H | -2.82152200  | 1.00068800  | 3.26331800  |
| H | -1.37064800  | 0.88199000  | 2.23529400  |
| C | -2.75402700  | -0.72955700 | 2.00972500  |
| H | -3.48338100  | -0.23120300 | 1.35531800  |
| H | -3.29998300  | -1.43727800 | 2.64916500  |
| C | -2.33617700  | -2.40719200 | 0.38948900  |
| H | -3.11868100  | -1.97988700 | -0.25300000 |
| H | -2.79073900  | -3.20740300 | 0.99082700  |
| C | -1.23770800  | -2.99558400 | -0.46303600 |
| H | -0.38969000  | -3.27327400 | 0.17554300  |
| H | -1.60799700  | -3.90554700 | -0.95609500 |
| C | 0.32901700   | -2.44858800 | -2.15155400 |
| H | 0.12147900   | -3.36856300 | -2.71954400 |
| H | 1.15020000   | -2.65751200 | -1.45378700 |
| C | 0.74922700   | -1.36529800 | -3.12484700 |
| H | 1.580964500  | -1.78445900 | -3.78840400 |
| H | -0.10353000  | -1.06302100 | -3.74166800 |
| C | -0.10084400  | 1.57667000  | -3.29433300 |
| C | 0.70854400   | 1.89254500  | -4.38731400 |
| H | 1.73396700   | 1.54355200  | -4.40755200 |
| C | 0.20381500   | 2.63345400  | -5.45154600 |
| H | 0.84293500   | 2.86917500  | -6.29463700 |
| C | -1.11838700  | 3.07018100  | -5.43665400 |
| H | -1.51196100  | 3.64478100  | -6.26681400 |

|   |             |            |             |   |             |            |             |
|---|-------------|------------|-------------|---|-------------|------------|-------------|
| C | -1.93343500 | 2.75725000 | -4.35288000 | H | -5.14085400 | 0.03754200 | -0.48815500 |
| H | -2.96634700 | 3.08501900 | -4.33695300 |   |             |            |             |
| C | -1.42617400 | 2.01294300 | -3.29149700 |   |             |            |             |
| H | -2.06850200 | 1.76368100 | -2.45356500 |   |             |            |             |

#### 2-Ph-18c6\_c5

|   |             |             |             |
|---|-------------|-------------|-------------|
| O | -1.38955900 | 1.02042400  | -1.33437100 |
| O | -1.17966400 | -1.80882200 | -0.93443900 |
| O | 1.52708600  | -2.87388800 | -0.60105600 |
| O | 3.19870600  | 1.78783600  | 0.11650400  |
| O | 0.51913100  | 2.92830500  | -0.33306400 |
| O | 3.42326200  | -1.07315200 | 0.71155300  |
| C | -2.52836800 | 0.17531400  | -1.23050700 |
| H | -3.31721100 | 0.55002200  | -1.90026200 |
| C | -2.12665700 | -1.19112400 | -1.78106000 |
| H | -3.02776400 | -1.81476500 | -1.87020500 |
| H | -1.70600800 | -1.04933300 | -2.78529500 |
| C | -0.71358800 | -3.05077900 | -1.43298700 |
| H | -0.27758500 | -2.92208100 | -2.43272100 |
| H | -1.54626400 | -3.76447600 | -1.51375100 |
| C | 0.32376800  | -3.61565400 | -0.49113300 |
| H | -0.05603100 | -3.57602500 | 0.53805700  |
| H | 0.50259100  | -4.67015100 | -0.74739500 |
| C | 2.50305000  | -3.25657700 | 0.35260900  |
| H | 2.80664700  | -4.30109500 | 0.18945700  |
| H | 2.09388200  | -3.17680600 | 1.36843000  |
| C | 3.71941400  | -2.37049600 | 0.22332100  |
| H | 4.54415300  | -2.81423700 | 0.80004600  |
| H | 4.03005400  | -2.32003600 | -0.82867800 |
| C | 4.50529900  | -0.16917400 | 0.56760800  |
| H | 4.81973400  | -0.11475000 | -0.48310900 |
| H | 5.36567600  | -0.50925500 | 1.16249300  |
| C | 4.09465800  | 1.20316100  | 1.04605500  |
| H | 3.62260300  | 1.12524900  | 2.03440700  |
| H | 4.99548200  | 1.82593200  | 1.14800800  |
| C | 2.75639000  | 3.07647700  | 0.51024700  |
| H | 3.60857100  | 3.76970400  | 0.56148000  |
| H | 2.29240200  | 3.03469100  | 1.50462200  |
| C | 1.75821800  | 3.59813800  | -0.49624700 |
| H | 1.62744900  | 4.67988400  | -0.34831400 |
| H | 2.14726300  | 3.43844200  | -1.51026900 |
| C | -0.39655400 | 3.19190700  | -1.38209100 |
| H | 0.04844000  | 2.91890300  | -2.34804200 |
| H | -0.64851800 | 4.26224100  | -1.41260600 |
| C | -1.66476000 | 2.40264300  | -1.16128400 |
| H | -2.05511500 | 2.59963100  | -0.15653200 |
| H | -2.41761000 | 2.73255900  | -1.89145200 |
| C | -3.09807000 | 0.10331100  | 0.17780600  |
| C | -2.25833100 | 0.09695300  | 1.29253000  |
| H | -1.18861000 | 0.16787600  | 1.14502900  |
| C | -2.79095000 | 0.00370000  | 2.57385000  |
| H | -2.12858600 | 0.00176400  | 3.43182200  |
| C | -4.16888700 | -0.08972200 | 2.75809500  |
| H | -4.58176600 | -0.16212600 | 3.75750100  |
| C | -5.01236700 | -0.08213100 | 1.65180500  |
| H | -6.08614700 | -0.14589800 | 1.78482600  |
| C | -4.47679400 | 0.01951000  | 0.37024100  |

#### 2-Ph-18c6\_c6

|   |             |             |             |
|---|-------------|-------------|-------------|
| O | 0.63756900  | 2.76469000  | -0.33278700 |
| O | 0.38672700  | 0.72795600  | -2.43322300 |
| O | 0.04436100  | -1.97231300 | -1.41092500 |
| O | -0.52259700 | -1.73336000 | 2.86003700  |
| O | 0.37478100  | 0.83902900  | 1.85951400  |
| O | -0.76973800 | -3.83396100 | 0.71949200  |
| C | 0.70163200  | 3.01470100  | -1.73589100 |
| H | 1.73622000  | 2.90079900  | -2.08090000 |
| C | -0.17274300 | 2.02787100  | -2.51149000 |
| H | -0.24484700 | 2.34787900  | -3.56043300 |
| H | -1.18253400 | 2.03717400  | -2.08064500 |
| C | -0.44273600 | -0.26907600 | -3.01276300 |
| H | -0.54037300 | -0.09865700 | -4.09420200 |
| H | -1.44508300 | -0.23101900 | -2.56824800 |
| C | 0.16300500  | -1.63320900 | -2.78041100 |
| H | 1.21918200  | -1.62731100 | -3.08398800 |
| H | -0.36460000 | -2.36794000 | -3.40533100 |
| C | 0.68989700  | -3.18835600 | -1.07179500 |
| H | 0.25013200  | -4.02703600 | -1.62956400 |
| H | 1.75710500  | -3.13183300 | -1.32931400 |
| C | 0.56312500  | -3.42634100 | 0.41344200  |
| H | 0.81721600  | -2.51104300 | 0.95307600  |
| H | 1.26564400  | -4.21811400 | 0.70861500  |
| C | -1.04389800 | -3.96384500 | 2.10895200  |
| H | -1.82151800 | -4.72694300 | 2.19907400  |
| H | -0.15648400 | -4.32207600 | 2.64513300  |
| C | -1.56387400 | -2.69172800 | 2.75035700  |
| H | -1.96529500 | -2.93458000 | 3.74634500  |
| H | -2.38356500 | -2.28786100 | 2.14241200  |
| C | -0.97346900 | -0.47177400 | 3.33003800  |
| H | -1.29236800 | -0.54920400 | 4.37915400  |
| H | -1.83128800 | -0.13196200 | 2.73620900  |
| C | 0.14365200  | 0.53876500  | 3.22419800  |
| H | -0.14385300 | 1.44660300  | 3.77360000  |
| H | 1.05538800  | 0.13709200  | 3.68798700  |
| C | 1.46901700  | 1.71737400  | 1.65641900  |
| H | 2.38563500  | 1.28114500  | 2.07854600  |
| H | 1.28882000  | 2.67862600  | 2.15752500  |
| C | 1.67819700  | 1.93311200  | 0.17693700  |
| H | 2.64971800  | 2.42335000  | 0.02627300  |
| H | 1.68451900  | 0.97013400  | -0.33829600 |
| C | 0.24988000  | 4.43587300  | -2.01390200 |
| C | -0.74712900 | 5.03812600  | -1.24500000 |
| H | -1.17483000 | 4.49768400  | -0.41028100 |
| C | -1.17869500 | 6.32924700  | -1.53491000 |
| H | -1.95144700 | 6.78601300  | -0.92750600 |
| C | -0.62107600 | 7.03436700  | -2.59777400 |
| H | -0.95599500 | 8.04053900  | -2.82053300 |
| C | 0.37446500  | 6.44112900  | -3.36842100 |
| H | 0.82091400  | 6.98448000  | -4.19300200 |
| C | 0.80570000  | 5.15068800  | -3.07592500 |
| H | 1.58753500  | 4.69809500  | -3.67687400 |

## 4.2 Cartesian Coordinates of K+/2-Ph-18c6

#### K+/2-Ph-18c6\_c1

|   |             |             |             |   |             |            |             |
|---|-------------|-------------|-------------|---|-------------|------------|-------------|
| C | -2.66437600 | -0.32336500 | -0.63578500 | H | -3.34419400 | 1.61556500 | -0.04820900 |
| H | -3.56333000 | -0.56798900 | -1.21235800 | O | -1.87245900 | 0.93303800 | 1.23325900  |
| C | -3.04216200 | 0.68148000  | 0.44160400  | C | -2.03549200 | 2.01570700 | 2.15407600  |
| C | -4.20667900 | 0.15106800  | 1.26109900  | C | -0.82195100 | 2.11490900 | 3.04304300  |
| C | -5.49068300 | 0.66011400  | 1.06935400  | H | -0.62709200 | 1.14907600 | 3.52502300  |
| C | -6.57046300 | 0.14986400  | 1.78469500  | O | 0.31070100  | 2.51542100 | 2.27473200  |
| C | -6.37349300 | -0.87310800 | 2.70653000  | C | 1.49914600  | 2.61215200 | 3.05699200  |
| C | -5.09332800 | -1.38253900 | 2.90928600  | C | 2.62312300  | 3.13831000 | 2.20037100  |
| C | -4.01709800 | -0.87528000 | 2.18929300  | H | 3.50698400  | 3.29296800 | 2.83141600  |
| H | -3.02242900 | -1.27059600 | 2.35828900  | O | 2.91353600  | 2.19742900 | 1.16998700  |
| H | -4.93340300 | -2.17676100 | 3.62880600  | C | 3.98028800  | 2.61782100 | 0.32318100  |
| H | -7.21136700 | -1.26877800 | 3.26778500  | C | 4.21730100  | 1.57496200 | -0.74004200 |
| H | -7.56222900 | 0.55622600  | 1.62659200  | H | 4.41602500  | 0.59926900 | -0.27945400 |
| H | -5.64909300 | 1.46370100  | 0.35814200  | O | 3.07044700  | 1.49303700 | -1.58243700 |
|   |             |             |             | C | 3.23740300  | 0.57451700 | -2.65932200 |

|                                     |             |             |             |                                     |              |             |             |
|-------------------------------------|-------------|-------------|-------------|-------------------------------------|--------------|-------------|-------------|
| C                                   | 1.98843100  | 0.56687400  | -3.50459100 | H                                   | -4.22701900  | -2.67270900 | 0.28726800  |
| H                                   | 1.75780900  | 1.58224800  | -3.84968400 | H                                   | 2.60419400   | -0.78762100 | -0.36892400 |
| O                                   | 0.90431200  | 0.05324500  | -2.73481300 | K                                   | -1.93137700  | 0.23941100  | -0.74177600 |
| C                                   | -0.31815000 | -0.00762800 | -3.46495300 |                                     |              |             |             |
| C                                   | -1.38332900 | -0.63279300 | -2.60020900 | <b>K<sup>+</sup> / 2-Ph-18c6_c3</b> |              |             |             |
| H                                   | -2.28767200 | -0.78392900 | -3.20189200 | O                                   | 2.03394500   | -0.92595500 | -1.15786600 |
| H                                   | -1.04536300 | -1.61075200 | -2.23602700 | O                                   | 1.63595200   | 1.77237600  | -0.63032100 |
| O                                   | -1.67054200 | 0.22510500  | -1.49593300 | O                                   | -0.76053300  | 2.56598300  | 0.70501900  |
| H                                   | -0.18987600 | -0.62117300 | -4.36500700 | O                                   | -1.85823700  | -2.14001100 | 1.48477500  |
| H                                   | -0.62181500 | 0.99959400  | -3.77622300 | O                                   | 0.55154200   | -2.92179900 | 0.15318600  |
| H                                   | 2.15826300  | -0.06489800 | -4.38495800 | O                                   | -2.14882100  | 0.59512100  | 2.22719800  |
| H                                   | 4.08792800  | 0.87501100  | -3.28324400 | C                                   | 3.04469600   | 0.01905000  | -1.51925700 |
| H                                   | 3.43583900  | -0.43118100 | -2.26866200 | H                                   | 3.48532500   | -0.28807600 | -2.47694500 |
| H                                   | 5.09756100  | 1.86298200  | -1.32775600 | C                                   | 2.33138800   | 1.33961700  | -1.79239200 |
| H                                   | 4.89928200  | 2.74440800  | 0.90841100  | H                                   | 3.07494400   | 2.08663600  | -2.09307800 |
| H                                   | 3.73271800  | 3.57998200  | -0.14166100 | H                                   | 1.62533500   | 1.20185400  | -2.62108200 |
| H                                   | 2.34300500  | 4.10281800  | 1.75902800  | C                                   | 1.04812800   | 3.06194000  | -0.78680400 |
| H                                   | 1.34285800  | 3.30111100  | 3.89593800  | H                                   | 0.34092800   | 3.05393100  | -1.62580300 |
| H                                   | 1.75995800  | 1.62749500  | 3.46484300  | H                                   | 1.82492100   | 3.80618000  | -0.99980500 |
| H                                   | -1.02046300 | 2.85585600  | 3.82713300  | C                                   | 0.34022200   | 3.44662700  | 0.48832400  |
| H                                   | -2.91301400 | 1.84734400  | 2.78582700  | H                                   | 1.03421800   | 3.39558500  | 1.33592500  |
| H                                   | -2.18261000 | 2.95285800  | 1.60314500  | H                                   | -0.01675600  | 4.47980600  | 0.39769800  |
| H                                   | -2.29495200 | -1.24690000 | -0.17242400 | C                                   | -1.48743800  | 2.87176400  | 1.89297800  |
| K                                   | 0.61869300  | 1.21033300  | -0.17784500 | H                                   | -1.87634800  | 3.89610200  | 1.84403400  |
|                                     |             |             |             | H                                   | -0.82778900  | 2.79611800  | 2.76611200  |
|                                     |             |             |             | C                                   | -2.64681500  | 1.91678200  | 2.03266100  |
| <b>K<sup>+</sup> / 2-Ph-18c6_c2</b> |             |             |             | H                                   | -3.25453800  | 2.22132800  | 2.89353100  |
| O                                   | 0.42799800  | 1.71434200  | -0.56893600 | H                                   | -3.27850200  | 1.95236200  | 1.13638200  |
| O                                   | -2.01327400 | 3.08081000  | -0.82133200 | C                                   | -3.18374000  | -0.36929600 | 2.40439400  |
| O                                   | -4.42333200 | 1.55006200  | -0.67232000 | H                                   | -3.82607200  | -0.39909400 | 1.51543900  |
| O                                   | -4.27819800 | -1.24469000 | -1.21773600 | H                                   | -3.80480600  | -0.10175800 | 3.26783300  |
| O                                   | -1.80559600 | -2.57230700 | -0.72090700 | C                                   | -2.56792900  | -1.72462600 | 2.64940000  |
| O                                   | 0.60213400  | -1.04490500 | -0.85061500 | H                                   | -1.88694800  | -1.68151300 | 3.50830300  |
| C                                   | 2.12586200  | 1.13236000  | -2.27258800 | H                                   | -3.36665900  | -2.44019000 | 2.87944800  |
| C                                   | 1.21319100  | 0.96795600  | -3.31464500 | C                                   | -1.26719100  | -3.43000200 | 1.62683500  |
| H                                   | 0.15957300  | 0.85768800  | -3.09461800 | H                                   | -2.04258600  | -4.17873700 | 1.82961900  |
| C                                   | 1.64340200  | 0.95598500  | -4.63751500 | H                                   | -0.56148900  | -3.42938200 | 2.46655500  |
| H                                   | 0.92224900  | 0.83113000  | -5.43658400 | C                                   | -0.55635700  | -3.79773300 | 0.34853300  |
| C                                   | 2.99502100  | 1.10299500  | -4.93667900 | H                                   | -0.20780300  | -4.83517600 | 0.42021400  |
| H                                   | 3.32926500  | 1.09305300  | -5.96709300 | H                                   | -1.24701000  | -3.72570900 | -0.50096100 |
| C                                   | 3.91249700  | 1.27144800  | -3.90463600 | C                                   | 1.25594400   | -3.18623200 | -1.05797200 |
| H                                   | 4.96549700  | 1.39626100  | -4.12690100 | H                                   | 0.59400000   | -3.02001300 | -1.91731700 |
| C                                   | 3.47705400  | 1.29179000  | -2.58310200 | H                                   | 1.59212000   | -4.23018600 | -1.08113300 |
| H                                   | 4.19776200  | 1.43594600  | -1.78486400 | C                                   | 2.46571200   | -2.28760900 | -1.14409700 |
| C                                   | 1.70081700  | 1.10918600  | -0.81283100 | H                                   | 3.13452600   | -2.46533900 | -0.29674400 |
| H                                   | 2.46144400  | 1.64515100  | -0.22993000 | H                                   | 3.00882900   | -2.51940100 | -2.06798000 |
| C                                   | 1.63535000  | -0.29644800 | -0.22338200 | C                                   | 4.16970500   | 0.13877100  | -0.50289900 |
| H                                   | 1.44264300  | -0.22399000 | 0.85449600  | C                                   | 3.94268400   | 0.05341300  | 0.87085400  |
| C                                   | 0.56401600  | -2.40331400 | -0.41887400 | H                                   | 2.94445900   | -0.14034000 | 1.24010000  |
| H                                   | 1.51285500  | -2.89980900 | -0.65507700 | C                                   | 4.99122300   | 0.20392500  | 1.77263600  |
| H                                   | 0.41329100  | -2.44909800 | 0.66709600  | H                                   | 4.79965500   | 0.13113800  | 2.83671400  |
| C                                   | -0.55500400 | -3.12192800 | -1.13059300 | C                                   | 6.28237300   | 0.44763300  | 1.31271200  |
| H                                   | -0.51110100 | -4.18768600 | -0.87542800 | H                                   | 7.09834500   | 0.56469400  | 2.01562500  |
| H                                   | -0.43809800 | -3.02287100 | -2.21654400 | C                                   | 6.51952800   | 0.53074200  | -0.05551200 |
| C                                   | -2.92156700 | -3.21572100 | -1.33177800 | H                                   | 7.52220600   | 0.71027800  | -0.42462800 |
| H                                   | -2.86811200 | -3.10547300 | -2.42190300 | C                                   | 5.46950700   | 0.37089700  | -0.95465700 |
| H                                   | -2.91562100 | -4.28642000 | -1.09410900 | H                                   | 5.66582000   | 0.42396300  | -2.02040900 |
| C                                   | -4.19873300 | -2.60794600 | -0.80740800 | K                                   | -0.19835900  | -0.17357800 | 0.33768400  |
| H                                   | -5.04984700 | -3.17221500 | -1.20747800 |                                     |              |             |             |
| C                                   | -5.47211800 | -0.60096400 | -0.77831100 |                                     |              |             |             |
| H                                   | -6.35074300 | -1.12558900 | -1.17309100 | <b>K<sup>+</sup> / 2-Ph-18c6_c4</b> |              |             |             |
| H                                   | -5.52605800 | -0.61706700 | 0.31720500  | C                                   | 0.01255100   | -3.16973600 | -0.87510400 |
| C                                   | -5.48800500 | 0.82174800  | -1.27975100 | H                                   | -0.04339900  | -4.21673500 | -0.55327200 |
| H                                   | -6.45158100 | 1.27773000  | -1.02187300 | H                                   | 0.31140300   | -3.14923800 | -1.93013000 |
| H                                   | -5.38037600 | 0.84025300  | -2.37132900 | C                                   | 1.03689300   | -2.45408100 | -0.30350100 |
| C                                   | -4.38981100 | 2.91908500  | -1.07048600 | H                                   | 1.98330700   | -3.00622800 | -0.07565700 |
| H                                   | -4.26287900 | 2.99109600  | -2.15771900 | H                                   | 0.70809400   | -2.42052100 | 1.01572700  |
| H                                   | -5.33153400 | 3.41261500  | -0.80109600 | C                                   | 2.18015100   | -0.39205200 | 0.21541100  |
| C                                   | -3.25336200 | 3.61678200  | -0.36556500 | H                                   | 1.82604500   | -0.24814400 | 1.24410900  |
| H                                   | -3.34433600 | 3.48440100  | 0.71965800  | C                                   | 2.41174200   | 0.97195500  | -0.42748100 |
| H                                   | -3.30272400 | 4.69006100  | -0.58578500 | H                                   | 3.10103000   | 1.50601800  | 0.23973900  |
| C                                   | -0.88641600 | 3.67581200  | -0.18210900 | C                                   | -0.10736100  | 3.68221900  | -0.37684300 |
| H                                   | -0.90074200 | 4.76330200  | -0.32506800 | H                                   | -0.063549300 | 4.76149700  | -0.55944600 |
| H                                   | -0.91843200 | 3.47079700  | 0.89535100  | H                                   | -0.35695500  | 3.52902200  | 0.68069400  |
| C                                   | 0.38412300  | 3.12600000  | -0.78416300 | C                                   | 1.22357700   | 3.04795100  | -0.70027800 |
| H                                   | 1.23908600  | 3.60774400  | -0.29565600 | H                                   | 1.99546300   | 3.51628900  | -0.07830900 |
| H                                   | 0.42774800  | 3.34862400  | -1.85452700 | H                                   | 1.47981800   | 3.21260700  | -1.75117500 |

|   |             |             |             |
|---|-------------|-------------|-------------|
| C | -3.41850700 | 3.03026700  | -1.87304400 |
| H | -3.09335300 | 3.01539400  | -2.92054000 |
| H | -4.36475300 | 3.58170900  | -1.81473100 |
| C | -2.39202600 | 3.73003100  | -1.01787800 |
| H | -2.68559400 | 3.68259300  | 0.03815200  |
| H | -2.34093900 | 4.78518500  | -1.31267000 |
| C | -4.73641000 | -0.40559200 | -1.54945100 |
| H | -5.56002400 | -0.91836300 | -2.06094600 |
| H | -4.98264900 | -0.33978700 | -0.48238400 |
| C | -4.58285900 | 0.97571500  | -2.13621600 |
| H | -5.54846400 | 1.49323800  | -2.08260300 |
| H | -4.28737000 | 0.90874200  | -3.19050900 |
| C | -3.59655700 | -2.46587600 | -1.22849200 |
| H | -3.82166100 | -2.45416800 | -0.15494300 |
| H | -4.39570900 | -3.01498300 | -1.74121500 |
| C | -2.28494300 | -3.16736500 | -1.47924800 |
| H | -2.03403300 | -3.13092800 | -2.54655100 |
| H | -2.38418300 | -4.21950600 | -1.18590900 |
| O | 1.21933600  | -1.13042400 | -0.52842400 |
| O | -1.25743800 | -2.54053300 | -0.71500100 |
| O | -3.52228500 | -1.13169300 | -1.72590800 |
| O | 1.15218500  | 1.64884200  | -0.42014000 |
| O | -1.12117600 | 3.10978200  | -1.19966900 |
| O | -3.59911700 | 1.69752800  | -1.39867500 |
| C | 3.05777000  | 0.88879000  | -1.80151300 |
| C | 4.44882500  | 0.93874900  | -1.90055300 |
| C | 2.30735200  | 0.73400500  | -2.96694900 |
| C | 5.08045200  | 0.82004800  | -3.13474000 |
| H | 5.04590600  | 1.07556300  | -1.00493600 |
| C | 2.93469200  | 0.62415900  | -4.20380400 |
| H | 1.22684200  | 0.70990400  | -2.91195500 |
| C | 4.32347700  | 0.66191500  | -4.29124800 |
| H | 6.16154100  | 0.86091400  | -3.19287300 |
| H | 2.33816000  | 0.50872300  | -5.10104600 |
| H | 4.81133600  | 0.57610300  | -5.25467600 |
| H | 3.13255400  | -0.93320100 | 0.24980800  |
| K | -1.21367700 | 0.27100700  | -0.92012800 |

**K<sup>+</sup> / 2-Ph-18c6\_c5**

|   |             |             |             |
|---|-------------|-------------|-------------|
| O | 1.28308800  | -1.47248700 | -0.03340100 |
| O | 1.96238100  | 0.82898000  | -1.43350300 |
| O | 0.16953600  | 3.05036400  | -1.35846900 |
| O | -2.51207900 | 0.75508500  | 2.02548600  |
| O | -0.71310400 | -1.46961000 | 1.95007200  |
| O | -1.68617500 | 3.19173300  | 0.80063800  |
| C | 2.53178800  | -1.41279900 | -0.72844300 |
| H | 2.73552500  | -2.39772200 | -1.16898500 |
| C | 2.33000600  | -0.46137700 | -1.90380500 |
| H | 1.54241300  | -0.85974000 | -2.55588000 |
| H | 3.26103900  | -0.40682100 | -2.47955800 |
| C | 1.87456700  | 1.79428700  | -2.47886400 |
| H | 1.13250400  | 1.47786600  | -3.22258300 |
| H | 2.84424400  | 1.89327800  | -2.98134700 |
| C | 1.48876700  | 3.13035700  | -1.89442500 |
| H | 2.19693900  | 3.41800000  | -1.10791900 |
| H | 1.52782700  | 3.88823400  | -2.68632600 |
| C | -0.27727300 | 4.28385500  | -0.80031900 |
| H | -0.27157400 | 5.06841300  | -1.56682600 |
| H | 0.39217900  | 4.59220000  | 0.01210600  |
| C | -1.68446200 | 4.11969600  | -0.28201500 |
| H | -2.34440700 | 3.76361100  | -1.08270000 |
| H | -2.05231600 | 5.09539700  | 0.05781300  |
| C | -2.97897500 | 3.01198800  | 1.37480200  |
| H | -3.36072000 | 3.96888800  | 1.75128700  |
| H | -3.67781200 | 2.63784000  | 0.61641600  |
| C | -2.88624400 | 2.03784300  | 2.52290600  |
| H | -2.14899400 | 2.38530900  | 3.25729500  |
| H | -3.86329300 | 1.98037300  | 3.01784500  |
| C | -2.45264400 | -0.24041400 | 3.04490000  |
| H | -3.43550500 | -0.35220600 | 3.51860600  |
| H | -1.73048800 | 0.05387700  | 3.81621500  |
| C | -2.05138500 | -1.55965000 | 2.43335700  |
| H | -2.73157600 | -1.81790800 | 1.61211200  |
| H | -2.12402600 | -2.34294800 | 3.19768100  |

|   |             |             |             |
|---|-------------|-------------|-------------|
| C | -0.26428000 | -2.67636300 | 1.33792200  |
| H | -0.88844500 | -2.90607000 | 0.46522800  |
| H | -0.34237600 | -3.51140200 | 2.04513600  |
| C | 1.18012600  | -2.52614700 | 0.92550100  |
| H | 1.51757100  | -3.47083200 | 0.48353600  |
| H | 1.80572200  | -2.30984600 | 1.79673600  |
| C | 3.71132600  | -1.04115000 | 0.15611100  |
| C | 3.60079300  | -0.10399300 | 1.18365700  |
| H | 2.64365200  | 0.35620800  | 1.39011800  |
| C | 4.70836100  | 0.23821100  | 1.95246500  |
| H | 4.60615500  | 0.96494300  | 2.74975500  |
| C | 5.94528700  | -0.34883900 | 1.70012000  |
| H | 6.80745600  | -0.08192000 | 2.29931400  |
| C | 6.06519400  | -1.28633000 | 0.67943900  |
| H | 7.02121400  | -1.75586200 | 0.48098400  |
| C | 4.95262400  | -1.63270000 | -0.08160100 |
| H | 5.05209800  | -2.37425300 | -0.86739500 |
| K | -0.31905700 | 0.79751700  | 0.26329100  |

**K<sup>+</sup> / 2-Ph-18c6\_c6**

|   |             |             |             |
|---|-------------|-------------|-------------|
| O | 1.68383100  | -0.06127300 | -1.20118000 |
| O | 1.04592800  | 1.29232800  | 1.14111600  |
| O | -1.45179100 | 0.72926500  | 2.40993400  |
| O | -2.17479200 | -2.97868700 | -0.70229800 |
| O | 0.32549500  | -2.39481100 | -1.96904900 |
| O | -2.70308600 | -1.76775700 | 1.82307600  |
| C | 2.62956200  | 0.84689100  | -0.63128400 |
| H | 3.13824600  | 1.38206500  | -1.44509300 |
| C | 1.82439800  | 1.90252800  | 0.12044000  |
| H | 1.16964900  | 2.42521800  | -0.58824100 |
| H | 2.51690500  | 2.63329200  | 0.55388500  |
| C | 0.34829000  | 2.64064100  | 1.94528600  |
| H | -0.33236400 | 2.83468400  | 1.32241000  |
| H | 1.05975100  | 2.92394700  | 2.42428100  |
| C | -0.42554100 | 1.51287800  | 3.01579900  |
| H | -0.86774200 | 2.24938200  | 3.69773600  |
| H | 0.24671800  | 0.86786700  | 3.59422700  |
| C | -2.22667500 | 0.00424400  | 3.36237800  |
| H | -2.69919600 | 0.69693000  | 4.06942500  |
| H | -1.58087400 | -0.67790900 | 3.92868000  |
| C | -3.30430100 | -0.77212400 | 2.64759600  |
| H | -3.95547200 | -1.24340400 | 3.39382500  |
| H | -3.91570000 | -0.09712800 | 2.03588500  |
| C | -3.66030300 | -2.56581700 | 1.13054100  |
| H | -4.32361400 | -3.06572200 | 1.84684700  |
| H | -4.27441000 | -1.93327800 | 0.47754100  |
| C | -2.94300200 | -3.61400800 | 0.31706400  |
| H | -4.21149500 | -4.21149500 | 0.96284100  |
| H | -3.68631800 | -4.28357100 | -0.13277300 |
| C | -1.47775400 | -3.90754900 | -1.53019500 |
| H | -2.18972000 | -4.58236500 | -2.02068400 |
| H | -0.79343800 | -4.51175700 | -0.92221900 |
| C | -0.70803900 | -3.15688100 | -2.58789200 |
| H | -1.38147800 | -2.49497200 | -3.14672500 |
| H | -0.27467700 | -3.87775200 | -3.29176800 |
| C | 1.08544800  | -1.63242400 | -2.90361900 |
| H | 1.50476200  | -2.28828600 | -3.67655100 |
| H | 0.43928400  | -0.89367900 | -3.39454100 |
| C | 2.22185600  | -0.94460800 | -2.18655700 |
| H | 2.87890700  | -1.68265100 | -1.71704900 |
| H | 2.80689900  | -0.37784800 | -2.92050100 |
| C | 3.69281700  | 0.17681600  | 0.22563900  |
| C | 3.42481300  | -0.95306500 | 0.99816500  |
| H | 2.44266300  | -1.40571600 | 0.96819800  |
| C | 4.41503800  | -1.51505300 | 1.79787700  |
| H | 4.19287400  | -2.39558600 | 2.38909000  |
| C | 5.68683600  | -0.95104400 | 1.84024200  |
| H | 6.45709100  | -1.38950700 | 2.46317800  |
| C | 5.96500900  | 0.17358300  | 1.06986100  |
| H | 6.95446100  | 0.61458100  | 1.08737700  |
| C | 4.97475600  | 0.72742400  | 0.26449300  |
| H | 5.20420400  | 1.59675200  | -0.34323500 |
| K | -0.68317400 | -0.73811000 | 0.13374800  |
